# Supplementary material for: Mechanistic characterisation of the diterpene synthase for clitopilene and identification of isopentalenene synthase from the fungus Clitopilus passeckerianus
Source: Royal Society of Chemistry journal article supplement (doi:10.1039/d4cc02286f), 2024-01-01
Supplement: d4cc02286f1.pdf [file d4cc02286f1.pdf]

## Table of Contents

|                                                             |    |
|-------------------------------------------------------------|----|
| Sources of chemicals and enzymes, reverse transcriptase PCR | 2  |
| Gene expression and purification of CpTS1 and CpTS2         | 3  |
| Amino acid sequence of CpTS1                                | 4  |
| Incubation experiments with CpTS1 and CpTS2                 | 5  |
| Analytical methods                                          | 6  |
| Substrate screening for CpTS1                               | 7  |
| Structure elucidation and NMR data of <b>1</b>              | 8  |
| Computational methods                                       | 16 |
| Computational data                                          | 17 |
| Isotopic labelling experiments                              | 19 |
| The absolute configuration of <b>1</b>                      | 23 |
| Amino acid sequence of CpTS2                                | 25 |
| Substrate screening for CpTS2                               | 26 |
| Structure elucidation and NMR data of <b>2</b>              | 28 |
| The absolute configuration of <b>2</b>                      | 36 |
| Cartesian coordinates of computed structures                | 37 |
| References                                                  | 66 |



### Gene expression and purification of CpTS1 and CpTS2

Small scale cultures of *Escherichia coli* BL21 (DE3) transformed with pYE-CpTS1 or pYE-CpTS2 were grown in LB (Lennox) medium (10 mL) containing kanamycin sulfate (50 µg/mL) overnight with shaking at 37 °C. The gene expression cultures in LB (Lennox) medium containing kanamycin sulfate (50 µg/mL) were inoculated with the grown overnight culture (2 %). Culturing was continued with shaking at 37 °C until an OD<sub>600</sub> = 0.4 – 0.6 was reached. After cooling the culture to 18 °C, enzyme expression was induced by the addition of IPTG solution (100 mM, 1 ‰, v/v). The cultures were shaken at 18 °C for 18 h. Cells were harvested via centrifugation (1,500 g, 40 min, 4 °C), resuspended in binding buffer (30 mL/L culture; 20 mM Na<sub>2</sub>HPO<sub>4</sub>, 500 mM NaCl, 20 mM imidazole, 1 mM MgCl<sub>2</sub>, adjusted with 1 N HCl to pH = 7.4, stored after preparation at 4 °C) and lysed by ultrasonication (10x 1 min) on ice. The cell debris was removed by centrifugation (14,600 g, 7 min, 4 °C) and the supernatant was loaded on a Ni<sup>2+</sup>-NTA superflow affinity chromatography column (Qiagen, Venlo, Netherlands) equilibrated with binding buffer. The column was washed with binding buffer (2 column volumes, CV) and washing buffer (2 CV; 20 mM Na<sub>2</sub>HPO<sub>4</sub>, 500 mM NaCl, 100 mM imidazole, 1 mM MgCl<sub>2</sub>, adjusted with 1 N HCl to pH = 7.4, stored after preparation at 4 °C). The desired protein was eluted with elution buffer (1 CV; 20 mM Na<sub>2</sub>HPO<sub>4</sub>, 500 mM NaCl, 500 mM imidazole, 1 mM MgCl<sub>2</sub>, adjusted with 1 N HCl to pH = 7.4, stored after preparation at 4 °C). Protein purity was checked by SDS-PAGE analysis (Figure S1) and protein concentrations were determined through Bradford assay.<sup>3</sup> Typical protein yields were 2.0 mg/mL (CpTS1) and 2.3 mg/mL (CpTS2).

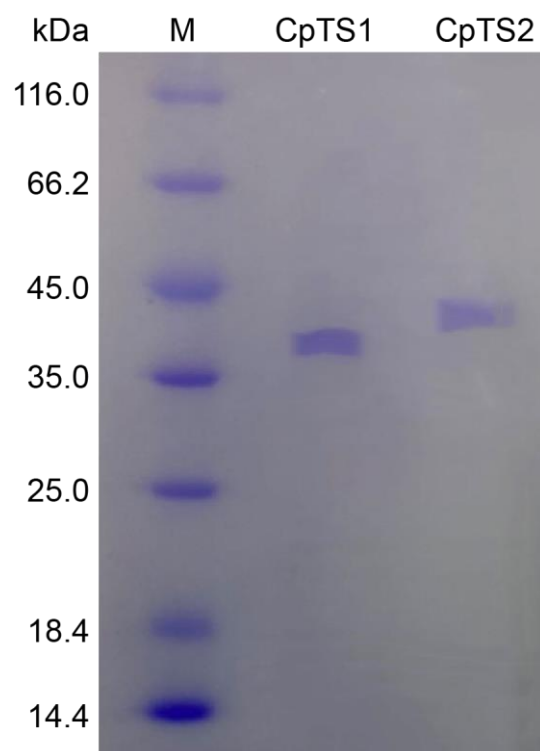

**Figure S1.** SDS-PAGE analysis of purified recombinant CpTS1 and CpTS2. M = protein marker.

MVSVLSTALCKRPNFVSRFPANEHFDRGVIAENVQWYLSEKWPWKSDAERERYLTKDFEGWGLMI  
LGDAPSDRTEAACLFWSWFLW**DDMVE**KMSSSEARLSLVQLAEIFSDTRIPKDPTPIERIALAIR  
DMLLEVDDDDLRDLGRSILTQVCHFFTAIGSKQDRARAFAGGFDSFIKY**RL**NDVGGRLALELLLW  
ARGCIIPPNAKSTGLADLVNISLLHATLI**NDFFSYEVE**AEVLRELEFSGRKKHGYMVFNTVAVLM  
AEKSMSRTDAYVELIEKIKVVEKRYVKALDDLRIHRHRESGEDLRIIEVSDVLVDLMGGNSVWSE  
TCG**RY**NPA

**Figure S2.** Amino acid sequence of CpTS1 from *Clitopilus passeckerianus* (accession number PP777465). Highly conserved motifs are highlighted in bold.

### Test incubations for determination of the substrate scope of CpTS1 and CpTS2

For test enzymatic conversions the substrates GPP, FPP, GGPP and GFPP (trisammonium salts, 1 mg each) were dissolved in incubation buffer (0.8 mL; 50 mM Tris/HCl, 10 mM MgCl<sub>2</sub>, 10% glycerol (v/v), 20 mM  $\beta$ -cyclodextrin, adjusted with 1 N HCl to pH = 8.2), followed by vortexing of the solutions to remove micelles. Enzyme preparations were obtained as mentioned above and added to the substrate solutions (0.2 mL, enzyme concentration: 2.0 mg/mL (CpTS1) and 2.3 mg/mL (CpTS2)), followed by incubation for 16 h at 30 °C. The reaction mixtures were extracted with n-hexane, the extracts were dried with MgSO<sub>4</sub> and analysed by GC/MS.

### Preparative scale incubations with CpTS1 and CpTS2 and compound isolations

A preparative scale enzymatic conversion of trisammonium GGPP (60 mg, 120  $\mu$ mol) was done in incubation buffer (100 mL). An enzyme preparation of CpTS1 (20 mL, 2.0 mg mL<sup>-1</sup>) was added (final substrate concentration of 1 mmol L<sup>-1</sup>, final enzyme concentration of 0.3 mg L<sup>-1</sup>), followed by incubation for 16 h at 30 °C. The reaction mixture were extracted with n-hexane (3x 100 mL), the combined extracts were dried with MgSO<sub>4</sub> and the solvent was evaporated. The crude product was purified via column chromatography on silica gel with pentane yield pure **1** (1.2 mg, 4.4  $\mu$ mol, 3.7%).

Analogously, a preparative scale enzymatic conversion of trisammonium FPP (100 mg, 231  $\mu$ mol) was done in incubation buffer (80 mL). An enzyme preparation of CpTS2 (30 mL, 2.3 mg mL<sup>-1</sup>) was added (final substrate concentration of 2.1 mmol L<sup>-1</sup>, final enzyme concentration of 0.6 mg L<sup>-1</sup>), followed by incubation for 16 h at 30 °C. The reaction mixture were extracted with n-hexane (3x 100 mL), the combined extracts were dried with MgSO<sub>4</sub> and the solvent was evaporated. The crude product was purified via column chromatography on silica gel with n-pentane, followed by column chromatography on activated silica gel with pentane to yield pure **2** (1.5 mg, 7.3  $\mu$ mol, 3.2%).

For the preparation of activated silica gel, 10 g of silica gel were dissolved in sat. AgNO<sub>3</sub> solution in methanol overnight, followed by rigorous evaporation of the solvent.

**Clitopilene (1).** TLC (pentane):  $R_f$  = 0.91. GC (HP5-MS):  $I$  = 1845. IR (diamond ATR):  $\tilde{\nu}$  / cm<sup>-1</sup> = 2945 (s), 2923 (s), 2856 (m), 1654 (w), 1636 (w), 1458 (m), 1373 (w), 1271 (w), 1260 (w), 1093 (w), 1082 (w), 1028 (w), 810 (w). HR-MS (APCI): calc. for [C<sub>20</sub>H<sub>32</sub>]<sup>+</sup>  $m/z$  = 272.2499; found:  $m/z$  = 272.2498.. Optical rotation:  $[\alpha]_D^{25}$  = -26.7 (c 0.12, acetone). NMR data are given in Table S2.

**Isopentalenene (2).** TLC (pentane):  $R_f$  = 0.90. activated TLC (pentane):  $R_f$  = 0.90. GC (HP5-MS):  $I$  = 1362. IR (diamond ATR):  $\tilde{\nu}$  / cm<sup>-1</sup> = 2953 (s), 2923 (s), 2687 (s), 2003 (w), 1735 (w), 1461 (w), 1440 (w), 1379 (w), 1365 (w), 1093 (w), 1021 (w). HR-MS (APCI): calc. for [C<sub>15</sub>H<sub>24</sub>]<sup>+</sup>  $m/z$  = 204.1878; found:  $m/z$  = 204.1885. Optical rotation:  $[\alpha]_D^{25}$  = 9.3 (c 0.15, acetone). NMR data are given in Table S5.

### **GC/MS**

GC/MS analyses were carried out on a 7890B/5977A series gas chromatography/mass selective detector (Agilent, Santa Clara, CA, USA). The GC was equipped with an HP5-MS fused silica capillary column (30 m, 0.25 mm i. d., 0.50  $\mu\text{m}$  film; Agilent) and operated using the settings 1) inlet pressure: 77.1 kPa, He at 23.3 mL min<sup>-1</sup>, 2) injection volume: 1 – 2  $\mu\text{L}$ , 3) temperature program: 5 min at 50 °C then increasing 5 °C min<sup>-1</sup> to 320 °C, 4) 60 s valve time, and 5) carrier gas: He at 1.2 mL min<sup>-1</sup>. The MS was operated with settings 1) source: 230 °C, 2) transfer line: 250 °C, 3) quadrupole: 150 °C and 4) electron energy: 70 eV.

### **HRMS**

High resolution mass spectra using APCI were recorded on an Orbitrap XL instrument (Thermo Fisher Scientific, Waltham, MA, USA).

### **NMR spectroscopy**

NMR spectra were recorded at 298 K on a Bruker (Billerica, MA, USA) Avance III HD Cryo (700 MHz) NMR spectrometer. Spectra were measured in C<sub>6</sub>D<sub>6</sub> and referenced against solvent signals (<sup>1</sup>H-NMR, residual proton signal:  $\delta$  = 7.16 ppm; <sup>13</sup>C-NMR:  $\delta$  = 128.06 ppm).<sup>4</sup> Coupling constants are given in Hz.

### **IR spectroscopy**

IR spectra were recorded on a Bruker  $\alpha$  infrared spectrometer with a diamond ATR probehead. Peak intensities are given as s (strong), m (medium), w (weak) and br (broad).

### **Optical rotations**

Optical rotations were recorded on a Modular Compact Polarimeter MCP 100 (Anton Paar, Graz, Austria). The temperature setting was 25 °C; the wavelength of the light used was 589 nm (sodium D line); the path-length was 10 cm, the compound concentrations *c* are given in g 100 mL<sup>-1</sup>.

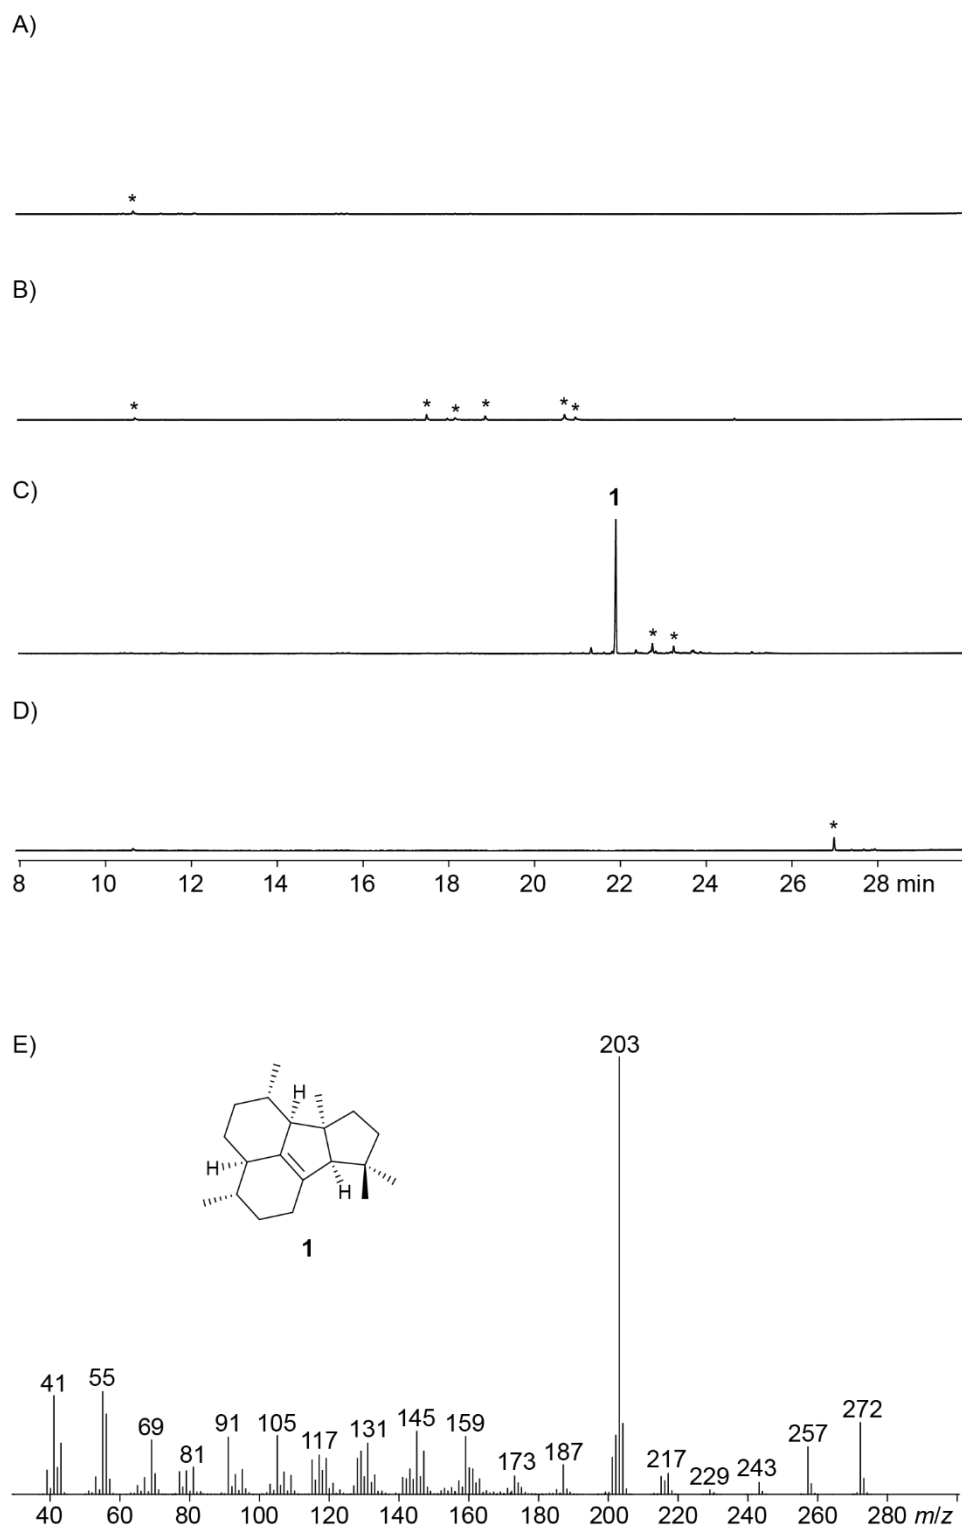

**Figure S3.** Substrate screening for CpTS1. Chromatograms of extracts obtained from an incubation of A) GPP, B) FPP, C) GGPP, and D) GFPP with CpTS1. E) EI mass spectrum of clitopilene (**1**). Asterisks indicate spontaneous hydrolysis products and contaminants such as plasticisers.

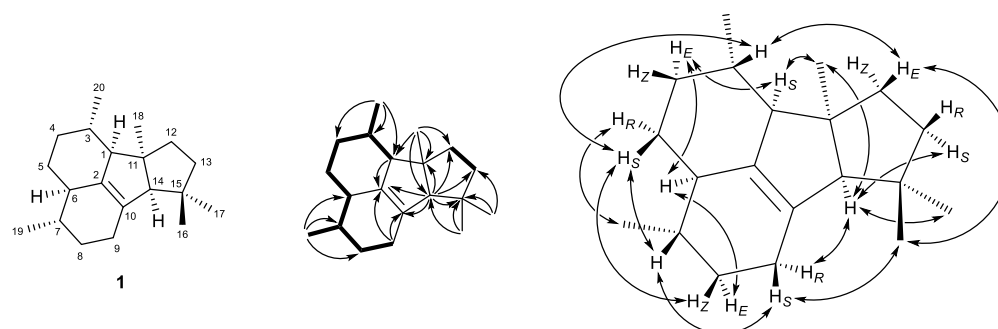

**Figure S4.** Structure elucidation of **1**. Bold bonds indicate  $^1\text{H}$ ,  $^1\text{H}$ -COSY correlations, single headed arrows indicate key HMBC correlations, and double headed arrows indicate key NOESY correlations.

**Table S2.** NMR data of clitopilene (**1**) in  $\text{C}_6\text{D}_6$  recorded at 298 K.

| C <sup>[a]</sup> | type            | $^{13}\text{C}$ <sup>[b]</sup> | $^1\text{H}$ <sup>[b]</sup>                                                                                            |
|------------------|-----------------|--------------------------------|------------------------------------------------------------------------------------------------------------------------|
| 1                | CH              | 62.90                          | 1.57 (m)                                                                                                               |
| 2                | C <sub>q</sub>  | 139.30                         | –                                                                                                                      |
| 3                | CH              | 35.47                          | 1.25 (m)                                                                                                               |
| 4                | CH <sub>2</sub> | 35.71                          | 1.67 (dddd, $J = 13.1, 3.3, 3.3, 3.3$ , H <sub>Z</sub> )<br>1.03 (m, H <sub>E</sub> )                                  |
| 5                | CH <sub>2</sub> | 32.40                          | 1.97 (dddd, $J = 12.7, 5.1, 3.3, 3.3$ , H <sub>R</sub> )<br>0.71 (dddd, $J = 13.1, 13.1, 12.0, 3.1$ , H <sub>S</sub> ) |
| 6                | CH              | 43.40                          | 1.54 (m)                                                                                                               |
| 7                | CH              | 36.72                          | 1.15 (m)                                                                                                               |
| 8                | CH <sub>2</sub> | 32.50                          | 1.57 (m, H <sub>Z</sub> )<br>1.25 (m, H <sub>E</sub> )                                                                 |
| 9                | CH <sub>2</sub> | 27.14                          | 2.02 (m, H <sub>S</sub> )<br>1.85 (m, H <sub>R</sub> )                                                                 |
| 10               | C <sub>q</sub>  | 131.43                         | –                                                                                                                      |
| 11               | C <sub>q</sub>  | 51.55                          | –                                                                                                                      |
| 12               | CH <sub>2</sub> | 34.02                          | 1.82 (ddd, $J = 12.6, 12.6, 6.1$ , H <sub>E</sub> )<br>1.30 (ddd, $J = 12.6, 6.4, 1.5$ , H <sub>Z</sub> )              |
| 13               | CH <sub>2</sub> | 43.12                          | 1.61 (m, H <sub>S</sub> )<br>1.40 (ddd, $J = 11.7, 6.1, 1.3$ , H <sub>R</sub> )                                        |
| 14               | CH              | 73.72                          | 2.14 (br d, $J = 2.6$ )                                                                                                |
| 15               | C <sub>q</sub>  | 41.82                          | –                                                                                                                      |
| 16               | CH <sub>3</sub> | 30.71                          | 1.17 (br s)                                                                                                            |
| 17               | CH <sub>3</sub> | 23.21                          | 0.82 (s)                                                                                                               |
| 18               | CH <sub>3</sub> | 34.26                          | 1.21 (br s)                                                                                                            |
| 19               | CH <sub>3</sub> | 19.98                          | 0.98 (d, $J = 6.6$ )                                                                                                   |
| 20               | CH <sub>3</sub> | 21.36                          | 0.92 (d, $J = 6.2$ )                                                                                                   |

[a] Carbon numbering as shown in Figure S4. [b] Chemical shifts  $\delta$  in ppm, multiplicity: s = singlet, d = doublet, m = multiplet, br = broad, coupling constants  $J$  are given in Hertz.



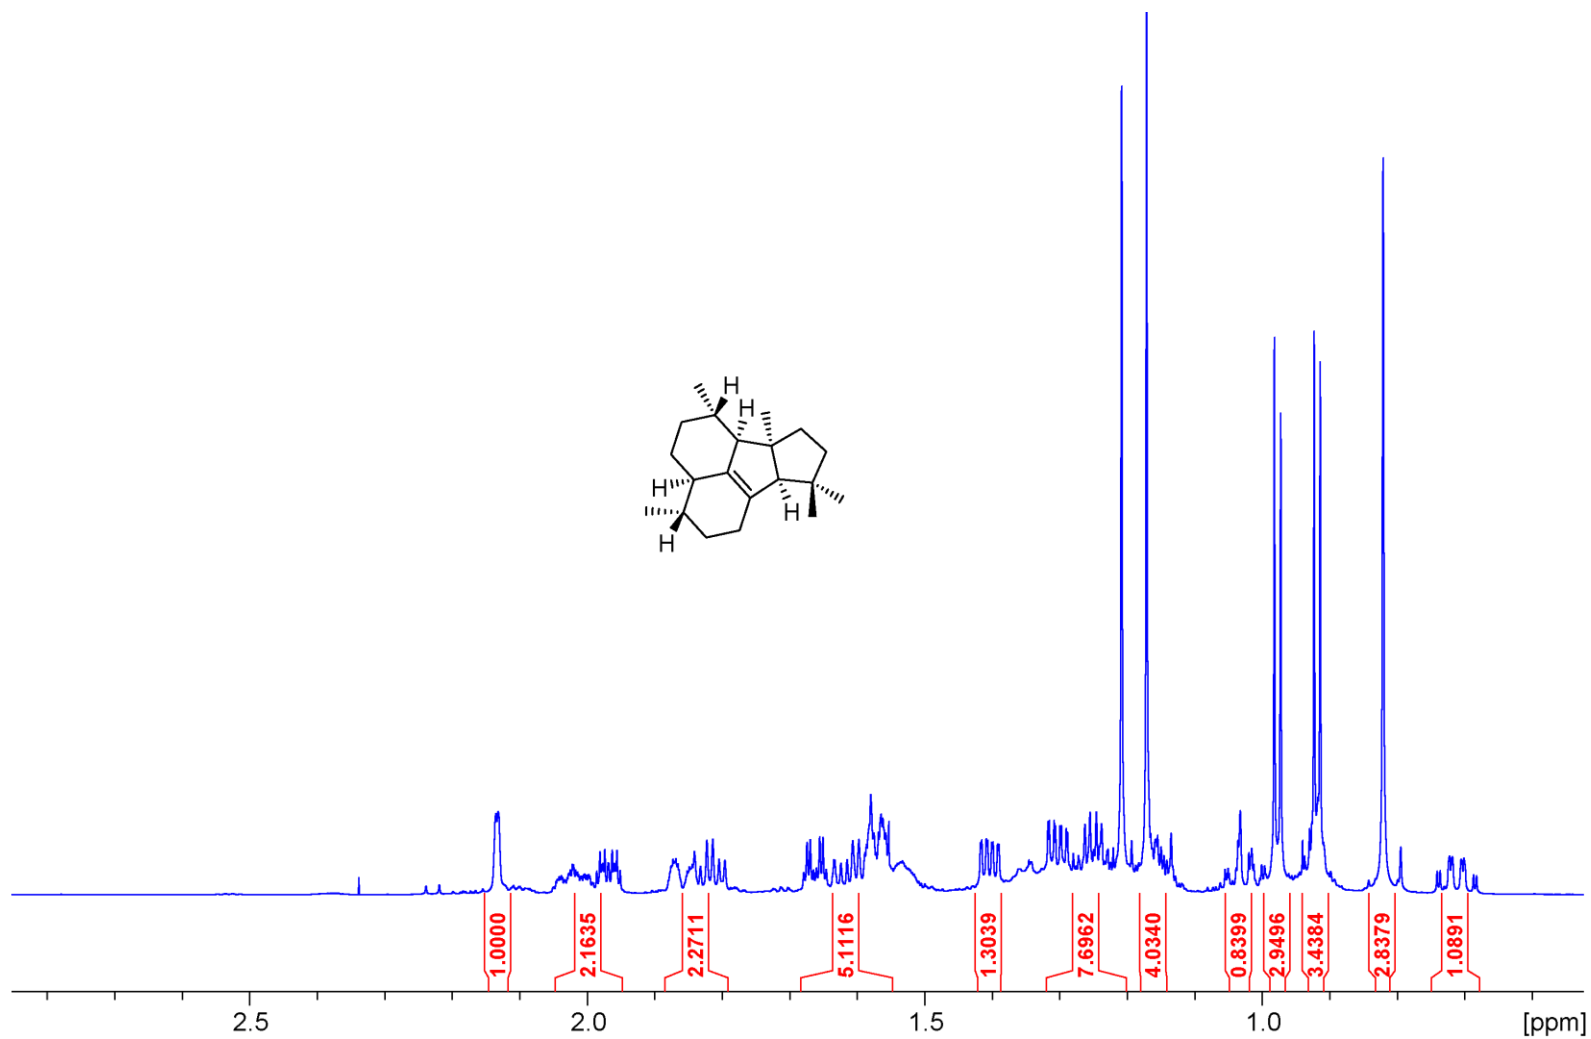

**Figure S5.** <sup>1</sup>H-NMR spectrum of **1** (700 MHz, C<sub>6</sub>D<sub>6</sub>).

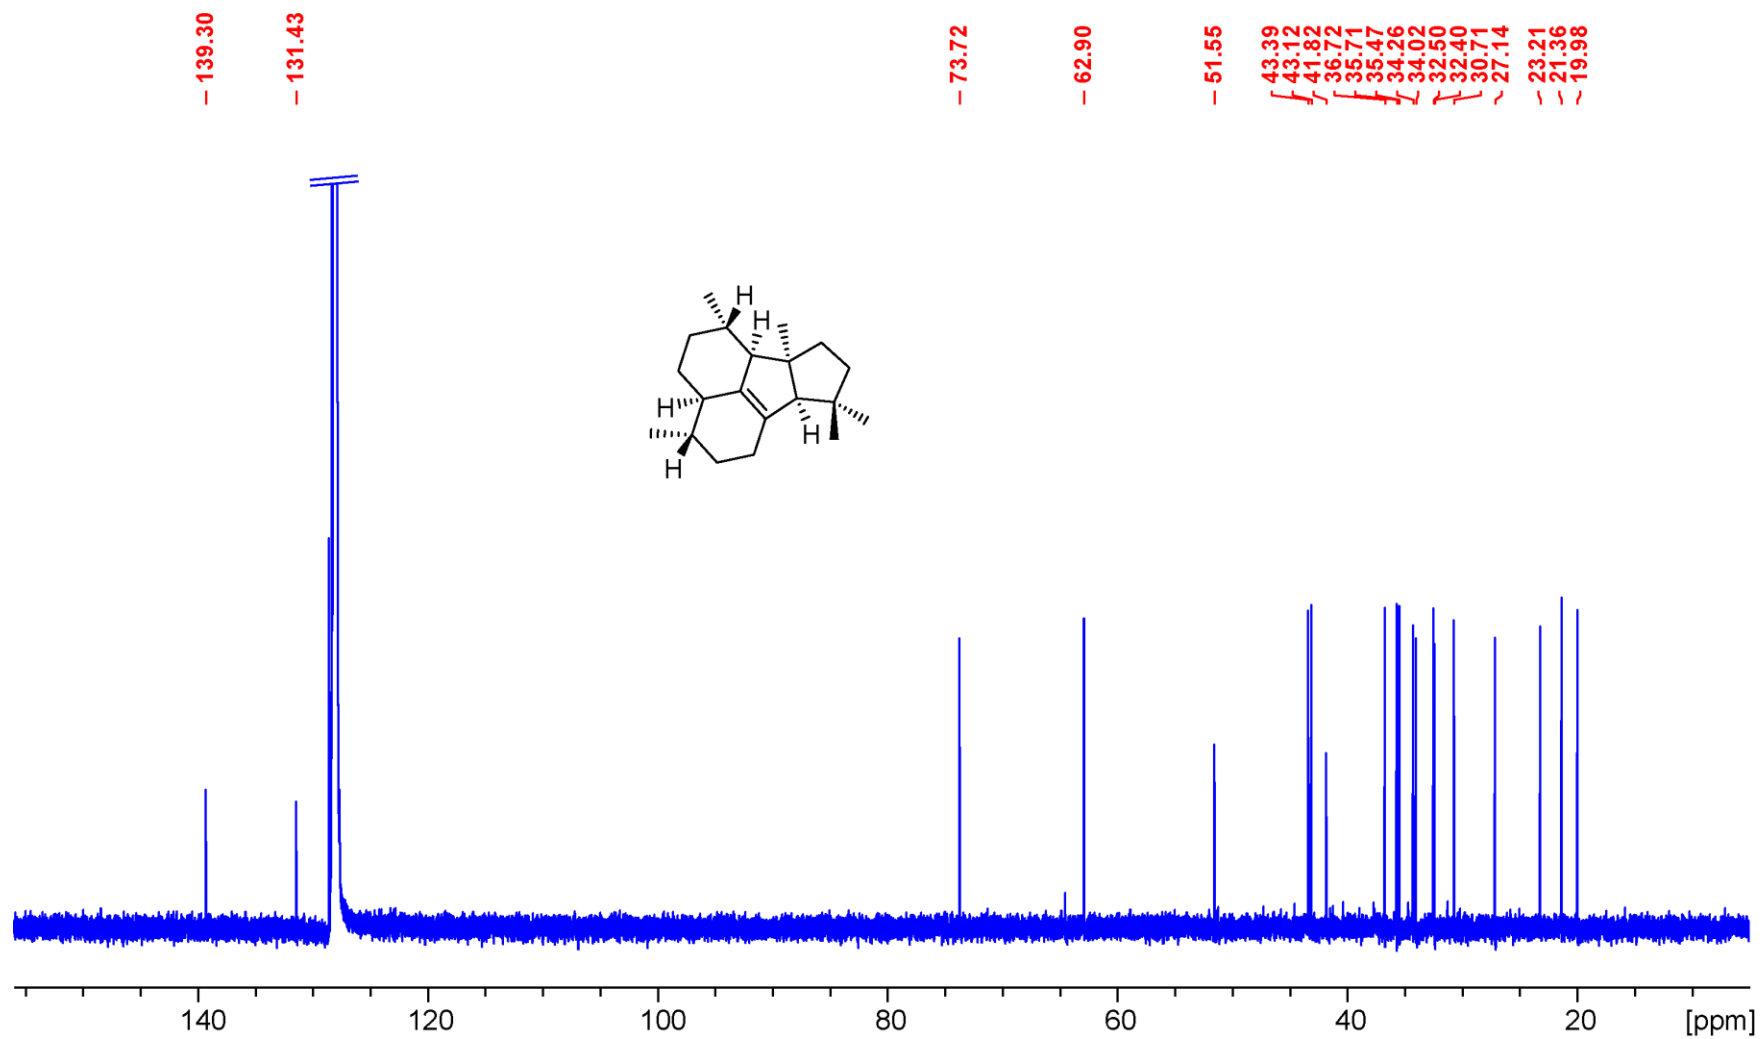

Figure S6. <sup>13</sup>C-NMR spectrum of **1** (176 MHz, C<sub>6</sub>D<sub>6</sub>).

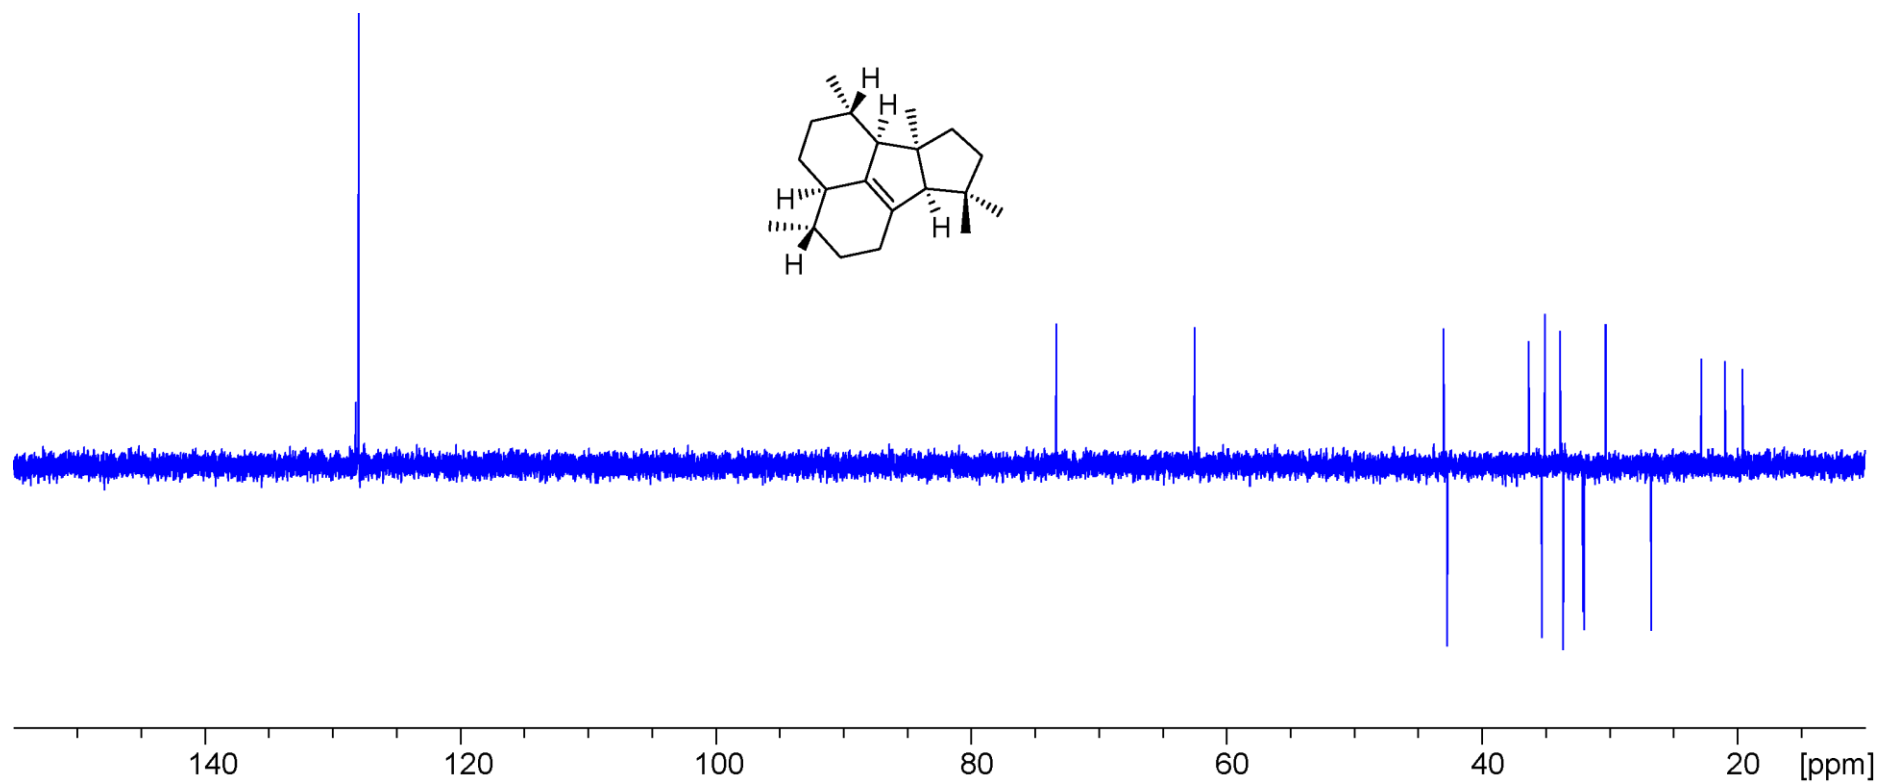

**Figure S7.**  $^{13}\text{C}$ -DEPT spectrum of **1** (176 MHz,  $\text{C}_6\text{D}_6$ ).

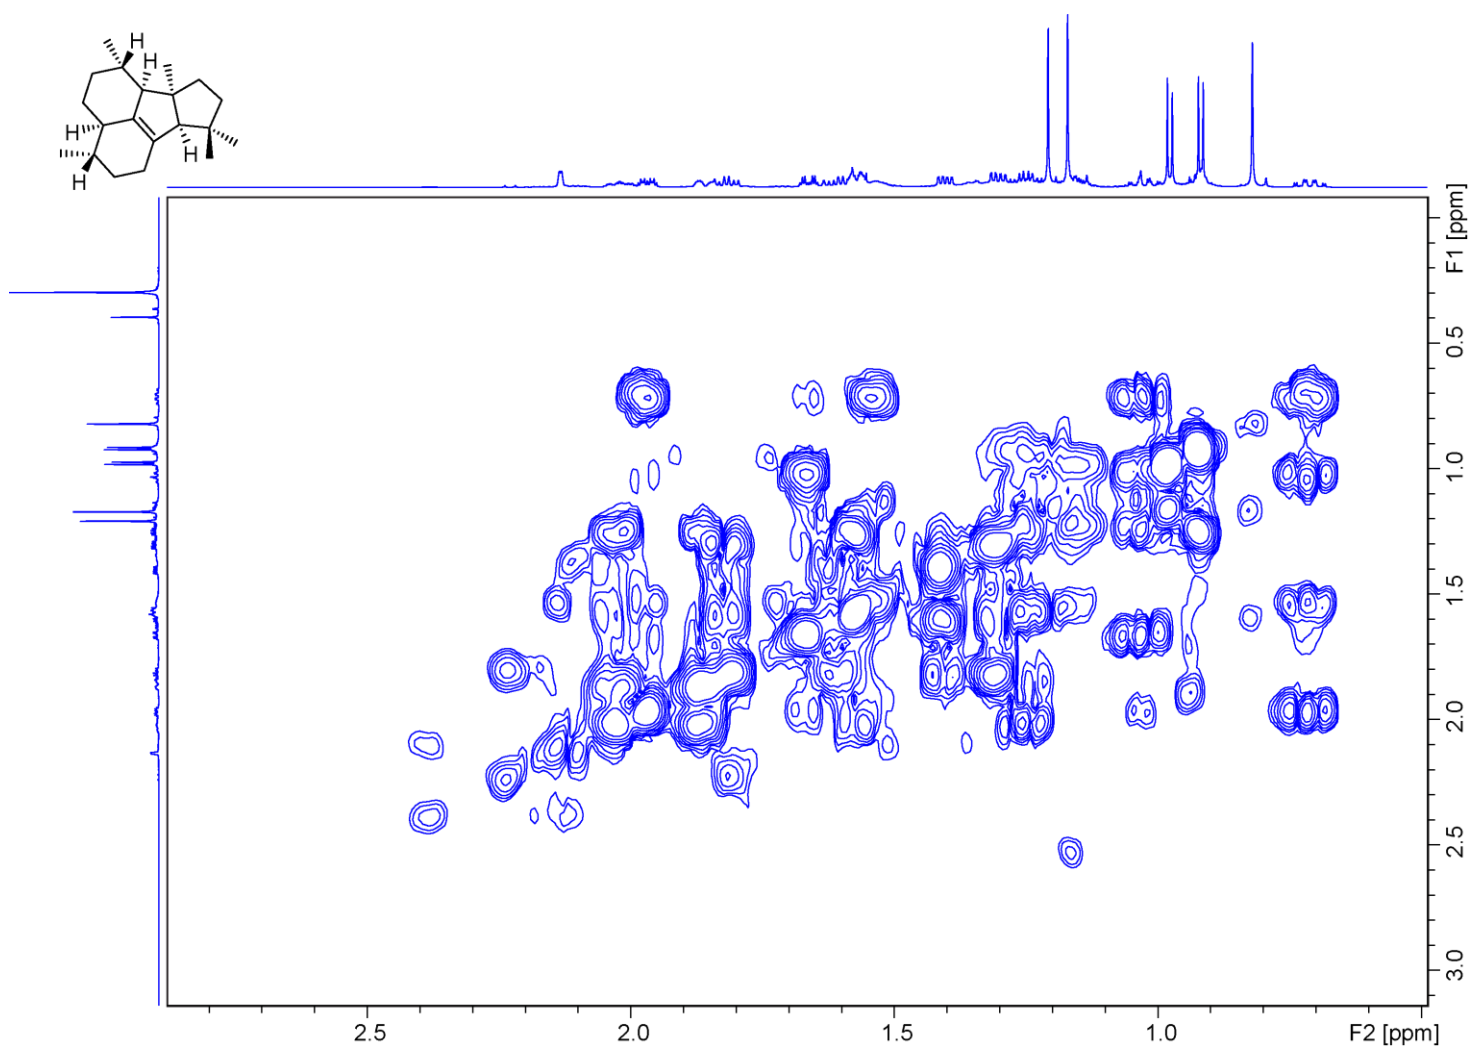

**Figure S8.**  $^1\text{H}, ^1\text{H}$ -COSY spectrum of **1** (700 MHz,  $\text{C}_6\text{D}_6$ ).

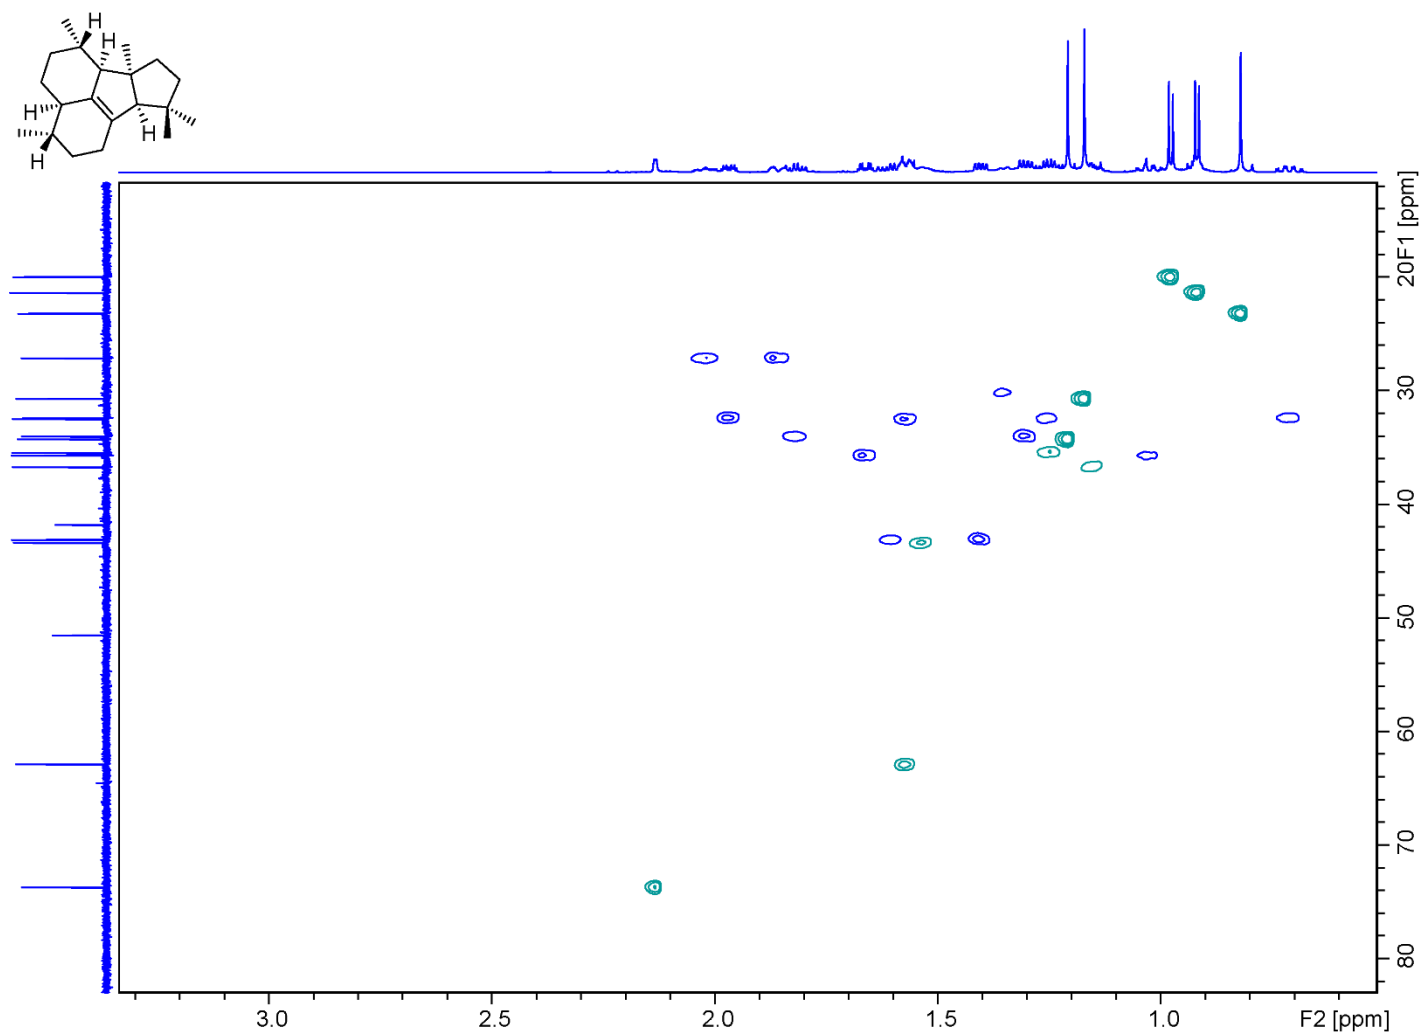

**Figure S9.** HSQC spectrum of **1** ( $C_6D_6$ ).

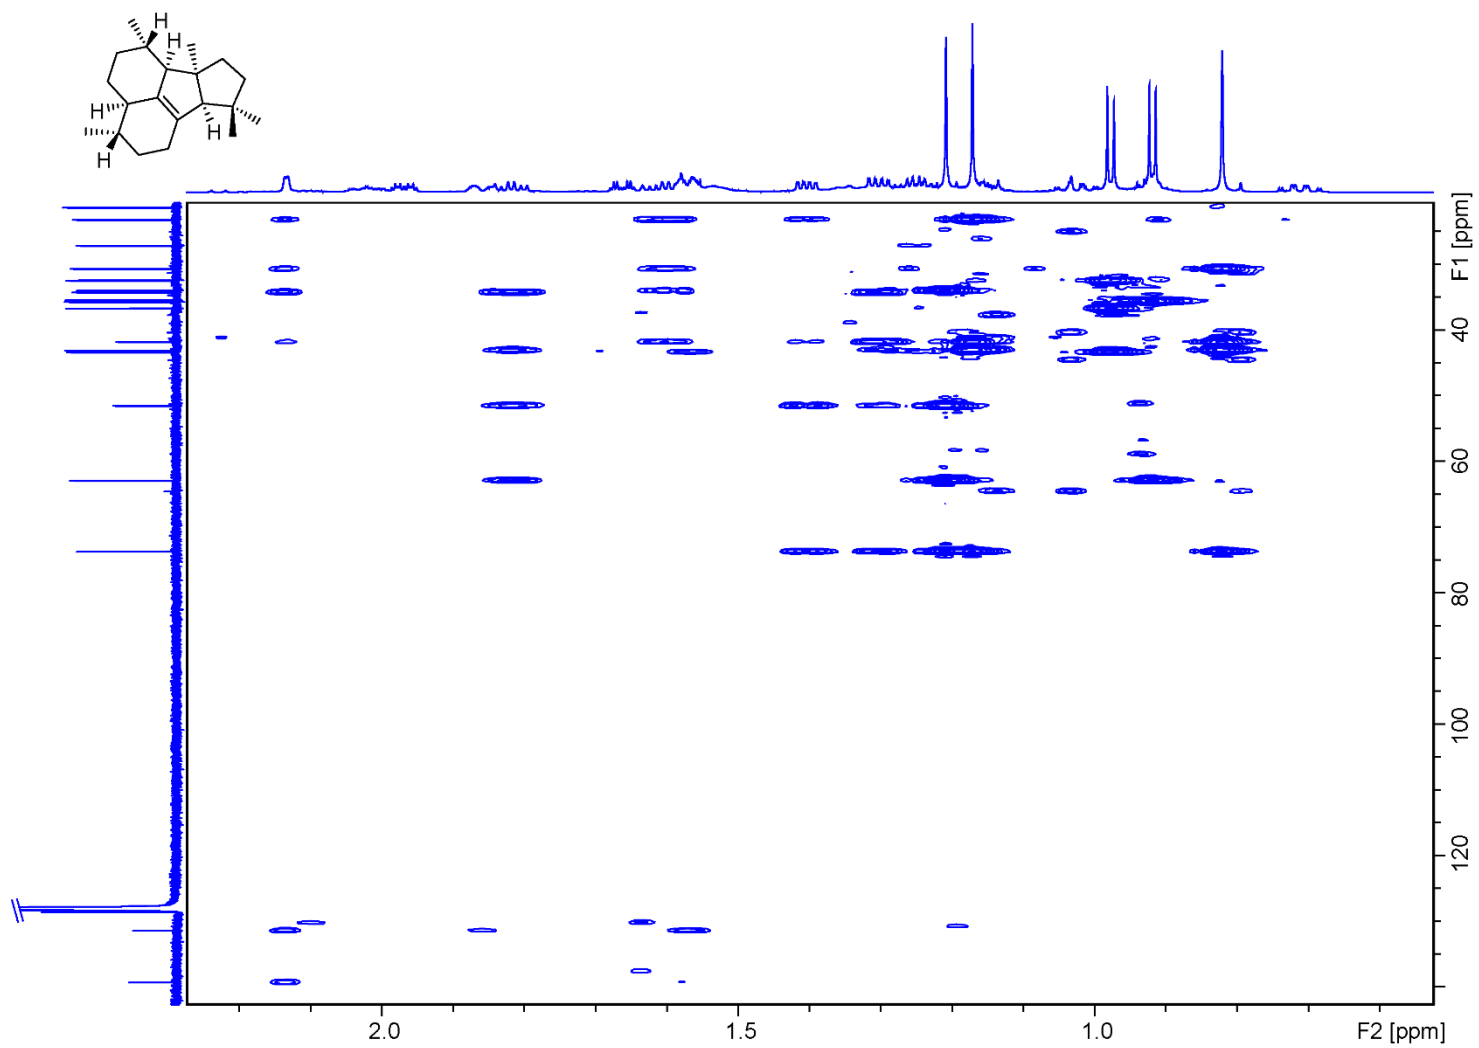

**Figure S10.** HMBC spectrum of **1** ( $C_6D_6$ ).

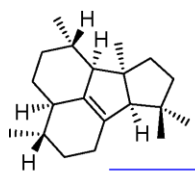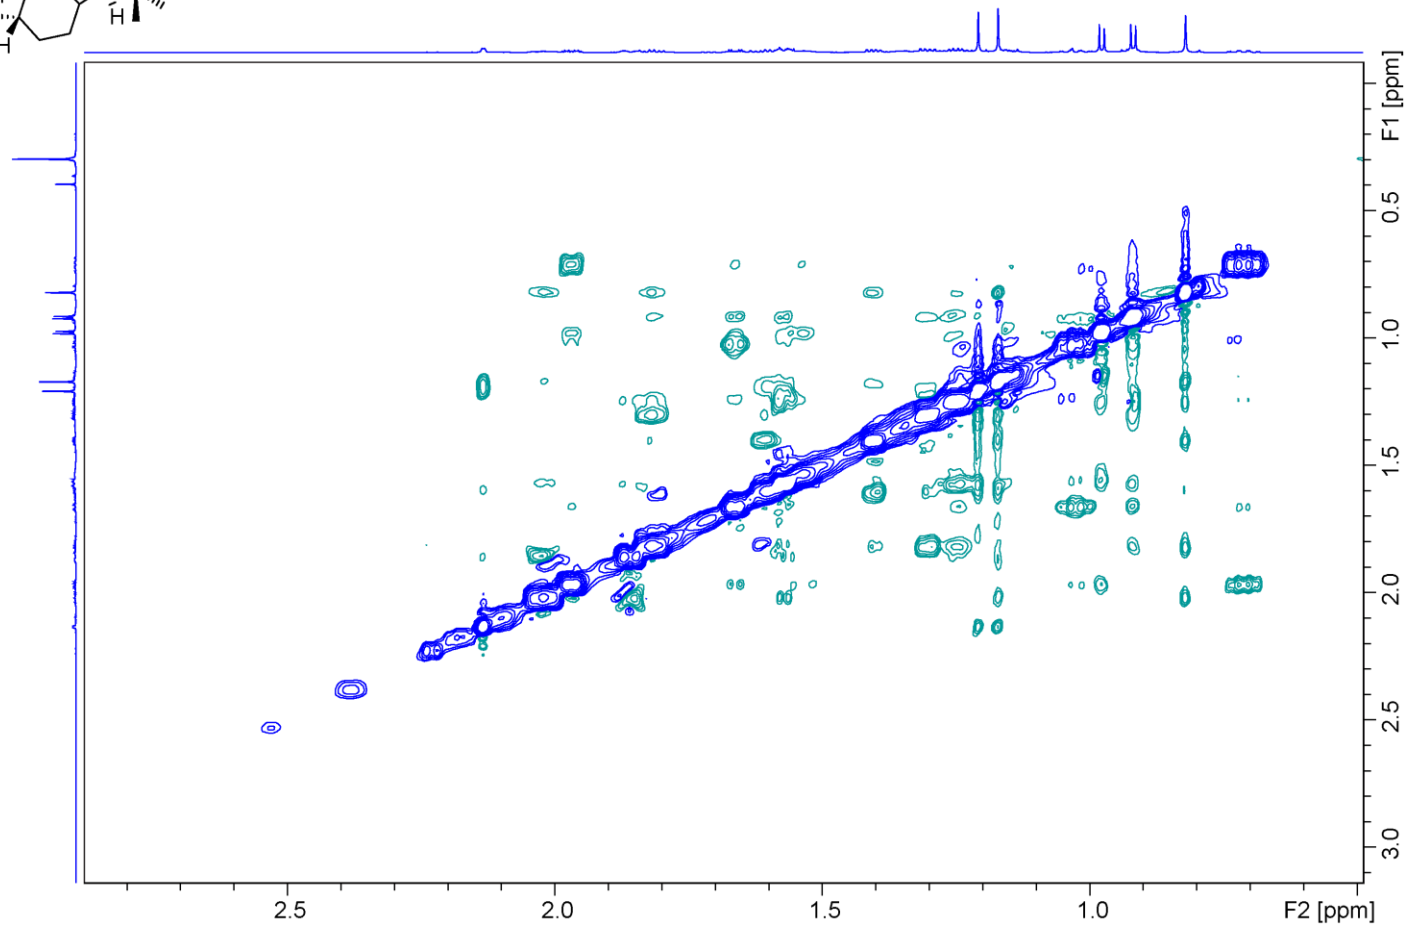

Figure S11. NOESY spectrum of **1** ( $C_6D_6$ ).

### **Computational methods**

All computed structures were geometry optimized without restrictions and were characterized as minima or as transition state structures by frequency analyses using the B97D3/6-31g(d,p) method with the density fitting approximation for s- and p-functions, including Grimme's empirical D3-dispersion correction<sup>5</sup> in Gaussian16.<sup>6</sup> Frequency computations also provided Gibbs corrections, which include Grimme's quasi-RRHO approach with a frequency cut-off value of 100.0 wave numbers using GoodVibes.<sup>7,8</sup> For single point energies, the mPW1PW91 functional was applied with the 6-311+G(d,p) basis set without density fitting and the ultra-fine integration grid, as this method was shown to be very reliable for examining carbocation cyclization and rearrangement reactions.<sup>9-13</sup> Conformational analyses were performed with xTB-GFN2 in the CREST 2.12 program ([github.com/crest-lab](https://github.com/crest-lab)), developed by the Grimme group.<sup>14-18</sup> Additionally, Orca 5.0.4<sup>19</sup> was used to localize transition state structures.



**Table S3.** Results of DFT calculations for the cyclisation cascade from GGPP to **1**.

| Structure | Gibbs energy (298.15K)<br>in Hartree | energy relative to A<br>in kcal/mol | reaction barrier<br>in kcal/mol | Gibbs free energy<br>in kcal/mol |
|-----------|--------------------------------------|-------------------------------------|---------------------------------|----------------------------------|
| A         | -781.709854                          | 0.0                                 |                                 |                                  |
| A-TS      | -781.690804                          | 12.0                                | 12.0                            |                                  |
| B         | -781.704738                          | 3.2                                 |                                 | 3.2                              |
| B         | -781.707534                          | 1.5                                 |                                 |                                  |
| B-TS      | -781.700262                          | 6.0                                 | 4.6                             |                                  |
| C         | -781.698414                          | 7.2                                 |                                 | 5.7                              |
| C         | -781.700102                          | 6.1                                 |                                 |                                  |
| C-TS      | -781.701853                          | 5.0                                 | -1.1                            |                                  |
| D         | -781.709977                          | -0.1                                |                                 | -6.2                             |
| D         | -781.709977                          | -0.1                                |                                 |                                  |
| D-TS      | -781.707568                          | 1.4                                 | 1.5                             |                                  |
| E         | -781.741035                          | -19.6                               |                                 | -19.5                            |
| E         | -781.741033                          | -19.6                               |                                 |                                  |
| E-TS      | -781.727775                          | -11.3                               | 8.3                             |                                  |
| F         | -781.749734                          | -25.0                               |                                 | -5.5                             |
| F         | -781.749731                          | -25.0                               |                                 |                                  |
| F-TS      | -781.753429                          | -27.3                               | -2.3                            |                                  |
| G         | -781.768851                          | -37.0                               |                                 | -12.0                            |
| G         | -781.770143                          | -37.8                               |                                 |                                  |
| G-TS      | -781.768362                          | -36.7                               | 0.3                             |                                  |
| H         | -781.778527                          | -43.1                               |                                 | -5.3                             |
| H         | -781.778527                          | -43.1                               |                                 |                                  |
| H-TS      | -781.767828                          | -36.4                               | 6.7                             |                                  |
| I         | -781.775876                          | -41.4                               |                                 | 1.7                              |
| I         | -781.762206                          | -32.9                               |                                 |                                  |
| I-TS      | -781.754193                          | -27.8                               | 5.0                             |                                  |
| J         | -781.791289                          | -51.1                               |                                 | -18.3                            |

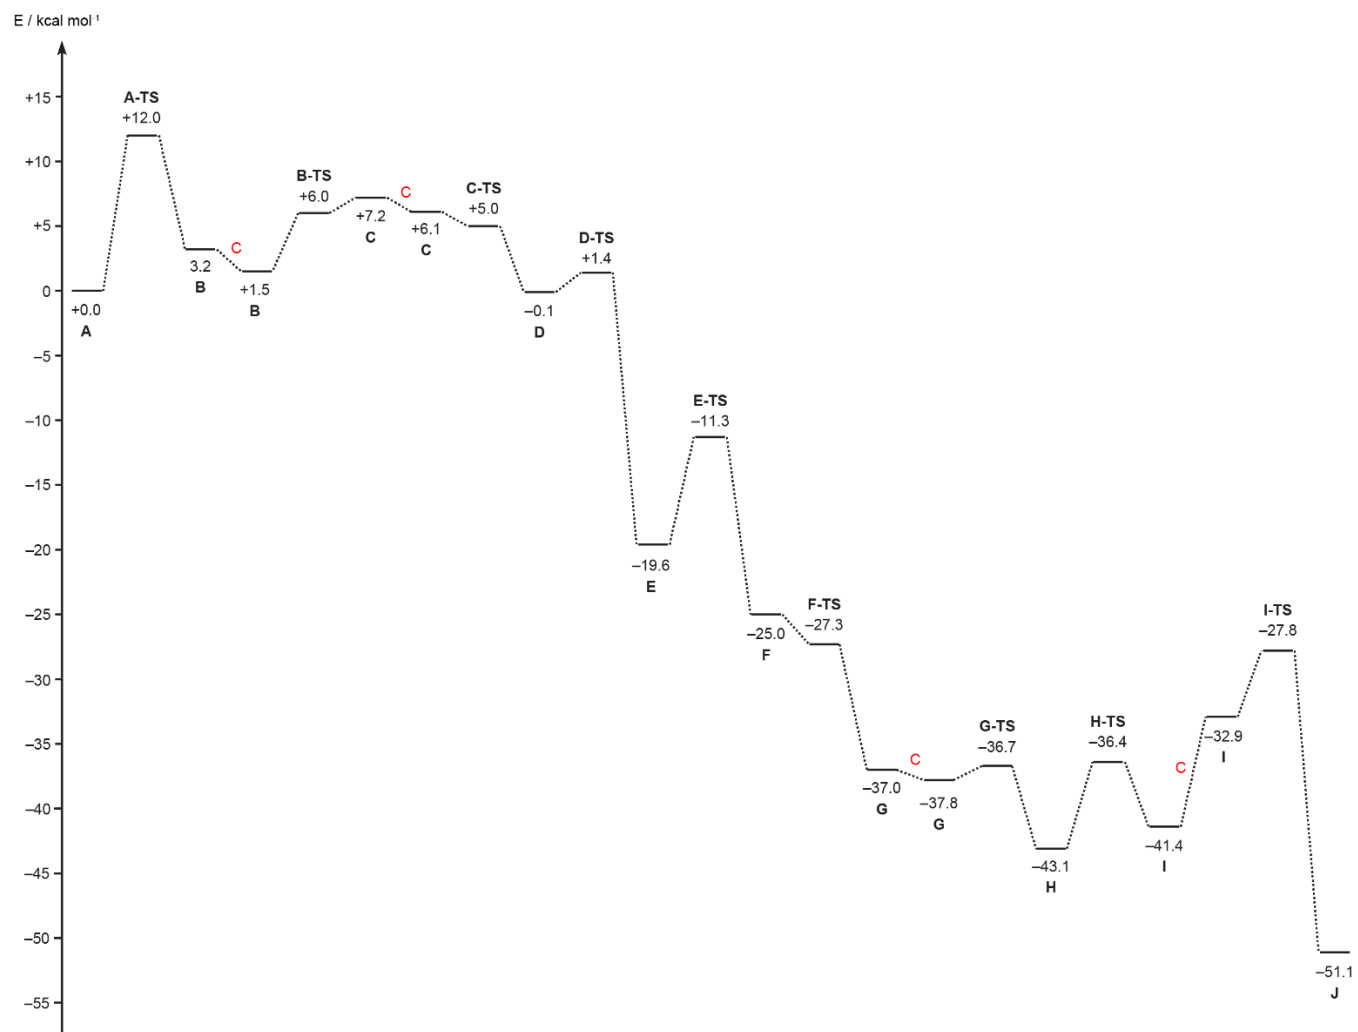

**Figure S12.** Computed energy profile for the cyclisation of GGPP to **1**. Red letters C indicate required conformational changes of intermediates.

### Isotopic labelling experiments

Isotopic labelling experiments were performed with the substrates and enzymes as listed in Table S4. Isotopic labelling experiments were carried out with ca. 1 mg labelled GGPP or its precursors in aqueous  $\text{NH}_4\text{HCO}_3$  (0.5 mL; 25 mM), incubation buffer (up to 5 mL) and purified enzyme solutions (GGPPS: 1 mL, CpTS1: 1 mL, IDI: 0.5 mL) as listed in Table S4. The reaction mixtures were incubated at 30 °C overnight, and the products were extracted with  $\text{C}_6\text{D}_6$  (200  $\mu\text{L}$ , three times) or hexane (200  $\mu\text{L}$ ), and then analysed by NMR and/or GC/MS.

**Table S4.** Labelling experiments with CpTS1 and CpTS2.

| entry | substrate                                                                        | enzymes                                          | results shown in    |
|-------|----------------------------------------------------------------------------------|--------------------------------------------------|---------------------|
| 1     | (1- $^{13}\text{C}$ )GGPP <sup>20</sup>                                          | CpTS1                                            | Figures S13 and S14 |
| 2     | (2- $^{13}\text{C}$ )GGPP <sup>21</sup>                                          | CpTS1                                            | Figures S13 and S14 |
| 3     | (3- $^{13}\text{C}$ )GGPP <sup>20</sup>                                          | CpTS1                                            | Figures S13 and S14 |
| 4     | (4- $^{13}\text{C}$ )GGPP <sup>20</sup>                                          | CpTS1                                            | Figures S13 and S14 |
| 5     | (1- $^{13}\text{C}$ )FPP <sup>22</sup> + IPP                                     | GGPPS, <sup>21</sup> CpTS1                       | Figures S13 and S14 |
| 6     | (2- $^{13}\text{C}$ )FPP <sup>22</sup> + IPP                                     | GGPPS, <sup>21</sup> CpTS1                       | Figures S13 and S14 |
| 7     | (3- $^{13}\text{C}$ )FPP <sup>22</sup> + IPP                                     | GGPPS, <sup>21</sup> CpTS1                       | Figures S13 and S14 |
| 8     | (4- $^{13}\text{C}$ )FPP <sup>22</sup> + IPP                                     | GGPPS, <sup>21</sup> CpTS1                       | Figures S13 and S14 |
| 9     | (1- $^{13}\text{C}$ )GPP <sup>23</sup> + IPP                                     | GGPPS, <sup>21</sup> CpTS1                       | Figures S13 and S14 |
| 10    | (6- $^{13}\text{C}$ )FPP <sup>22</sup> + IPP                                     | GGPPS, <sup>21</sup> CpTS1                       | Figures S13 and S14 |
| 11    | (7- $^{13}\text{C}$ )FPP <sup>22</sup> + IPP                                     | GGPPS, <sup>21</sup> CpTS1                       | Figures S13 and S14 |
| 12    | (8- $^{13}\text{C}$ )FPP <sup>22</sup> + IPP                                     | GGPPS, <sup>21</sup> CpTS1                       | Figures S13 and S14 |
| 13    | (9- $^{13}\text{C}$ )FPP <sup>22</sup> + IPP                                     | GGPPS, <sup>21</sup> CpTS1                       | Figures S13 and S14 |
| 14    | (10- $^{13}\text{C}$ )FPP <sup>22</sup> + IPP                                    | GGPPS, <sup>21</sup> CpTS1                       | Figures S13 and S14 |
| 15    | (11- $^{13}\text{C}$ )FPP <sup>22</sup> + IPP                                    | GGPPS, <sup>21</sup> CpTS1                       | Figures S13 and S14 |
| 16    | (12- $^{13}\text{C}$ )FPP <sup>22</sup> + IPP                                    | GGPPS, <sup>21</sup> CpTS1                       | Figures S13 and S14 |
| 17    | (9- $^{13}\text{C}$ )GPP <sup>24</sup> + IPP                                     | GGPPS, <sup>21</sup> CpTS1                       | Figures S13 and S14 |
| 18    | (14- $^{13}\text{C}$ )FPP <sup>22</sup> + IPP                                    | GGPPS, <sup>21</sup> CpTS1                       | Figures S13 and S14 |
| 19    | (15- $^{13}\text{C}$ )FPP <sup>22</sup> + IPP                                    | GGPPS, <sup>21</sup> CpTS1                       | Figures S13 and S14 |
| 20    | (20- $^{13}\text{C}$ )GGPP <sup>21</sup>                                         | CpTS1                                            | Figures S13 and S14 |
| 21    | (3- $^{13}\text{C}$ ,2- $^2\text{H}$ )GGPP <sup>21</sup>                         | CpTS1                                            | Figure 1A           |
| 22    | (3- $^{13}\text{C}$ ,2- $^2\text{H}$ )FPP <sup>15</sup> + IPP                    | GGPPS, <sup>21</sup> CpTS1                       | Figure 1B           |
| 23    | (2- $^{13}\text{C}$ )FPP <sup>22</sup> + (1,1- $^2\text{H}_2$ )IPP <sup>26</sup> | GGPPS, <sup>21</sup> CpTS1                       | Figure 1C           |
| 24    | ( <i>R</i> )-(1- $^{13}\text{C}$ ,1- $^2\text{H}$ )IPP <sup>27</sup>             | IDI, <sup>28</sup> GGPPS, <sup>21</sup><br>CpTS1 | Figures S15 and S16 |
| 25    | ( <i>S</i> )-(1- $^{13}\text{C}$ ,1- $^2\text{H}$ )IPP <sup>27</sup>             | IDI, <sup>28</sup> GGPPS, <sup>21</sup><br>CpTS1 | Figures S15 and S16 |
| 26    | DMAPP + ( <i>E</i> )-(4- $^{13}\text{C}$ ,4- $^2\text{H}$ )IPP <sup>29</sup>     | GGPPS, <sup>21</sup> CpTS1                       | Figure S17          |
| 27    | DMAPP + ( <i>Z</i> )-(4- $^{13}\text{C}$ ,4- $^2\text{H}$ )IPP <sup>29</sup>     | GGPPS, <sup>21</sup> CpTS1                       | Figure S17          |
| 28    | DMAPP + ( <i>E</i> )-(4- $^{13}\text{C}$ ,4- $^2\text{H}$ )IPP <sup>29</sup>     | FPPS, <sup>30</sup> CpTS2                        | Figure S28          |
| 29    | DMAPP + ( <i>Z</i> )-(4- $^{13}\text{C}$ ,4- $^2\text{H}$ )IPP <sup>29</sup>     | FPPS, <sup>30</sup> CpTS2                        | Figure S28          |

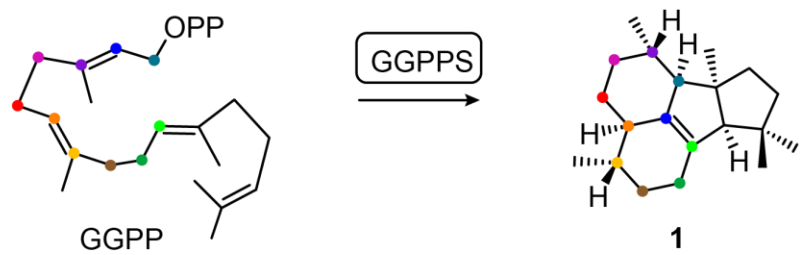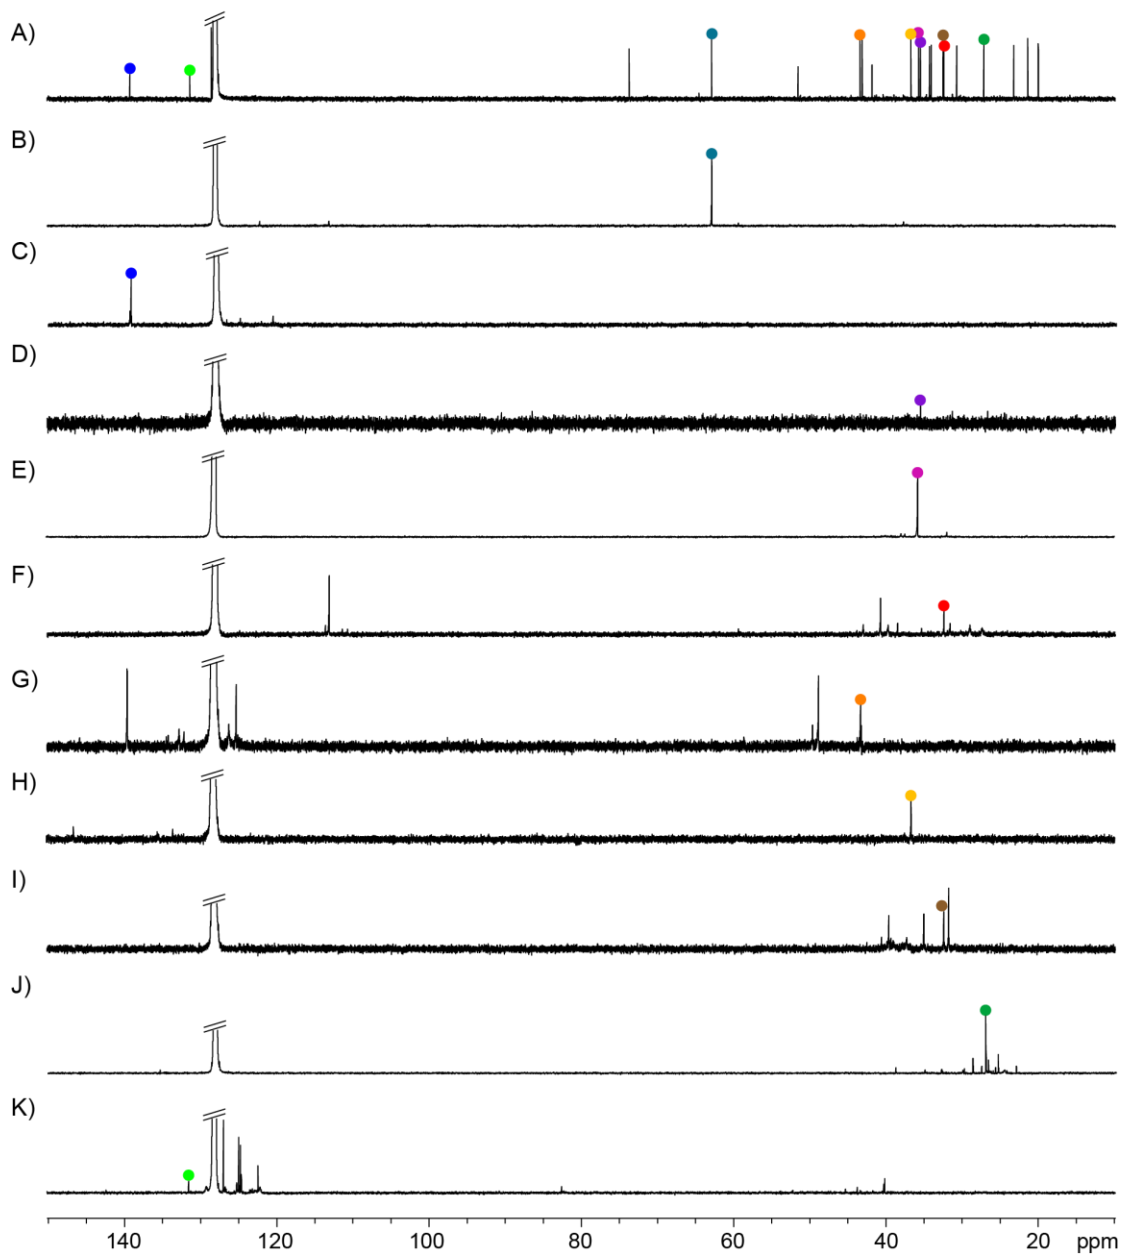

**Figure S13.**  $^{13}\text{C}$ -NMR spectra of A) unlabelled **1**, and B) to K) labelled **1** from the ten isotopomers of  $(^{13}\text{C})\text{GGPP}$  labelled at C1 – C10. Coloured dots correlate peaks to the individual carbons of **1**.

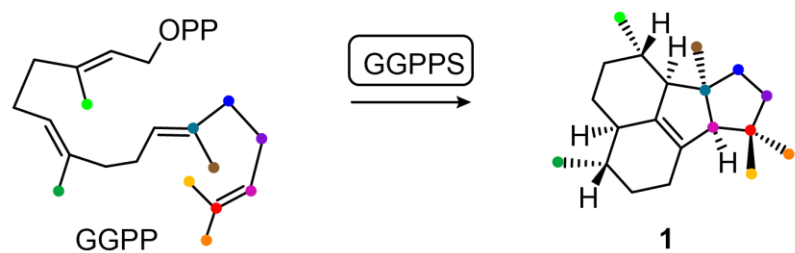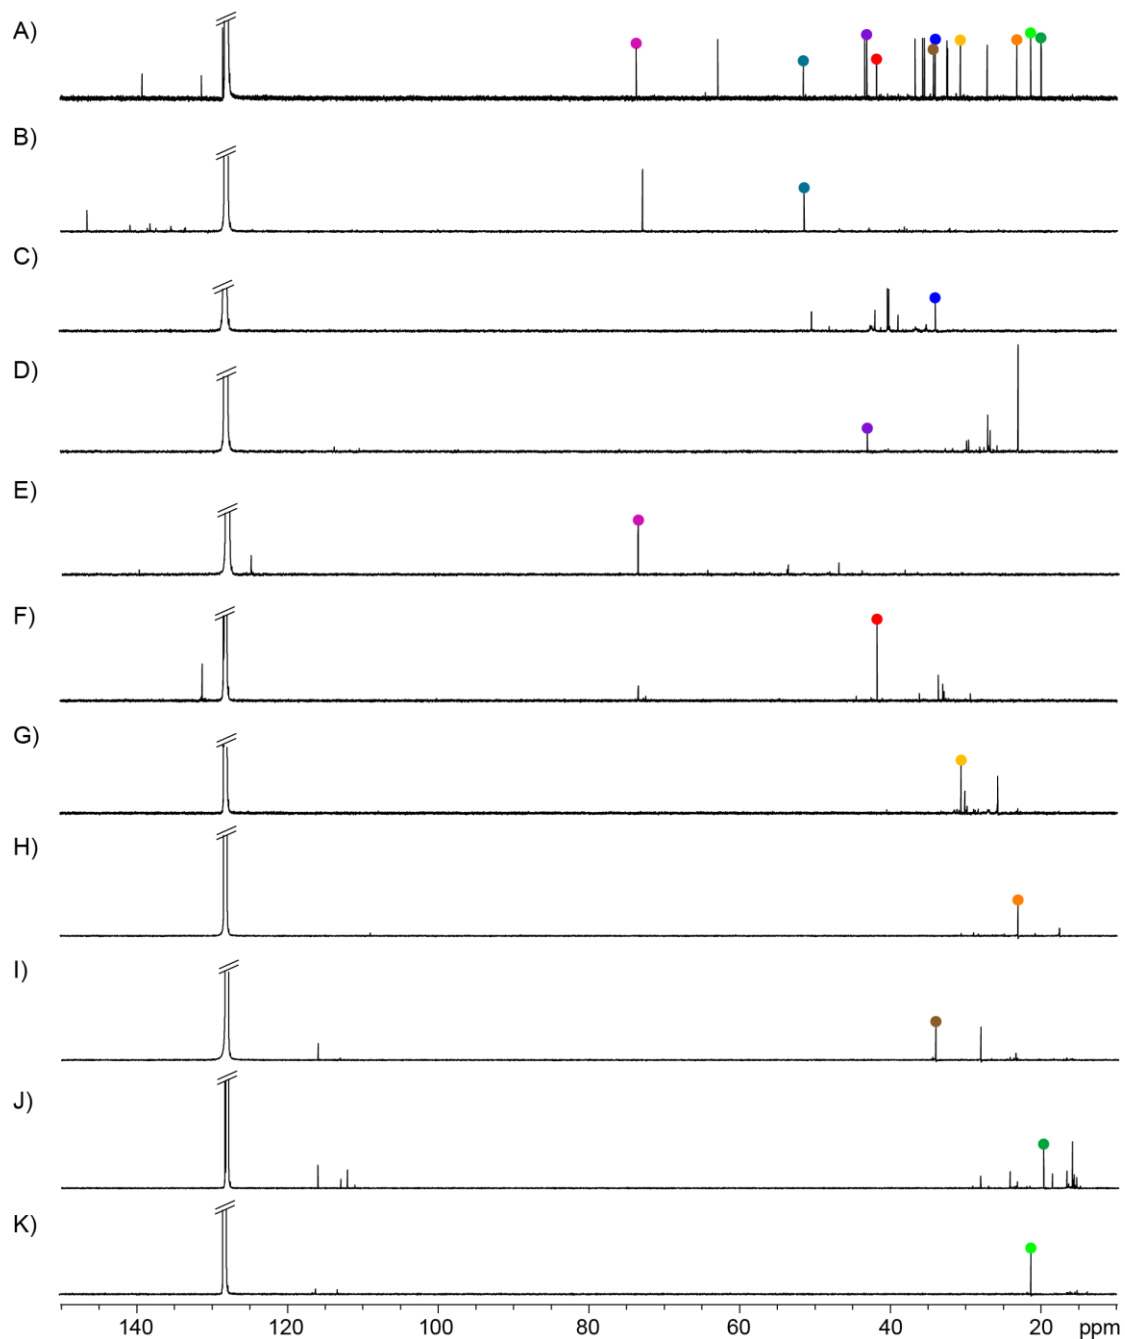

**Figure S14.**  $^{13}\text{C}$ -NMR spectra of A) unlabelled **1**, and B) to K) labelled **1** from the ten isotopomers of ( $^{13}\text{C}$ )GGPP labelled at C11 – C20. Coloured dots correlate peaks to the individual carbons of **1**.

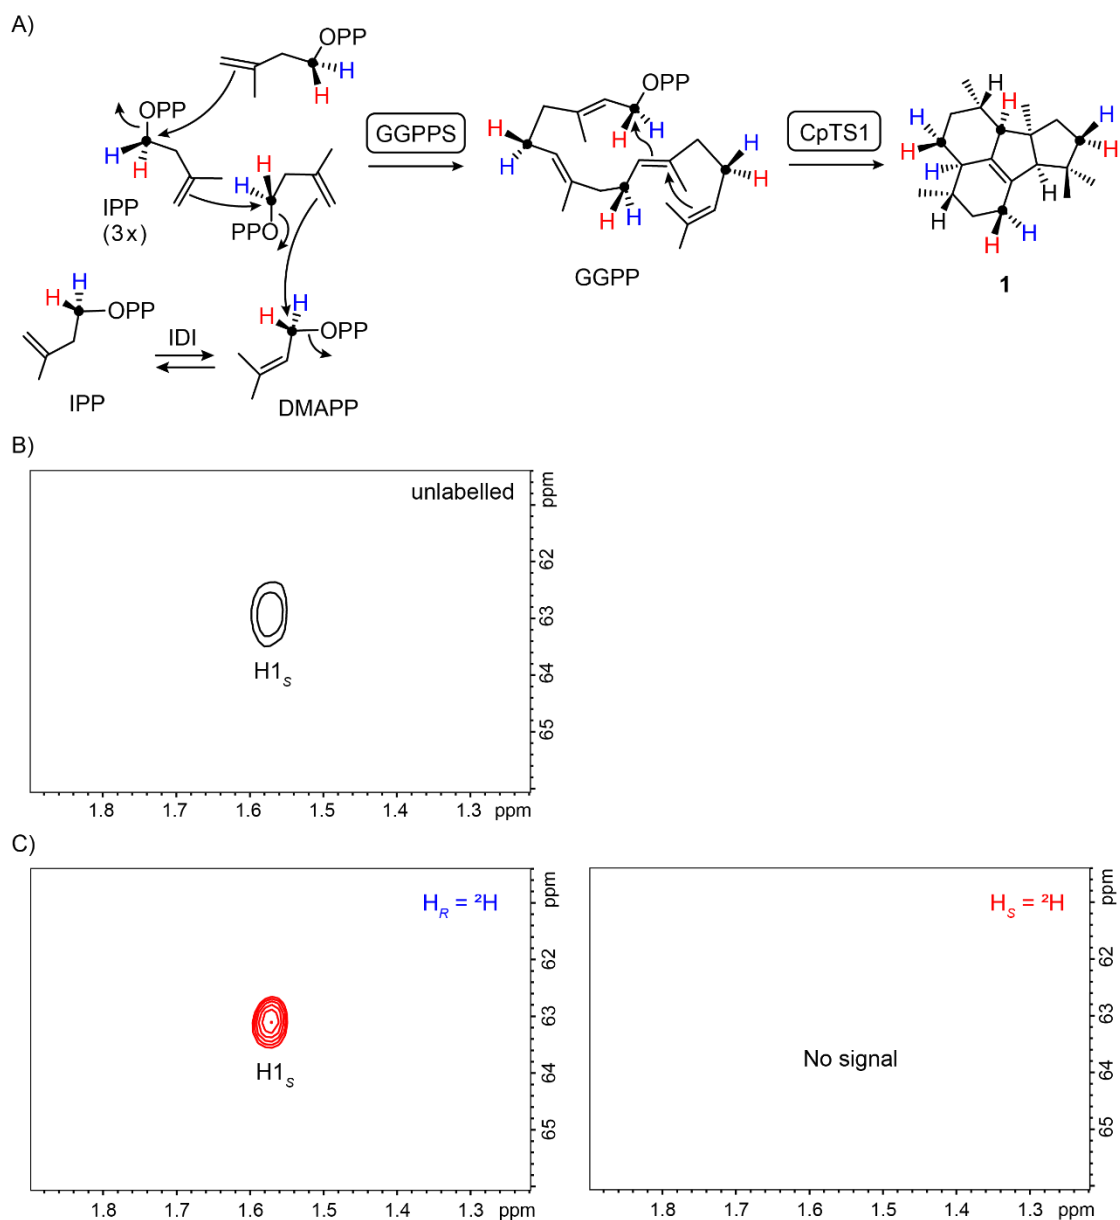

**Figure S15.** The 1,3-hydride shift from **H** to **I**. A) Formation of labelled **1** from (*R*)- or (*S*)-( $1\text{-}^{13}\text{C}, 1\text{-}^2\text{H}$ )IPP with IDI, GGPPS and CpTS1. Partial HSQC spectra of B) unlabelled **1** showing the crosspeak for the hydrogen bound to C1, C) labelled **1** obtained from (*R*)-( $1\text{-}^{13}\text{C}, 1\text{-}^2\text{H}$ )IPP, and D) labelled **1** obtained from (*S*)-( $1\text{-}^{13}\text{C}, 1\text{-}^2\text{H}$ )IPP. The observed signal for H1 in the experiment with (*R*)-( $1\text{-}^{13}\text{C}, 1\text{-}^2\text{H}$ )IPP and the missing signal in the experiment with (*S*)-( $1\text{-}^{13}\text{C}, 1\text{-}^2\text{H}$ )IPP confirm the selective migration of the 1-*pro-R* hydrogen in the hydride shift from **H** to **I**.

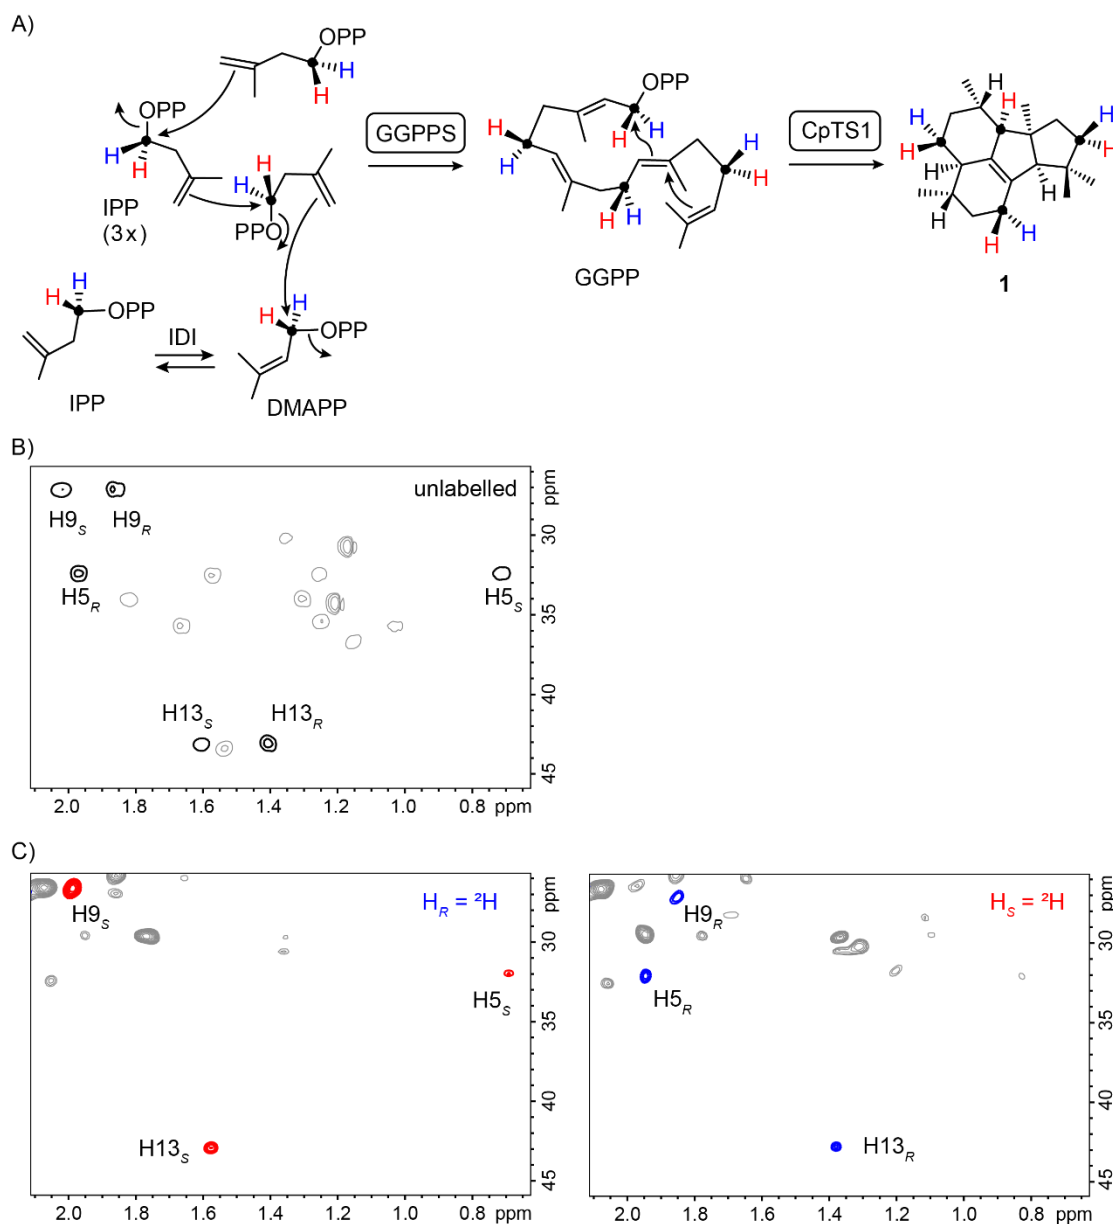

**Figure S16.** The absolute configuration of **1**. A) Formation of labelled **1** from (*R*)- or (*S*)-( $^{13}\text{C}$ , $^{1-2}\text{H}$ )IPP with IDI, GGPPS and CpTS1. B) Partial HSQC spectrum of unlabelled **1** showing the crosspeaks for the hydrogens at C5, C9 and C13. C) HSQC spectra for labelled **1** obtained from (*R*)- and (*S*)-( $^{13}\text{C}$ , $^{1-2}\text{H}$ )IPP. As a result of the enantioselective deuteration, in each labelling experiment one of the two crosspeaks is vanished, while the second crosspeak shows slight upfield shifts in both dimensions ( $^1\text{H}$  and  $^{13}\text{C}$  chemical shifts). From the known absolute configuration at the deuterated carbons C5, C9 and C13 the absolute configuration of **1** can be inferred. Black dots represent  $^{13}\text{C}$ -labelled carbons.

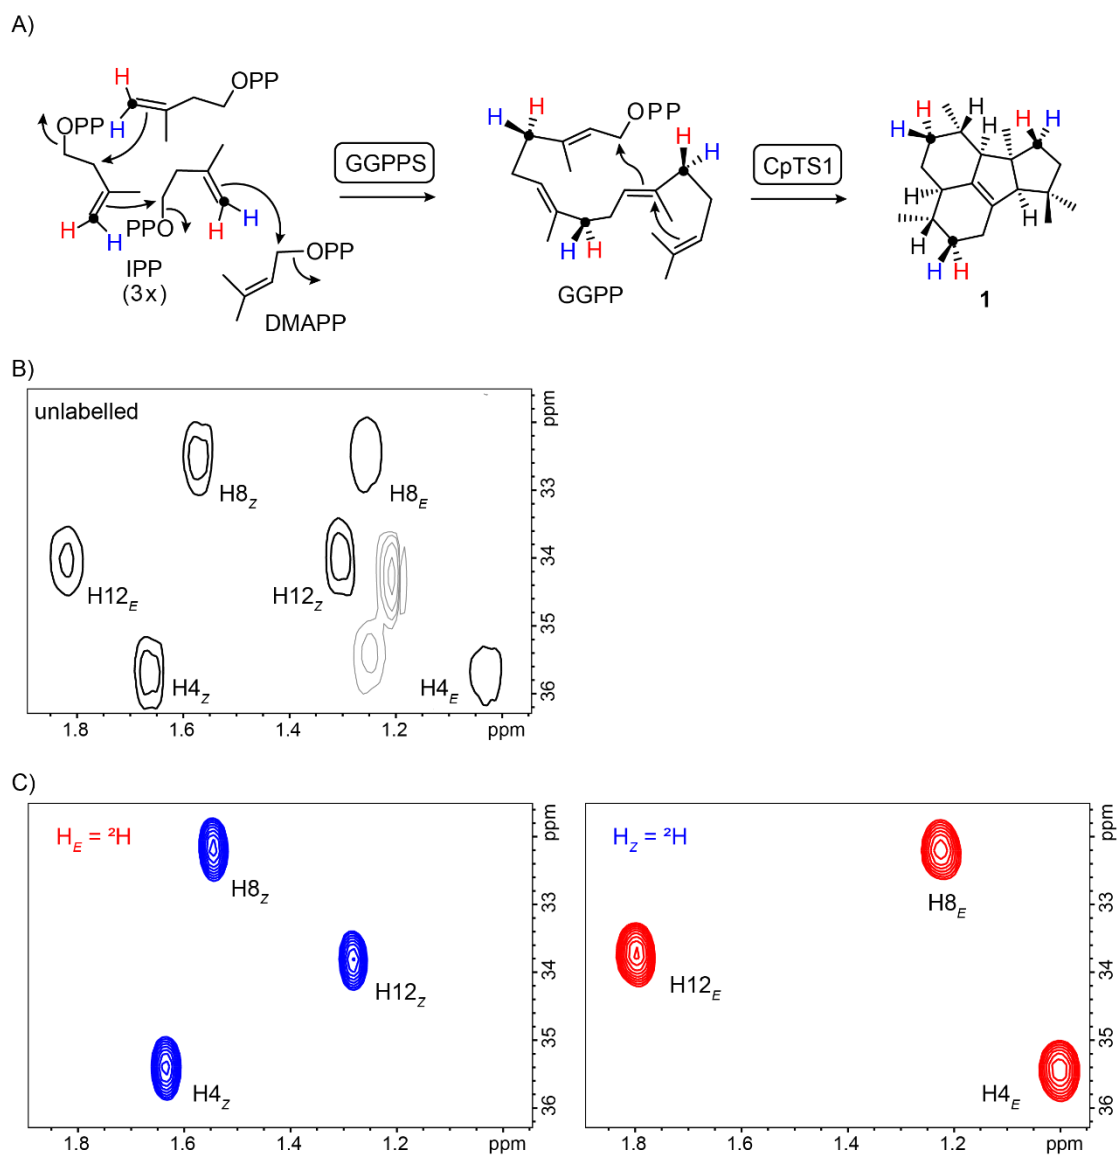

**Figure S17.** The absolute configuration of **1**. A) Formation of labelled **1** from DMAPP and (*E*)- or (*Z*)-( $4\text{-}^{13}\text{C},4\text{-}^2\text{H}$ )IPP with GGPPS and CpTS1. B) Partial HSQC spectrum of unlabelled **1** showing the crosspeaks for the hydrogens at C4, C8 and C12. C) HSQC spectra for labelled **1** obtained from (*E*)- and (*Z*)-( $4\text{-}^{13}\text{C},4\text{-}^2\text{H}$ )IPP. As a result of the enantioselective deuteration, in each labelling experiment one of the two crosspeaks is vanished, while the second crosspeak shows slight upfield shifts in both dimensions ( $^1\text{H}$  and  $^{13}\text{C}$  chemical shifts). From the known absolute configuration at the deuterated carbons C4, C8 and C12 the absolute configuration of **1** can be inferred. Black dots represent  $^{13}\text{C}$ -labelled carbons.



MLNTPYFIIPNTLRNWPWKRVLNPHQVCEEEAADMRS CGAFTPKSQDAFDRCAFGLLGS LAYP  
HLGRDGLRIACDLMNMFFV**IDEYSD**VASGREARLQADIVMDALHTPLEPRPAGEWIGGEVTRQFW  
ANAIRTATPSSQRRFVRNFQRYVDAVVQQAQDREIHCIRDVKS YFIL**RR**QTIGAIPSLDLLTLEM  
DLEDEVLDHP IIVAKLLELCVDMILIG**NDLYSYNVE**QARGDDTHNFVRIVKDERKCNLNDALQWIS  
DYHDLADEFLNLMHNLPSFGSDLIDEQVKIYVDGLGNWVRANECWSFESE**RY**FGKKGKLYLKSR  
RIRLLPSSIALQGQNIDSQA AVDISDLPAAGIIV

**Figure S18.** Amino acid sequence of CpTS2 from *Clitopilus passeckerianus* (accession number PP777466). Highly conserved motifs are highlighted in bold.

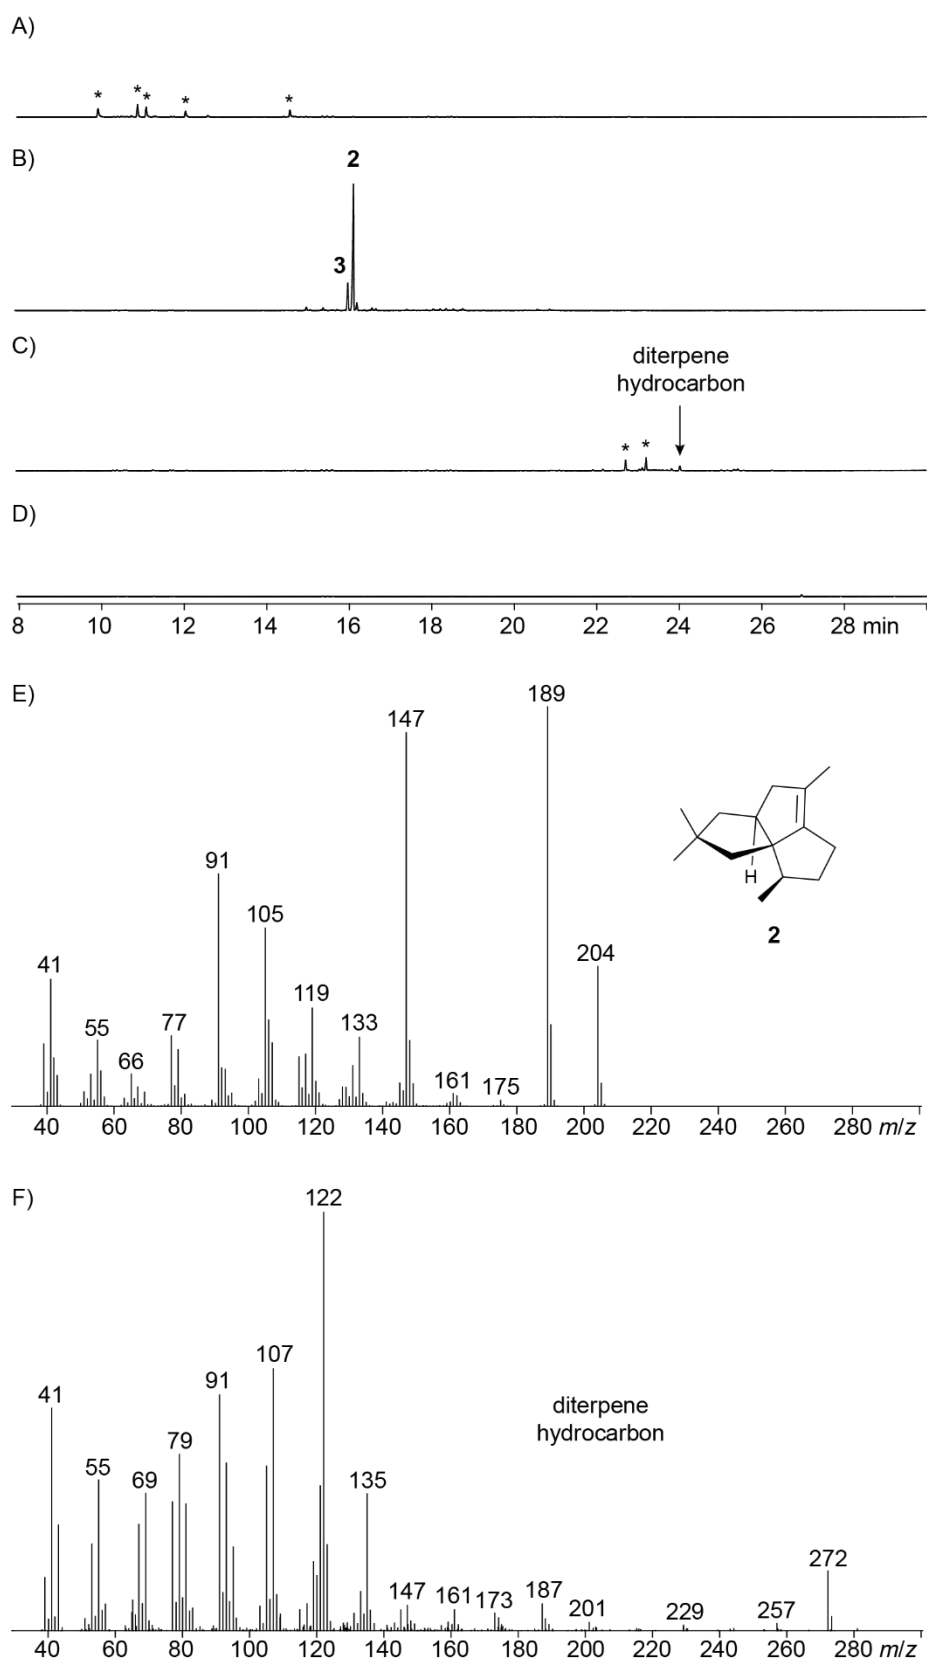

**Figure S19.** Substrate screening for CpTS2. Chromatograms of extracts obtained from an incubation of A) GPP, B) FPP, C) GGPP, and D) GFPP with CpTS2. EI mass spectra of E) isopentalenene (**1**) and F) an unidentified diterpene hydrocarbon. Asterisks indicate spontaneous hydrolysis products and contaminants such as plasticisers.

**Table S5.** GC/MS identification of terpenes formed from FPP by CpTS2.

| Compound                                  | <i>I</i> <sup>[a]</sup> | <i>I</i> (lit.) <sup>[b]</sup> | MS match <sup>[c]</sup> |
|-------------------------------------------|-------------------------|--------------------------------|-------------------------|
| C <sub>15</sub> H <sub>24</sub> (unknown) | 1281                    | –                              | –                       |
| C <sub>15</sub> H <sub>24</sub> (unknown) | 1308                    | –                              | –                       |
| pentalenene                               | 1351                    | 1339 <sup>31</sup>             | 922                     |
| isopentalenene                            | 1361                    | –                              | –                       |
| C <sub>15</sub> H <sub>24</sub> (unknown) | 1368                    | –                              | –                       |
| protoillud-6-ene                          | 1388                    | 1367 <sup>32</sup>             | 842                     |
| asterisca-2(9),6-diene                    | 1393                    | 1381 <sup>30</sup>             | 839                     |
| C <sub>15</sub> H <sub>24</sub> (unknown) | 1401                    | –                              | –                       |

[a] Retention index on a HP5-MS GC column. [b] Retention index data from the literature on the same or a similar GC column. [c] Mass spectral match factor (0 – 999, 999 indicates identical mass spectra).

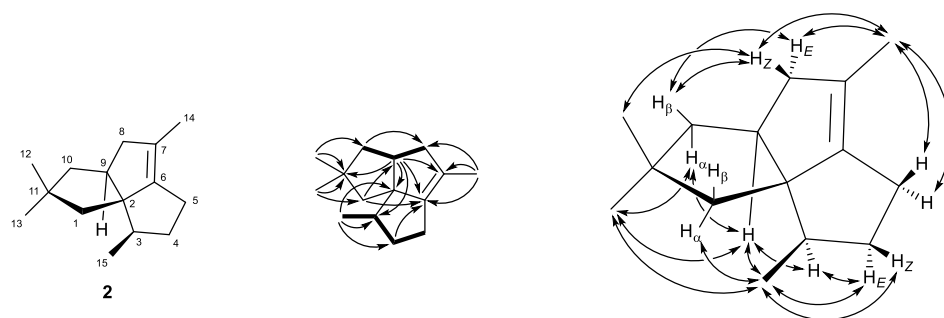

**Figure S20.** Structure elucidation of **2**.

**Table S6.** NMR data of isopentalenene (**2**) in C<sub>6</sub>D<sub>6</sub> recorded at 298 K.

| C <sup>[a]</sup> | type            | <sup>13</sup> C <sup>[b]</sup> | <sup>1</sup> H <sup>[b]</sup>                                                                                                  |
|------------------|-----------------|--------------------------------|--------------------------------------------------------------------------------------------------------------------------------|
| 1                | CH <sub>2</sub> | 42.29                          | 1.43 (m, H <sub>α</sub> )<br>1.21 (d, <i>J</i> = 13.0, H <sub>β</sub> )                                                        |
| 2                | C <sub>q</sub>  | 71.31                          | –                                                                                                                              |
| 3                | CH              | 41.66                          | 1.50 (m)                                                                                                                       |
| 4                | CH <sub>2</sub> | 34.71                          | 1.87 (dddd, <i>J</i> = 12.4, 8.6, 7.6, 3.2, H <sub>E</sub> )<br>1.36 (dddd, <i>J</i> = 12.4, 11.4, 11.4, 6.8, H <sub>Z</sub> ) |
| 5                | CH <sub>2</sub> | 21.56                          | 2.07 (m, 2H)                                                                                                                   |
| 6                | C <sub>q</sub>  | 149.24                         | –                                                                                                                              |
| 7                | C <sub>q</sub>  | 124.87                         | –                                                                                                                              |
| 8                | CH <sub>2</sub> | 50.03                          | 2.70 (ddm, <i>J</i> = 16.3, 10.0, H <sub>E</sub> )<br>2.43 (m, H <sub>Z</sub> )                                                |
| 9                | CH              | 43.88                          | 2.38 (m)                                                                                                                       |
| 10               | CH <sub>2</sub> | 49.87                          | 1.69 (dd, <i>J</i> = 12.8, 8.7, H <sub>α</sub> )<br>1.43 (m, H <sub>β</sub> )                                                  |
| 11               | C <sub>q</sub>  | 40.66                          | –                                                                                                                              |
| 12               | CH <sub>3</sub> | 31.10                          | 1.05 (s)                                                                                                                       |
| 13               | CH <sub>3</sub> | 29.29                          | 1.17 (s)                                                                                                                       |
| 14               | CH <sub>3</sub> | 14.26                          | 1.53 (br s)                                                                                                                    |
| 15               | CH <sub>3</sub> | 14.77                          | 0.89 (d, <i>J</i> = 6.7)                                                                                                       |

[a] Carbon numbering as shown in Figure S20. [b] Chemical shifts  $\delta$  in ppm, multiplicity: s = singlet, d = doublet, m = multiplet, br = broad, coupling constants *J* are given in Hertz.

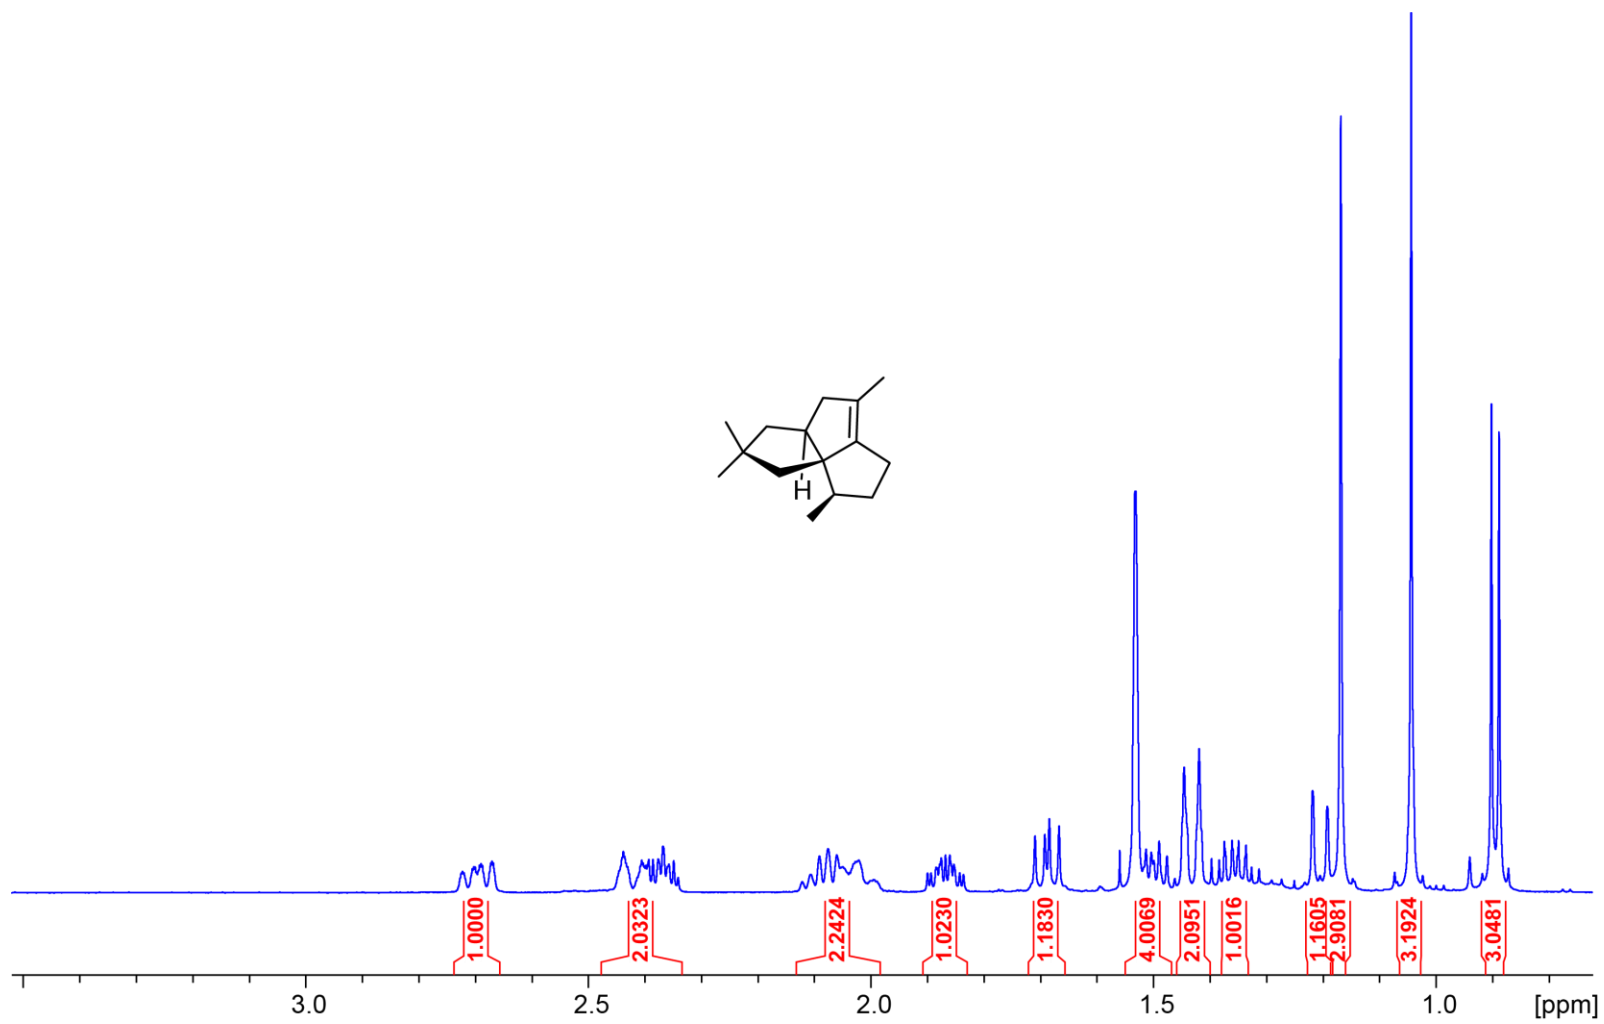

**Figure S21.** <sup>1</sup>H-NMR spectrum of **2** (500 MHz, C<sub>6</sub>D<sub>6</sub>).

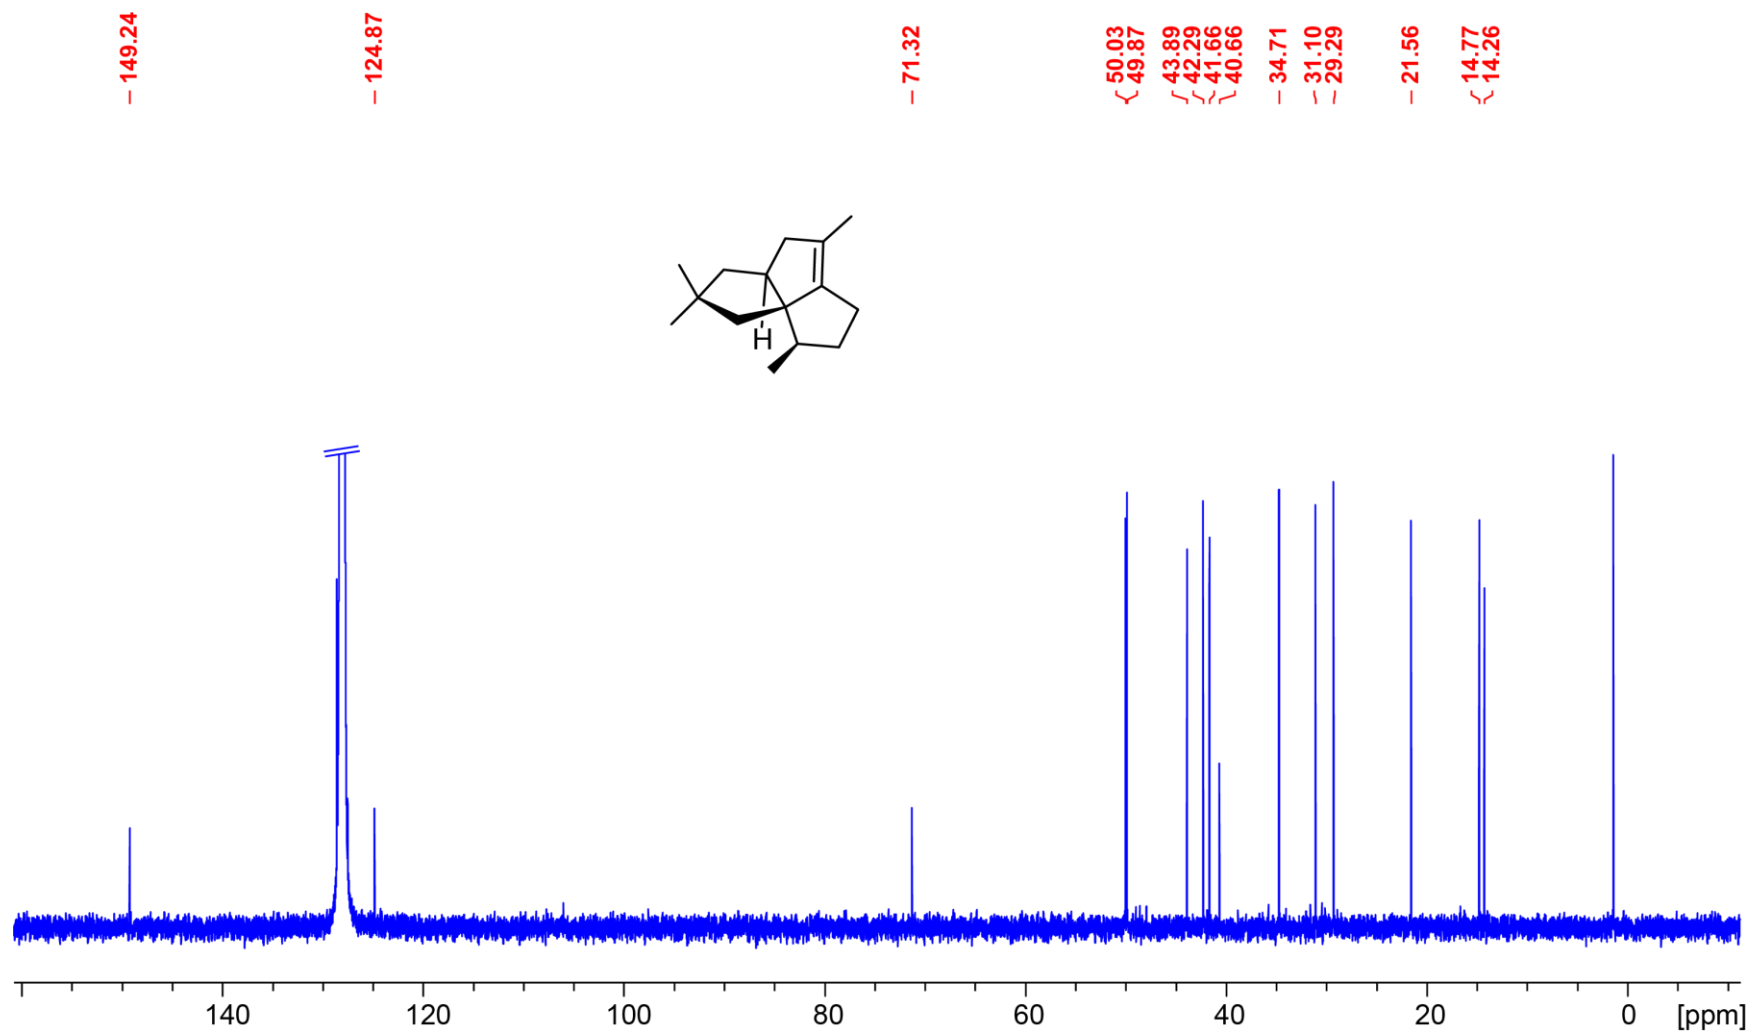

Figure S22.  $^{13}\text{C}$ -NMR spectrum of **1** (125 MHz,  $\text{C}_6\text{D}_6$ ).

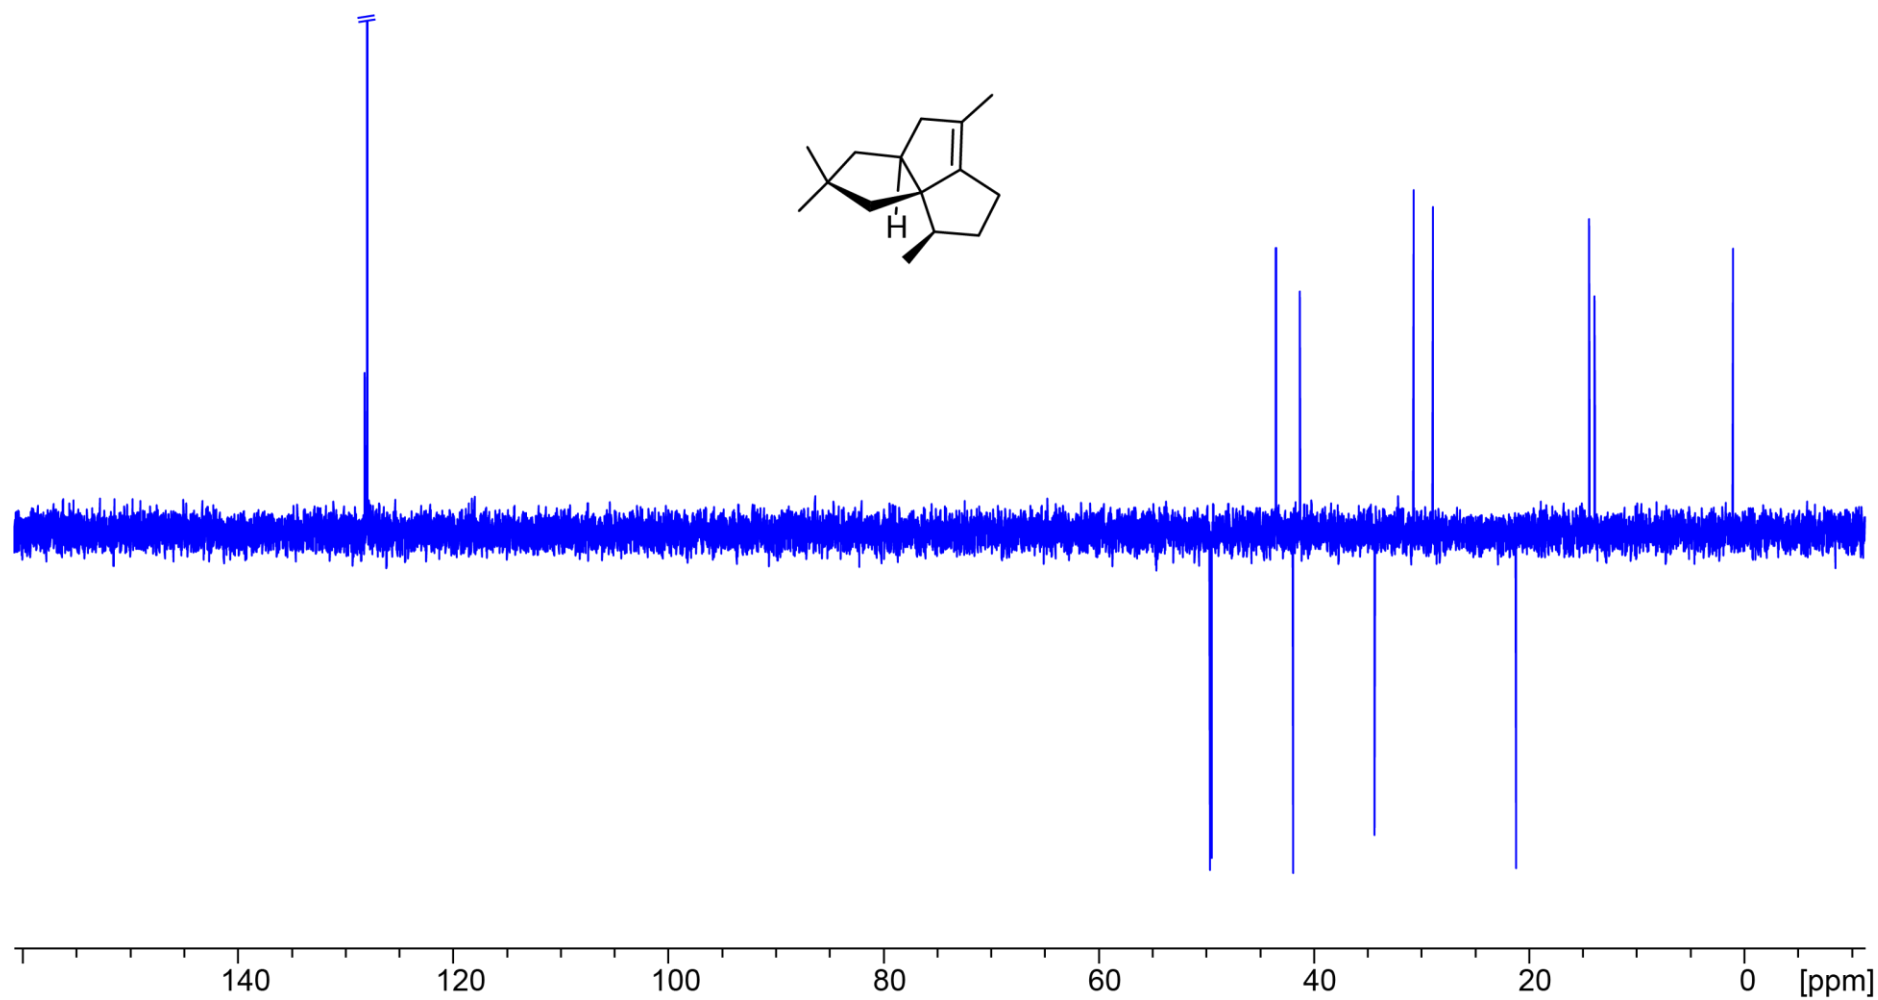

**Figure S23.** <sup>13</sup>C-DEPT spectrum of **1** (125 MHz, C<sub>6</sub>D<sub>6</sub>).

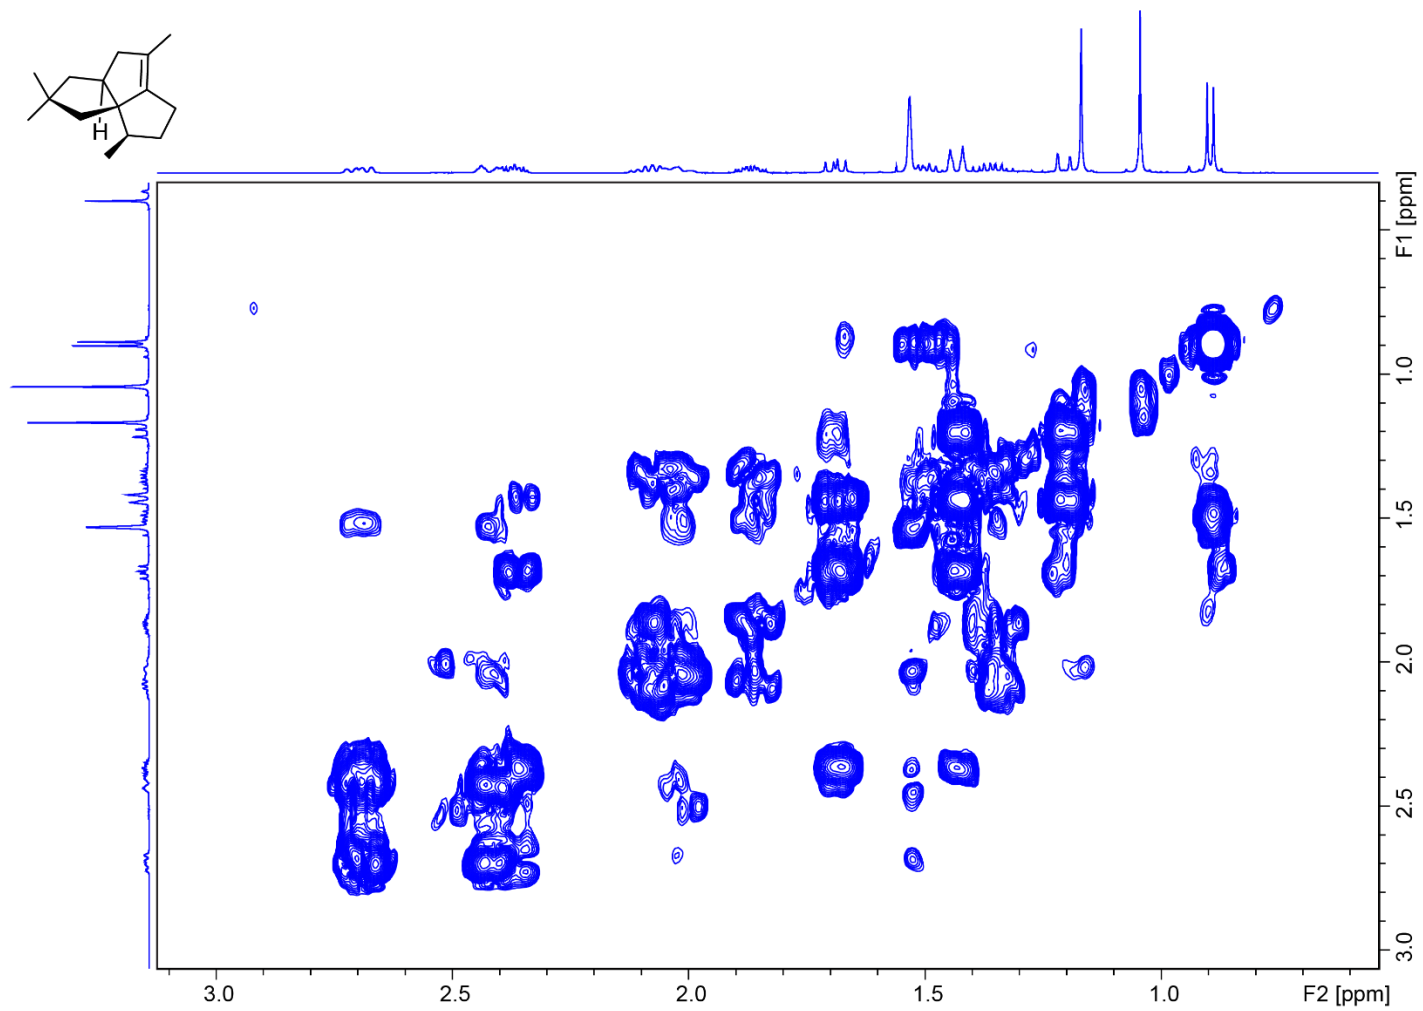

**Figure S24.**  $^1\text{H}$ ,  $^1\text{H}$ -COSY spectrum of **1** (500 MHz,  $\text{C}_6\text{D}_6$ ).



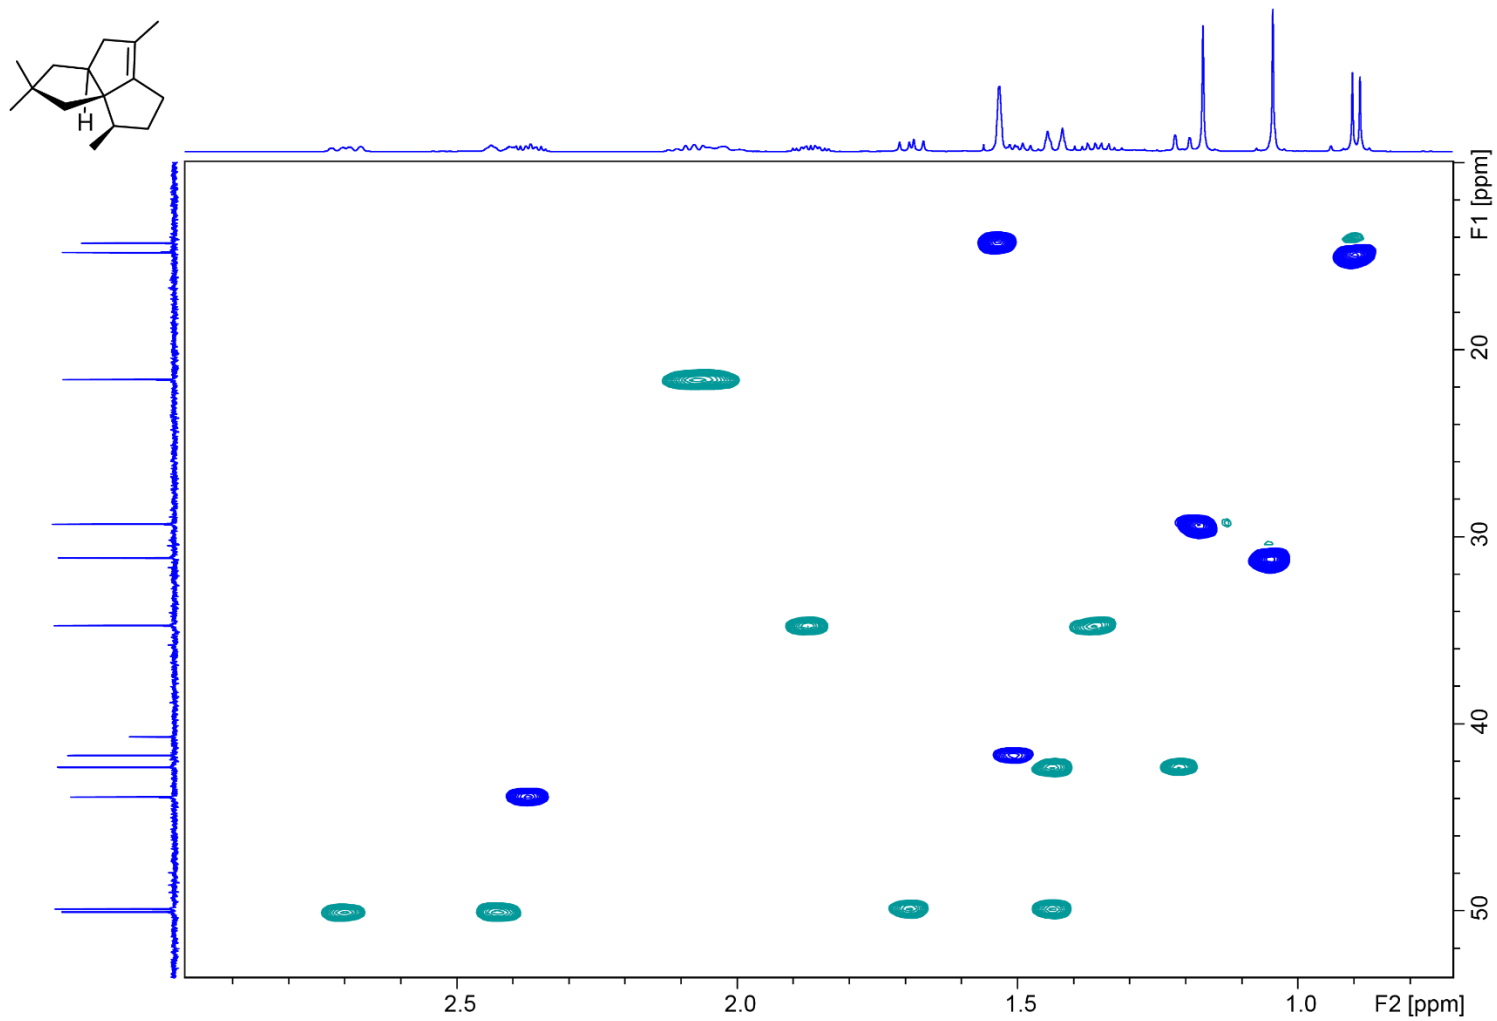

Figure S25. HSQC spectrum of 1 ( $C_6D_6$ ).

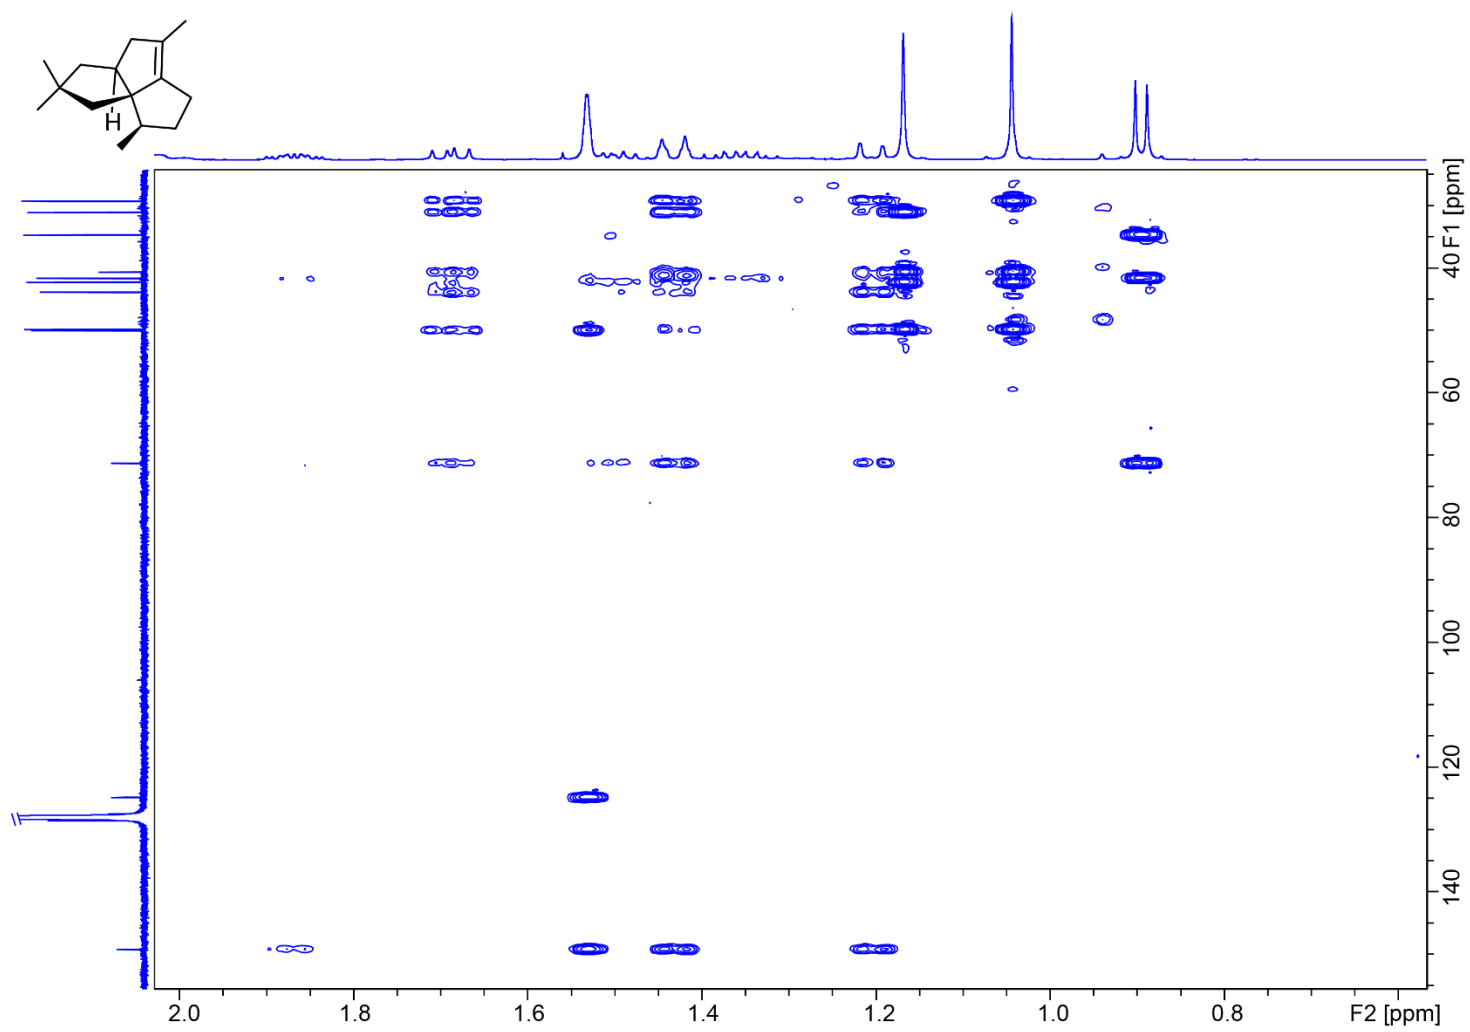

Figure S26. HMBC spectrum of **1** ( $C_6D_6$ ).

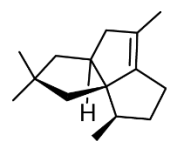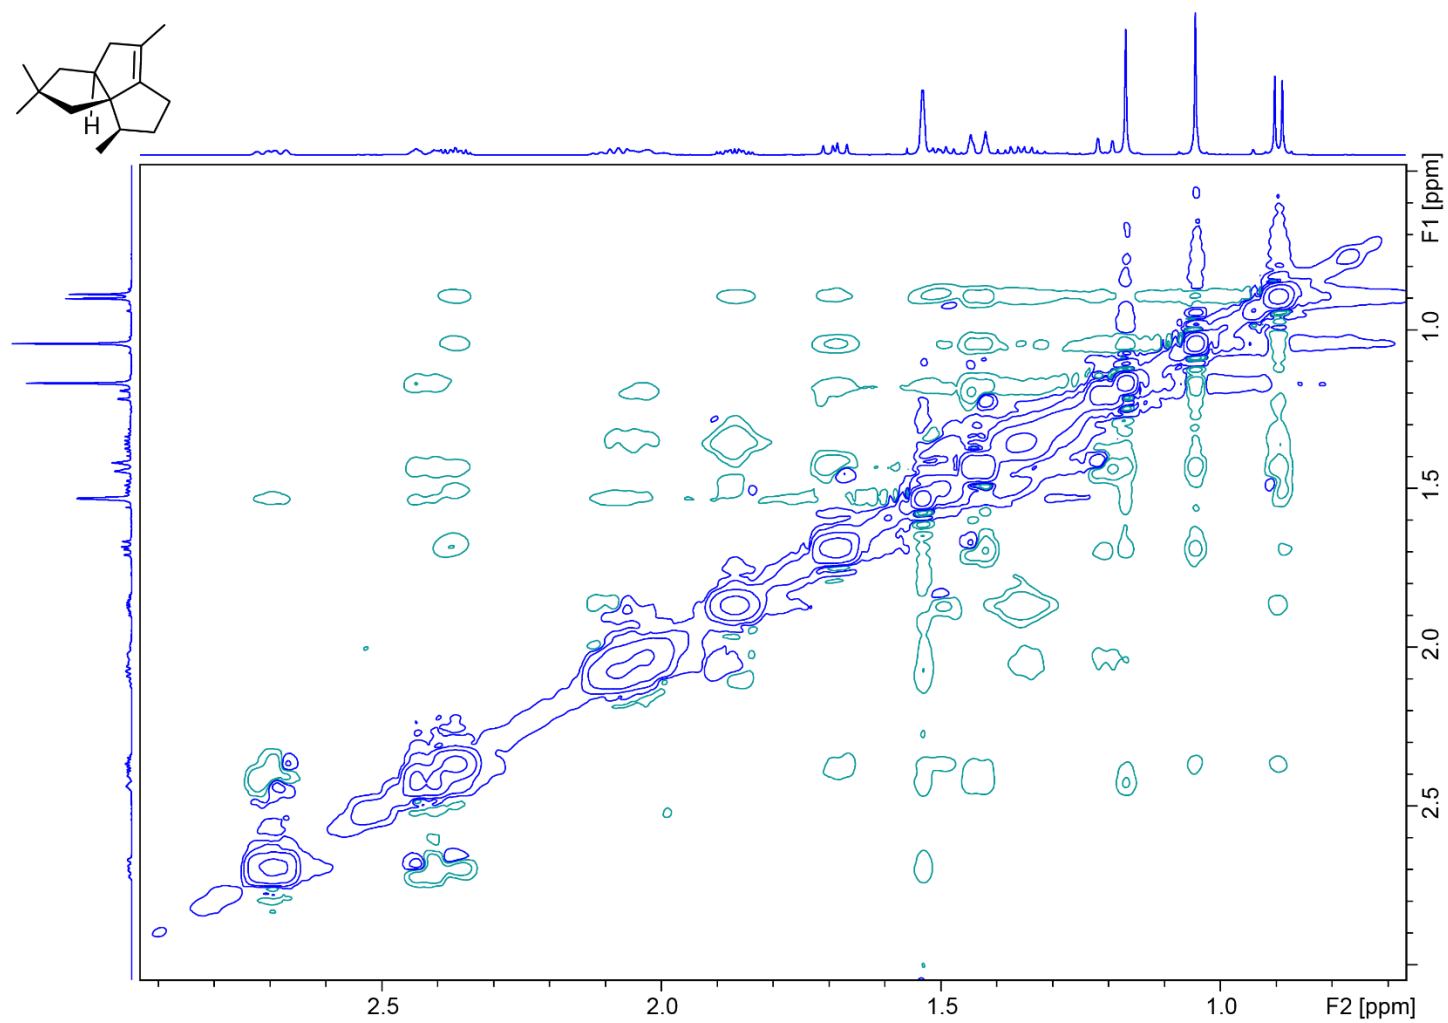

Figure S27. NOESY spectrum of 1 (C<sub>6</sub>D<sub>6</sub>).

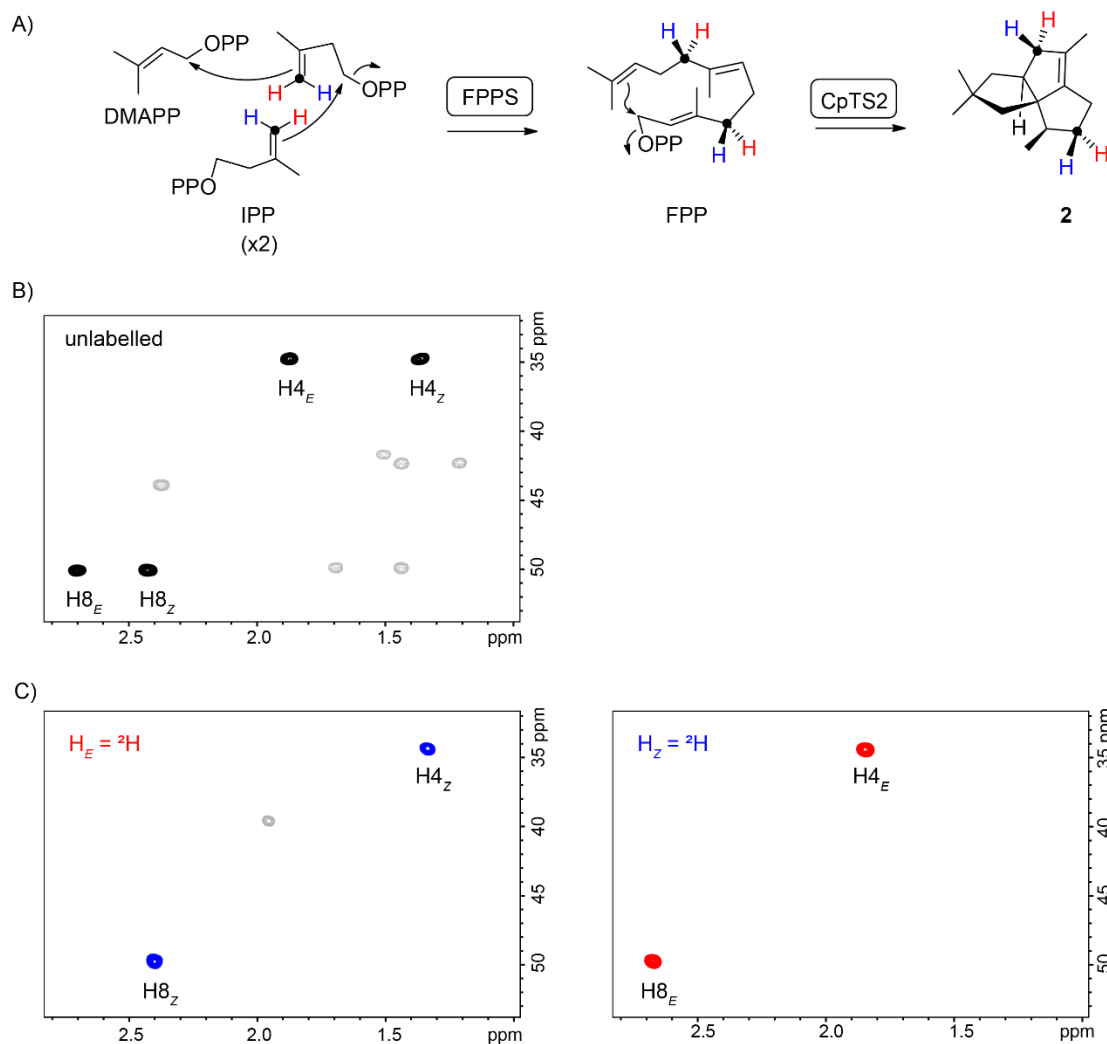

**Figure S28.** The absolute configuration of **2**. A) Formation of labelled **2** from DMAPP and (*E*)- or (*Z*)-( $4\text{-}^{13}\text{C},4\text{-}^2\text{H}$ )IPP with FPPS and CpTS2. B) Partial HSQC spectrum of unlabelled **2** showing the crosspeaks for the hydrogens at C4 and C8. C) HSQC spectra for labelled **2** obtained from (*E*)- and (*Z*)-( $4\text{-}^{13}\text{C},4\text{-}^2\text{H}$ )IPP. As a result of the enantioselective deuteration, in each labelling experiment one of the two crosspeaks is vanished, while the second crosspeak shows slight upfield shifts in both dimensions ( $^1\text{H}$  and  $^{13}\text{C}$  chemical shifts). From the known absolute configuration at the deuterated carbons C4 and C8 the absolute configuration of **2** can be inferred. Black dots represent  $^{13}\text{C}$ -labelled carbons.

### Cartesian coordinates

Cartesian coordinates, Gibbs energies (G"..." in Hartree) and imaginary frequencies of transition states (T-"..." in cm<sup>-1</sup>) (mPW1PW91/6-311+G(d,p)//B97D3/6-31G(d,p)-sp-density-fitting, 1 bar, 298.15 K)

#### A (G781.709854E\_MeAcr11qn\_mAPW)

|   |           |           |           |
|---|-----------|-----------|-----------|
| C | -0.710983 | 1.769821  | -1.001870 |
| C | 0.353692  | 2.597518  | -0.224624 |
| C | 1.749170  | 2.009437  | -0.207357 |
| C | 1.022583  | -1.441218 | 0.954112  |
| C | -0.048457 | -1.966626 | 0.038603  |
| C | -0.538973 | -0.938571 | -1.049725 |
| H | 1.569070  | 1.476880  | 1.806742  |
| H | -1.616960 | 2.394833  | -1.040214 |
| H | -0.005669 | 2.738309  | 0.807797  |
| C | 2.222794  | 1.442240  | 0.925818  |
| C | 2.366633  | -1.523586 | 0.814879  |
| H | -0.907881 | -2.286360 | 0.653476  |
| C | 3.253742  | -0.708273 | 1.739487  |
| C | 3.517463  | 0.709496  | 1.145567  |
| H | 4.217696  | -1.210647 | 1.908310  |
| H | 4.096602  | 0.621518  | 0.215892  |
| H | 0.672020  | -0.875163 | 1.823811  |
| C | 3.077359  | -2.292135 | -0.269732 |
| H | 3.805515  | -2.986175 | 0.177536  |
| H | 2.405287  | -2.870456 | -0.911991 |
| H | 3.656891  | -1.613515 | -0.916037 |
| H | 2.770221  | -0.592039 | 2.722077  |
| H | 0.285881  | -2.867674 | -0.496872 |
| H | 4.151818  | 1.266969  | 1.855270  |
| H | 0.380851  | 3.597129  | -0.690564 |
| H | -0.402918 | 1.645287  | -2.048397 |
| C | -1.063250 | 0.391703  | -0.360012 |
| H | -0.657395 | 0.423537  | 0.660298  |
| C | 0.589344  | -0.737831 | -2.070121 |
| H | 0.871038  | -1.705253 | -2.506081 |
| H | 0.286209  | -0.086702 | -2.899307 |
| H | 1.474741  | -0.309065 | -1.593778 |
| C | -1.800944 | -1.511743 | -1.738496 |
| H | -1.706917 | -2.583836 | -1.965266 |
| H | -1.991047 | -0.977600 | -2.682466 |
| C | -2.617148 | 0.248211  | -0.300425 |
| H | -3.104448 | 0.889577  | -1.051739 |
| C | -2.972412 | -1.255543 | -0.782562 |
| H | -2.966473 | -1.961971 | 0.058186  |
| H | -3.965025 | -1.277234 | -1.244399 |
| C | -3.322516 | 0.337579  | 0.964562  |
| C | -4.751383 | 0.728745  | 0.989365  |
| H | -4.841599 | 1.657109  | 1.584840  |
| H | -5.174519 | 0.906212  | -0.004042 |
| H | -5.350859 | -0.014033 | 1.539499  |
| C | -2.664133 | 0.003565  | 2.250513  |

|   |           |           |           |
|---|-----------|-----------|-----------|
| H | -1.895491 | -0.771688 | 2.135557  |
| H | -2.121075 | 0.908370  | 2.584688  |
| H | -3.376098 | -0.263069 | 3.039127  |
| C | 2.538806  | 2.152431  | -1.488691 |
| H | 1.920983  | 1.945399  | -2.373502 |
| H | 2.893778  | 3.190563  | -1.592926 |
| H | 3.417452  | 1.499462  | -1.531270 |

**A-TS (TS\_G781.690804T-152\_MeAcr11\_mABPW)**

|   |           |           |           |
|---|-----------|-----------|-----------|
| C | 0.327505  | 2.161519  | 0.549079  |
| C | -0.833944 | 2.652728  | -0.354671 |
| C | -2.118988 | 1.861157  | -0.199707 |
| C | -0.856745 | -1.604602 | -0.632102 |
| C | 0.303012  | -1.788902 | 0.303777  |
| C | 0.764008  | -0.523493 | 1.115050  |
| H | -1.898667 | 0.997021  | -2.089317 |
| H | 1.115417  | 2.930458  | 0.512367  |
| H | -0.500699 | 2.637193  | -1.404236 |
| C | -2.520870 | 1.032852  | -1.185669 |
| C | -2.172579 | -1.800753 | -0.387615 |
| H | 1.154208  | -2.193673 | -0.262243 |
| C | -3.186394 | -1.384216 | -1.436291 |
| C | -3.680533 | 0.076742  | -1.193190 |
| H | -4.055389 | -2.058917 | -1.432732 |
| H | -4.254533 | 0.123996  | -0.257809 |
| H | -0.609035 | -1.261376 | -1.642636 |
| C | -2.743334 | -2.325503 | 0.905742  |
| H | -3.386593 | -3.196065 | 0.707195  |
| H | -1.983790 | -2.625646 | 1.635330  |
| H | -3.387256 | -1.569689 | 1.382700  |
| H | -2.735090 | -1.438197 | -2.438846 |
| H | 0.071569  | -2.547901 | 1.066537  |
| H | -4.382551 | 0.334727  | -2.002969 |
| H | -1.012746 | 3.709752  | -0.095328 |
| H | -0.000288 | 2.130841  | 1.593645  |
| C | 0.940613  | 0.791133  | 0.107240  |
| H | 0.456927  | 0.468904  | -0.827469 |
| C | -0.259282 | -0.236165 | 2.215783  |
| H | -0.374729 | -1.134375 | 2.837498  |
| H | 0.053908  | 0.577485  | 2.880737  |
| H | -1.236824 | 0.004109  | 1.787360  |
| C | 2.156720  | -0.802553 | 1.730987  |
| H | 2.124660  | -1.757798 | 2.277810  |
| H | 2.392314  | -0.024880 | 2.471896  |
| C | 2.386983  | 0.930914  | -0.071559 |
| H | 2.881657  | 1.683488  | 0.559511  |
| C | 3.294486  | -0.902025 | 0.701460  |
| H | 3.313797  | -1.881179 | 0.209582  |
| H | 4.265466  | -0.678003 | 1.149346  |
| C | 3.279317  | 0.067883  | -0.774393 |
| C | 4.714112  | 0.568003  | -0.978174 |
| H | 4.763675  | 1.176760  | -1.890667 |
| H | 5.065476  | 1.175751  | -0.134921 |

|   |           |           |           |
|---|-----------|-----------|-----------|
| H | 5.397309  | -0.280728 | -1.107234 |
| C | 2.771653  | -0.737817 | -1.971354 |
| H | 1.734812  | -1.067029 | -1.876646 |
| H | 2.845612  | -0.107096 | -2.867602 |
| H | 3.405741  | -1.617504 | -2.136330 |
| C | -2.889669 | 2.111414  | 1.078305  |
| H | -2.233004 | 2.126270  | 1.960545  |
| H | -3.371076 | 3.101665  | 1.037773  |
| H | -3.676706 | 1.371740  | 1.260953  |

**B (G781.704738E\_MeAcr11qp\_mBPW)**

|   |           |           |           |
|---|-----------|-----------|-----------|
| C | 0.453625  | 1.924018  | 0.704469  |
| C | -0.672896 | 2.686529  | -0.029062 |
| C | -1.992762 | 1.946811  | 0.013865  |
| C | -0.904881 | -1.699533 | -0.781921 |
| C | 0.232820  | -2.041576 | 0.152308  |
| C | 0.750339  | -0.813142 | 1.003609  |
| H | -1.808131 | 1.360521  | -1.991683 |
| H | 1.371351  | 2.528479  | 0.701452  |
| H | -0.365623 | 2.871147  | -1.070207 |
| C | -2.415818 | 1.265926  | -1.081947 |
| C | -2.237909 | -1.701405 | -0.541608 |
| H | 1.055136  | -2.439234 | -0.459456 |
| C | -3.170123 | -1.109140 | -1.577522 |
| C | -3.599585 | 0.352830  | -1.209728 |
| H | -4.085224 | -1.712723 | -1.674488 |
| H | -4.206440 | 0.340350  | -0.295347 |
| H | -0.604642 | -1.376929 | -1.785436 |
| C | -2.882316 | -2.188175 | 0.731973  |
| H | -3.662849 | -2.927360 | 0.495674  |
| H | -2.174218 | -2.651410 | 1.426049  |
| H | -3.389152 | -1.368347 | 1.265129  |
| H | -2.681975 | -1.092468 | -2.563518 |
| H | -0.034665 | -2.843908 | 0.854740  |
| H | -4.255472 | 0.713586  | -2.018598 |
| H | -0.759226 | 3.672636  | 0.457347  |
| H | 0.219463  | 1.745373  | 1.760235  |
| C | 0.697430  | 0.447955  | 0.081247  |
| H | -0.239076 | 0.356197  | -0.542088 |
| C | -0.163342 | -0.648986 | 2.233126  |
| H | -0.214763 | -1.596626 | 2.784029  |
| H | 0.219917  | 0.104138  | 2.935124  |
| H | -1.182145 | -0.369335 | 1.945104  |
| C | 2.203963  | -1.063135 | 1.477160  |
| H | 2.237287  | -1.987386 | 2.072356  |
| H | 2.498025  | -0.249720 | 2.162487  |
| C | 1.838356  | 0.657113  | -0.755676 |
| H | 1.752324  | 1.450554  | -1.512514 |
| C | 3.212797  | -1.166874 | 0.323638  |
| H | 3.021524  | -2.074742 | -0.266244 |
| H | 4.233083  | -1.275502 | 0.717365  |
| C | 3.174058  | 0.053126  | -0.627086 |
| C | 4.027768  | 1.246123  | -0.024055 |

|   |           |           |           |
|---|-----------|-----------|-----------|
| H | 3.974226  | 2.150896  | -0.641894 |
| H | 3.716076  | 1.486618  | 0.998338  |
| H | 5.070112  | 0.901167  | -0.005562 |
| C | 3.753441  | -0.282618 | -2.030379 |
| H | 3.159603  | -1.062201 | -2.523652 |
| H | 3.788205  | 0.601641  | -2.680360 |
| H | 4.777476  | -0.657584 | -1.904798 |
| C | -2.741206 | 2.010079  | 1.325464  |
| H | -2.079418 | 1.836124  | 2.185229  |
| H | -3.167326 | 3.016990  | 1.459761  |
| H | -3.566024 | 1.293497  | 1.388182  |

**B (G781.707534E\_mBmCqp\_mBPW)**

|   |           |           |           |
|---|-----------|-----------|-----------|
| C | 0.202582  | 0.492572  | 2.053283  |
| C | 1.098136  | -0.726044 | 2.398756  |
| C | 2.237888  | -0.853690 | 1.400590  |
| C | 0.430637  | 0.763108  | -1.585947 |
| C | -0.277525 | 1.985586  | -1.058272 |
| C | -1.273384 | 1.617182  | 0.108385  |
| H | 1.162417  | -2.180616 | 0.181009  |
| H | -0.434058 | 0.753626  | 2.911883  |
| H | 0.509013  | -1.653721 | 2.443987  |
| C | 2.084321  | -1.593160 | 0.279544  |
| C | 1.781829  | 0.542845  | -1.654981 |
| H | -0.837548 | 2.489355  | -1.861110 |
| C | 2.297254  | -0.800586 | -2.110277 |
| C | 2.970383  | -1.597617 | -0.935942 |
| H | 3.044294  | -0.667745 | -2.909320 |
| H | 3.956965  | -1.170044 | -0.718797 |
| H | -0.198014 | -0.000248 | -2.054468 |
| C | 2.808299  | 1.571276  | -1.262235 |
| H | 3.031279  | 2.198895  | -2.140786 |
| H | 2.466969  | 2.242258  | -0.466447 |
| H | 3.752456  | 1.112960  | -0.951881 |
| H | 1.472506  | -1.397416 | -2.527068 |
| H | 0.452728  | 2.717549  | -0.689616 |
| H | 3.144394  | -2.622169 | -1.296766 |
| H | 1.492685  | -0.568710 | 3.413241  |
| H | 0.849180  | 1.361206  | 1.876347  |
| C | -0.713640 | 0.323516  | 0.817829  |
| H | 0.070339  | -0.072678 | -0.061358 |
| C | -1.364326 | 2.807999  | 1.087829  |
| H | -1.791514 | 3.671560  | 0.559408  |
| H | -2.018577 | 2.584492  | 1.940779  |
| H | -0.384928 | 3.114488  | 1.473746  |
| C | -2.708153 | 1.349740  | -0.423852 |
| H | -2.991045 | 2.180765  | -1.085231 |
| H | -3.406894 | 1.386350  | 0.428124  |
| C | -1.465611 | -0.863099 | 0.735992  |
| H | -1.179721 | -1.692211 | 1.393623  |
| C | -2.882164 | 0.015042  | -1.152192 |
| H | -2.247995 | -0.021425 | -2.049998 |
| H | -3.914765 | -0.088004 | -1.514058 |



|   |           |           |           |
|---|-----------|-----------|-----------|
| C | -2.556865 | -1.176354 | -0.220828 |
| C | -3.791030 | -1.539481 | 0.675251  |
| H | -3.566006 | -2.362574 | 1.365650  |
| H | -4.137193 | -0.678236 | 1.258703  |
| H | -4.605027 | -1.861381 | 0.012392  |
| C | -2.155656 | -2.442488 | -1.032653 |
| H | -1.255718 | -2.264366 | -1.636209 |
| H | -1.973126 | -3.304523 | -0.377515 |
| H | -2.978022 | -2.697969 | -1.713923 |
| C | 3.467403  | -0.045577 | 1.746572  |
| H | 3.229757  | 1.020342  | 1.886983  |
| H | 3.877389  | -0.398094 | 2.705670  |
| H | 4.265515  | -0.116330 | 1.001900  |

**B-TS (G781.700262T-398\_mBmCPW)**

|   |           |           |           |
|---|-----------|-----------|-----------|
| C | 0.102847  | -1.035008 | 1.749442  |
| C | 0.963444  | -2.220199 | 1.197170  |
| C | 2.208173  | -1.710851 | 0.484455  |
| C | 0.862372  | 1.681869  | -0.649308 |
| C | 0.127779  | 2.070614  | 0.600037  |
| C | -1.255381 | 1.427907  | 0.787602  |
| H | 1.255082  | -1.652710 | -1.379947 |
| H | -0.520696 | -1.374254 | 2.590074  |
| H | 0.342112  | -2.833315 | 0.525998  |
| C | 2.177411  | -1.415880 | -0.832933 |
| C | 2.197367  | 1.483384  | -0.769682 |
| H | -0.116844 | 3.153212  | 0.600264  |
| C | 2.738810  | 0.773628  | -1.992672 |
| C | 3.218202  | -0.677437 | -1.633920 |
| H | 3.589854  | 1.321427  | -2.426969 |
| H | 4.172204  | -0.621031 | -1.094530 |
| H | 0.252482  | 1.490447  | -1.536725 |
| C | 3.207386  | 1.876226  | 0.276685  |
| H | 3.803344  | 2.719781  | -0.107246 |
| H | 2.764307  | 2.198115  | 1.225679  |
| H | 3.918134  | 1.067292  | 0.483230  |
| H | 1.958042  | 0.711946  | -2.765810 |
| H | 0.742053  | 1.907037  | 1.494676  |
| H | 3.425925  | -1.200522 | -2.579950 |
| H | 1.246178  | -2.860560 | 2.045438  |
| H | 0.774865  | -0.257464 | 2.137439  |
| C | -0.778211 | -0.484384 | 0.644490  |
| H | -0.219686 | -0.247593 | -0.276747 |
| C | -1.808869 | 1.630096  | 2.188317  |
| H | -1.919614 | 2.711998  | 2.364303  |
| H | -2.795564 | 1.170267  | 2.313484  |
| H | -1.132532 | 1.242678  | 2.959716  |
| C | -2.251026 | 1.723560  | -0.348540 |
| H | -1.895839 | 2.613068  | -0.888430 |
| H | -3.220828 | 1.990387  | 0.095159  |
| C | -2.070237 | -0.981930 | 0.491983  |
| H | -2.489047 | -1.597150 | 1.300179  |
| C | -2.476872 | 0.592857  | -1.373335 |

|   |           |           |           |
|---|-----------|-----------|-----------|
| H | -1.553562 | 0.396570  | -1.935612 |
| H | -3.228992 | 0.905781  | -2.110519 |
| C | -2.950679 | -0.700309 | -0.671689 |
| C | -4.431918 | -0.616988 | -0.225905 |
| H | -4.748269 | -1.547637 | 0.263328  |
| H | -4.605952 | 0.209317  | 0.475182  |
| H | -5.073558 | -0.459516 | -1.102101 |
| C | -2.780291 | -1.921237 | -1.643294 |
| H | -1.739952 | -2.025918 | -1.975939 |
| H | -3.097168 | -2.857620 | -1.168216 |
| H | -3.416841 | -1.748213 | -2.521364 |
| C | 3.399856  | -1.512558 | 1.393790  |
| H | 3.171948  | -0.812733 | 2.214064  |
| H | 3.666829  | -2.468732 | 1.870190  |
| H | 4.290608  | -1.144519 | 0.875555  |

**C (G781.698414E\_mBmCqn\_mCPW)**

|   |           |           |           |
|---|-----------|-----------|-----------|
| C | 0.124587  | -1.421370 | 1.559095  |
| C | 1.129313  | -2.438196 | 0.912266  |
| C | 2.344933  | -1.724519 | 0.343020  |
| C | 0.838388  | 1.619429  | -0.505896 |
| C | 0.080141  | 1.878366  | 0.768369  |
| C | -1.357043 | 1.428427  | 0.843304  |
| H | 1.519245  | -1.608063 | -1.578454 |
| H | -0.489945 | -1.911990 | 2.327986  |
| H | 0.605185  | -3.017522 | 0.137698  |
| C | 2.370467  | -1.323341 | -0.946104 |
| C | 2.183242  | 1.587456  | -0.627327 |
| H | -0.047390 | 2.973672  | 0.932317  |
| C | 2.803083  | 1.003380  | -1.879282 |
| C | 3.384873  | -0.427799 | -1.608430 |
| H | 3.618149  | 1.642088  | -2.253977 |
| H | 4.297466  | -0.339955 | -1.004870 |
| H | 0.252319  | 1.371511  | -1.392924 |
| C | 3.137851  | 2.025510  | 0.454011  |
| H | 3.680887  | 2.921312  | 0.113369  |
| H | 2.649848  | 2.281217  | 1.401593  |
| H | 3.899936  | 1.262261  | 0.655888  |
| H | 2.046646  | 0.935685  | -2.675978 |
| H | 0.636313  | 1.531835  | 1.650575  |
| H | 3.693264  | -0.847171 | -2.578417 |
| H | 1.432251  | -3.150211 | 1.694200  |
| H | 0.706916  | -0.633259 | 2.062492  |
| C | -0.753067 | -0.842081 | 0.489310  |
| H | -0.232633 | -0.528680 | -0.418203 |
| C | -1.950060 | 1.464597  | 2.226913  |
| H | -1.966644 | 2.519108  | 2.554739  |
| H | -2.979643 | 1.095961  | 2.255475  |
| H | -1.339063 | 0.915242  | 2.953107  |
| C | -2.255949 | 1.777125  | -0.325944 |
| H | -1.801093 | 2.629804  | -0.852673 |
| H | -3.227347 | 2.106995  | 0.067338  |
| C | -2.118781 | -0.963285 | 0.483260  |

|   |           |           |           |
|---|-----------|-----------|-----------|
| H | -2.591393 | -1.382929 | 1.379782  |
| C | -2.499499 | 0.655156  | -1.362651 |
| H | -1.572099 | 0.439444  | -1.910373 |
| H | -3.226492 | 1.004478  | -2.108665 |
| C | -3.021325 | -0.628599 | -0.675944 |
| C | -4.479249 | -0.458889 | -0.189446 |
| H | -4.841744 | -1.383300 | 0.279554  |
| H | -4.588098 | 0.350879  | 0.544430  |
| H | -5.137582 | -0.232672 | -1.037923 |
| C | -2.956857 | -1.809810 | -1.691772 |
| H | -1.932892 | -1.965579 | -2.055872 |
| H | -3.307065 | -2.743302 | -1.233776 |
| H | -3.605013 | -1.588019 | -2.550085 |
| C | 3.440140  | -1.468478 | 1.354042  |
| H | 3.078633  | -0.860314 | 2.199433  |
| H | 3.782675  | -2.421851 | 1.785218  |
| H | 4.315274  | -0.965144 | 0.932209  |

**C (G781.700102E\_mCmDqp\_mCPW)**

|   |           |           |           |
|---|-----------|-----------|-----------|
| C | 0.069558  | 2.463952  | 0.421822  |
| C | -1.322575 | 2.858233  | -0.111315 |
| C | -2.380273 | 1.801961  | 0.150604  |
| C | -0.745705 | -1.443194 | -0.857224 |
| C | 0.533522  | -1.859101 | -0.187658 |
| C | 1.120856  | -1.038118 | 0.946266  |
| H | -2.473565 | 1.302555  | -1.876196 |
| H | 0.739627  | 3.348375  | 0.372954  |
| H | -1.247274 | 3.066533  | -1.189144 |
| C | -2.863825 | 1.074432  | -0.876001 |
| C | -2.001589 | -1.827212 | -0.532131 |
| H | 1.301171  | -2.049307 | -0.946822 |
| C | -3.172448 | -1.368307 | -1.380278 |
| C | -3.834428 | -0.069225 | -0.833292 |
| H | -3.933442 | -2.161759 | -1.426186 |
| H | -4.224800 | -0.243351 | 0.178635  |
| H | -0.621521 | -0.857301 | -1.772422 |
| C | -2.356476 | -2.679046 | 0.661903  |
| H | -2.905121 | -3.576783 | 0.339891  |
| H | -1.493995 | -3.008033 | 1.253160  |
| H | -3.032577 | -2.131021 | 1.336873  |
| H | -2.837311 | -1.180976 | -2.411414 |
| H | 0.382970  | -2.839408 | 0.308476  |
| H | -4.705663 | 0.156064  | -1.469467 |
| H | -1.603854 | 3.805897  | 0.375928  |
| H | 0.042579  | 2.216807  | 1.496747  |
| C | 0.819705  | 1.408335  | -0.322950 |
| H | 0.532348  | 1.207780  | -1.358669 |
| C | 0.180073  | -0.646927 | 2.044930  |
| H | -0.045546 | -1.555862 | 2.628792  |
| H | 0.622408  | 0.075692  | 2.740417  |
| H | -0.767932 | -0.272485 | 1.645661  |
| C | 2.545184  | -1.425630 | 1.314176  |
| H | 2.538176  | -2.496267 | 1.585072  |

|   |           |           |           |
|---|-----------|-----------|-----------|
| H | 2.859334  | -0.878431 | 2.213794  |
| C | 1.933518  | 0.793271  | 0.224392  |
| H | 2.188820  | 1.154020  | 1.229365  |
| C | 3.499632  | -1.163720 | 0.134944  |
| H | 3.419565  | -1.968291 | -0.608434 |
| H | 4.539041  | -1.177683 | 0.487339  |
| C | 3.145445  | 0.222221  | -0.529919 |
| C | 4.307886  | 1.225605  | -0.303762 |
| H | 4.065473  | 2.218268  | -0.707049 |
| H | 4.544805  | 1.334873  | 0.764040  |
| H | 5.211238  | 0.864430  | -0.813404 |
| C | 2.906387  | 0.074112  | -2.046288 |
| H | 2.038500  | -0.555848 | -2.281702 |
| H | 2.755031  | 1.051899  | -2.523826 |
| H | 3.784445  | -0.388299 | -2.514924 |
| C | -2.845247 | 1.684310  | 1.585157  |
| H | -2.002169 | 1.678602  | 2.293213  |
| H | -3.461708 | 2.556552  | 1.854897  |
| H | -3.444249 | 0.787053  | 1.774150  |

**C-TS (G781.701853T-241\_mCmDPW)**

|   |           |           |           |
|---|-----------|-----------|-----------|
| C | 0.023759  | 2.437397  | 0.456067  |
| C | -1.366388 | 2.848407  | -0.066574 |
| C | -2.414705 | 1.775266  | 0.162286  |
| C | -0.694701 | -1.446356 | -0.846740 |
| C | 0.577081  | -1.863926 | -0.164075 |
| C | 1.178529  | -1.015487 | 0.950368  |
| H | -2.486561 | 1.322540  | -1.876877 |
| H | 0.707117  | 3.313384  | 0.417602  |
| H | -1.290469 | 3.089303  | -1.137423 |
| C | -2.879050 | 1.064467  | -0.884845 |
| C | -1.957172 | -1.821304 | -0.531469 |
| H | 1.340610  | -2.074406 | -0.922340 |
| C | -3.114716 | -1.381295 | -1.406746 |
| C | -3.823416 | -0.101125 | -0.872703 |
| H | -3.855849 | -2.191948 | -1.476028 |
| H | -4.237018 | -0.289045 | 0.127271  |
| H | -0.560728 | -0.882788 | -1.774848 |
| C | -2.329431 | -2.655495 | 0.669453  |
| H | -2.868847 | -3.560275 | 0.351244  |
| H | -1.475926 | -2.971027 | 1.279908  |
| H | -3.019814 | -2.100516 | 1.323736  |
| H | -2.757260 | -1.181209 | -2.427902 |
| H | 0.415118  | -2.831902 | 0.349253  |
| H | -4.681460 | 0.105527  | -1.532338 |
| H | -1.651143 | 3.779272  | 0.449819  |
| H | 0.000542  | 2.177434  | 1.528414  |
| C | 0.759550  | 1.385850  | -0.301691 |
| H | 0.458161  | 1.189261  | -1.334031 |
| C | 0.251106  | -0.674304 | 2.083686  |
| H | 0.071120  | -1.595815 | 2.661898  |
| H | 0.686527  | 0.055981  | 2.776136  |
| H | -0.718591 | -0.322957 | 1.716128  |

|   |           |           |           |
|---|-----------|-----------|-----------|
| C | 2.613218  | -1.406696 | 1.296376  |
| H | 2.620488  | -2.478686 | 1.558285  |
| H | 2.939734  | -0.861749 | 2.193434  |
| C | 1.881578  | 0.760318  | 0.234918  |
| H | 2.153570  | 1.147970  | 1.225781  |
| C | 3.534178  | -1.115775 | 0.097840  |
| H | 3.464210  | -1.922036 | -0.644754 |
| H | 4.582294  | -1.090770 | 0.422816  |
| C | 3.109989  | 0.255500  | -0.552976 |
| C | 4.224991  | 1.312319  | -0.339577 |
| H | 3.927123  | 2.295653  | -0.728922 |
| H | 4.477991  | 1.423985  | 0.724299  |
| H | 5.134945  | 1.000411  | -0.869709 |
| C | 2.849522  | 0.107304  | -2.065331 |
| H | 2.007999  | -0.560960 | -2.289881 |
| H | 2.646488  | 1.079893  | -2.534617 |
| H | 3.739382  | -0.311923 | -2.552061 |
| C | -2.882230 | 1.613685  | 1.591192  |
| H | -2.040147 | 1.586190  | 2.300229  |
| H | -3.498610 | 2.477586  | 1.886708  |
| H | -3.481134 | 0.711132  | 1.752020  |

**D (G781.709977E\_mCmDqn\_mDPW)**

|   |           |           |           |
|---|-----------|-----------|-----------|
| C | -0.218198 | 2.225420  | 0.665755  |
| C | -1.580445 | 2.743992  | 0.177473  |
| C | -2.605474 | 1.626795  | 0.228523  |
| C | -0.422942 | -1.453765 | -0.821833 |
| C | 0.815567  | -1.903139 | -0.100759 |
| C | 1.462961  | -0.930837 | 0.925845  |
| H | -2.540051 | 1.392368  | -1.850157 |
| H | 0.535948  | 3.046618  | 0.701178  |
| H | -1.477718 | 3.130994  | -0.846884 |
| C | -2.957395 | 1.000312  | -0.913996 |
| C | -1.722358 | -1.767645 | -0.531145 |
| H | 1.559839  | -2.169413 | -0.863222 |
| C | -2.814990 | -1.423372 | -1.518088 |
| C | -3.752600 | -0.259767 | -1.060571 |
| H | -3.437171 | -2.318011 | -1.681221 |
| H | -4.274166 | -0.537813 | -0.135827 |
| H | -0.255529 | -1.004005 | -1.805019 |
| C | -2.159256 | -2.502123 | 0.707824  |
| H | -2.698817 | -3.420322 | 0.428994  |
| H | -1.336301 | -2.776864 | 1.373456  |
| H | -2.872689 | -1.895058 | 1.285342  |
| H | -2.373572 | -1.153944 | -2.488687 |
| H | 0.615994  | -2.832450 | 0.454905  |
| H | -4.522663 | -0.140028 | -1.837712 |
| H | -1.875885 | 3.589815  | 0.817270  |
| H | -0.256087 | 1.888768  | 1.717719  |
| C | 0.450227  | 1.198074  | -0.162454 |
| H | 0.135650  | 1.096089  | -1.202370 |
| C | 0.655453  | -0.881463 | 2.225286  |
| H | 0.670574  | -1.866884 | 2.710887  |

|   |           |           |           |
|---|-----------|-----------|-----------|
| H | 1.081448  | -0.160552 | 2.936395  |
| H | -0.393227 | -0.616480 | 2.040610  |
| C | 2.954843  | -1.283841 | 1.134731  |
| H | 3.080529  | -2.360582 | 1.318909  |
| H | 3.330758  | -0.756866 | 2.025090  |
| C | 1.655643  | 0.559865  | 0.319733  |
| H | 1.962387  | 1.115203  | 1.223897  |
| C | 3.677007  | -0.800215 | -0.134816 |
| H | 3.664495  | -1.579958 | -0.909102 |
| H | 4.733412  | -0.573319 | 0.060390  |
| C | 2.912691  | 0.473901  | -0.643638 |
| C | 3.747051  | 1.753920  | -0.419236 |
| H | 3.181985  | 2.658356  | -0.689695 |
| H | 4.070077  | 1.849629  | 0.627245  |
| H | 4.650256  | 1.727209  | -1.044045 |
| C | 2.562865  | 0.360367  | -2.138985 |
| H | 1.919697  | -0.500201 | -2.361743 |
| H | 2.073738  | 1.268456  | -2.520011 |
| H | 3.487707  | 0.228744  | -2.715749 |
| C | -3.112356 | 1.274902  | 1.606003  |
| H | -2.288969 | 1.025618  | 2.295518  |
| H | -3.627331 | 2.141264  | 2.049788  |
| H | -3.814069 | 0.435346  | 1.609941  |

**D (G781.709977E\_mCmDqn\_mDPW)**

|   |           |           |           |
|---|-----------|-----------|-----------|
| C | -0.218198 | 2.225420  | 0.665755  |
| C | -1.580445 | 2.743992  | 0.177473  |
| C | -2.605474 | 1.626795  | 0.228523  |
| C | -0.422942 | -1.453765 | -0.821833 |
| C | 0.815567  | -1.903139 | -0.100759 |
| C | 1.462961  | -0.930837 | 0.925845  |
| H | -2.540051 | 1.392368  | -1.850157 |
| H | 0.535948  | 3.046618  | 0.701178  |
| H | -1.477718 | 3.130994  | -0.846884 |
| C | -2.957395 | 1.000312  | -0.913996 |
| C | -1.722358 | -1.767645 | -0.531145 |
| H | 1.559839  | -2.169413 | -0.863222 |
| C | -2.814990 | -1.423372 | -1.518088 |
| C | -3.752600 | -0.259767 | -1.060571 |
| H | -3.437171 | -2.318011 | -1.681221 |
| H | -4.274166 | -0.537813 | -0.135827 |
| H | -0.255529 | -1.004005 | -1.805019 |
| C | -2.159256 | -2.502123 | 0.707824  |
| H | -2.698817 | -3.420322 | 0.428994  |
| H | -1.336301 | -2.776864 | 1.373456  |
| H | -2.872689 | -1.895058 | 1.285342  |
| H | -2.373572 | -1.153944 | -2.488687 |
| H | 0.615994  | -2.832450 | 0.454905  |
| H | -4.522663 | -0.140028 | -1.837712 |
| H | -1.875885 | 3.589815  | 0.817270  |
| H | -0.256087 | 1.888768  | 1.717719  |
| C | 0.450227  | 1.198074  | -0.162454 |
| H | 0.135650  | 1.096089  | -1.202370 |

|   |           |           |           |
|---|-----------|-----------|-----------|
| C | 0.655453  | -0.881463 | 2.225286  |
| H | 0.670574  | -1.866884 | 2.710887  |
| H | 1.081448  | -0.160552 | 2.936395  |
| H | -0.393227 | -0.616480 | 2.040610  |
| C | 2.954843  | -1.283841 | 1.134731  |
| H | 3.080529  | -2.360582 | 1.318909  |
| H | 3.330758  | -0.756866 | 2.025090  |
| C | 1.655643  | 0.559865  | 0.319733  |
| H | 1.962387  | 1.115203  | 1.223897  |
| C | 3.677007  | -0.800215 | -0.134816 |
| H | 3.664495  | -1.579958 | -0.909102 |
| H | 4.733412  | -0.573319 | 0.060390  |
| C | 2.912691  | 0.473901  | -0.643638 |
| C | 3.747051  | 1.753920  | -0.419236 |
| H | 3.181985  | 2.658356  | -0.689695 |
| H | 4.070077  | 1.849629  | 0.627245  |
| H | 4.650256  | 1.727209  | -1.044045 |
| C | 2.562865  | 0.360367  | -2.138985 |
| H | 1.919697  | -0.500201 | -2.361743 |
| H | 2.073738  | 1.268456  | -2.520011 |
| H | 3.487707  | 0.228744  | -2.715749 |
| C | -3.112356 | 1.274902  | 1.606003  |
| H | -2.288969 | 1.025618  | 2.295518  |
| H | -3.627331 | 2.141264  | 2.049788  |
| H | -3.814069 | 0.435346  | 1.609941  |

**D-TS (G781.707568T5-58\_mDmEtsPW)**

|   |           |           |           |
|---|-----------|-----------|-----------|
| C | -0.583980 | 1.631380  | 1.064329  |
| C | -1.843600 | 2.391892  | 0.582166  |
| C | -2.940023 | 1.395947  | 0.278831  |
| C | -0.145301 | -1.331842 | -0.782482 |
| C | 1.024200  | -1.911845 | -0.032829 |
| C | 1.765843  | -0.935542 | 0.933683  |
| H | -2.390744 | 1.349626  | -1.737812 |
| H | 0.112342  | 2.334056  | 1.561483  |
| H | -1.587902 | 2.990212  | -0.304808 |
| C | -3.018343 | 0.886169  | -0.965709 |
| C | -1.487666 | -1.602949 | -0.573363 |
| H | 1.728980  | -2.271633 | -0.795605 |
| C | -2.473493 | -1.383494 | -1.697724 |
| C | -3.648694 | -0.408326 | -1.378099 |
| H | -2.890395 | -2.375108 | -1.950395 |
| H | -4.298138 | -0.829935 | -0.600200 |
| H | 0.090314  | -0.967152 | -1.785056 |
| C | -2.024754 | -2.186593 | 0.696312  |
| H | -2.728536 | -3.003573 | 0.481606  |
| H | -1.249564 | -2.551026 | 1.376737  |
| H | -2.607378 | -1.418280 | 1.226542  |
| H | -1.943834 | -1.024703 | -2.591808 |
| H | 0.718687  | -2.799154 | 0.539099  |
| H | -4.254663 | -0.311351 | -2.290841 |
| H | -2.137284 | 3.094334  | 1.376627  |
| H | -0.841237 | 0.920855  | 1.868698  |

|   |           |           |           |
|---|-----------|-----------|-----------|
| C | 0.251133  | 0.952561  | 0.018864  |
| H | -0.000170 | 1.174504  | -1.019304 |
| C | 1.219079  | -1.076241 | 2.360176  |
| H | 1.446222  | -2.079061 | 2.747526  |
| H | 1.679825  | -0.346225 | 3.039170  |
| H | 0.129157  | -0.949345 | 2.406637  |
| C | 3.297651  | -1.121658 | 0.864631  |
| H | 3.577593  | -2.180958 | 0.954806  |
| H | 3.766309  | -0.590333 | 1.707877  |
| C | 1.624700  | 0.543538  | 0.369229  |
| H | 1.886317  | 1.150768  | 1.254330  |
| C | 3.715782  | -0.494809 | -0.473738 |
| H | 3.578680  | -1.215963 | -1.293540 |
| H | 4.775351  | -0.207822 | -0.486649 |
| C | 2.785460  | 0.744664  | -0.693021 |
| C | 3.520861  | 2.053214  | -0.321873 |
| H | 2.848062  | 2.921778  | -0.380981 |
| H | 3.932573  | 2.009718  | 0.696806  |
| H | 4.357574  | 2.230528  | -1.011126 |
| C | 2.333425  | 0.836212  | -2.161618 |
| H | 1.807717  | -0.065464 | -2.502579 |
| H | 1.693142  | 1.710237  | -2.350705 |
| H | 3.217548  | 0.947125  | -2.803275 |
| C | -3.775186 | 0.968982  | 1.461756  |
| H | -4.387370 | 1.819452  | 1.800626  |
| H | -4.459396 | 0.141953  | 1.243153  |
| H | -3.152357 | 0.684390  | 2.325838  |

**E (G781.741035E\_mDmEtsqp\_mEPW)**

|   |           |           |           |
|---|-----------|-----------|-----------|
| C | 0.594127  | 0.099108  | 1.847018  |
| C | 1.902919  | -0.692993 | 2.129450  |
| C | 2.941037  | -0.554406 | 1.036940  |
| C | 0.182840  | 0.307126  | -0.747934 |
| C | -0.625222 | 1.631486  | -0.691285 |
| C | -1.965926 | 1.306335  | 0.045102  |
| H | 1.934421  | -1.966341 | -0.166371 |
| H | -0.036575 | -0.038132 | 2.735935  |
| H | 1.635846  | -1.754963 | 2.247596  |
| C | 2.739933  | -1.226162 | -0.149526 |
| C | 1.632722  | 0.471697  | -1.089984 |
| H | -0.781651 | 2.043367  | -1.697906 |
| C | 2.277626  | -0.336989 | -2.227167 |
| C | 3.437148  | -1.047920 | -1.487545 |
| H | 2.598254  | 0.320546  | -3.050658 |
| H | 4.328102  | -0.412742 | -1.422746 |
| H | -0.246122 | -0.343972 | -1.525624 |
| C | 2.324253  | 1.765276  | -0.800158 |
| H | 1.928099  | 2.474774  | -1.549917 |
| H | 2.100098  | 2.188325  | 0.183260  |
| H | 3.405655  | 1.717710  | -0.958138 |
| H | 1.564146  | -1.071356 | -2.623016 |
| H | -0.075298 | 2.390955  | -0.119561 |
| H | 3.727165  | -1.997108 | -1.954455 |



|   |           |           |           |
|---|-----------|-----------|-----------|
| H | 2.325042  | -0.354107 | 3.085145  |
| H | 0.799001  | 1.179241  | 1.793676  |
| C | -0.198806 | -0.389520 | 0.616227  |
| H | -0.025704 | -1.470317 | 0.524516  |
| C | -2.286548 | 2.414166  | 1.063828  |
| H | -2.434496 | 3.380868  | 0.560841  |
| H | -3.207259 | 2.181011  | 1.615486  |
| H | -1.476939 | 2.538371  | 1.798373  |
| C | -3.136046 | 1.094629  | -0.954227 |
| H | -3.076686 | 1.780492  | -1.810972 |
| H | -4.090718 | 1.307237  | -0.450633 |
| C | -1.722616 | -0.101474 | 0.706896  |
| H | -2.001260 | -0.079553 | 1.772176  |
| C | -3.070733 | -0.384253 | -1.347552 |
| H | -2.303278 | -0.547256 | -2.124179 |
| H | -4.015252 | -0.761005 | -1.764341 |
| C | -2.680141 | -1.120826 | -0.036446 |
| C | -3.937292 | -1.313644 | 0.846106  |
| H | -3.678779 | -1.818469 | 1.787977  |
| H | -4.412751 | -0.357295 | 1.102673  |
| H | -4.684754 | -1.929631 | 0.327142  |
| C | -2.078105 | -2.506257 | -0.327111 |
| H | -1.215063 | -2.458807 | -1.008748 |
| H | -1.764793 | -3.021406 | 0.593168  |
| H | -2.830337 | -3.141736 | -0.814192 |
| C | 4.121070  | 0.319260  | 1.329106  |
| H | 4.679057  | -0.136252 | 2.163771  |
| H | 4.812330  | 0.438911  | 0.490079  |
| H | 3.807055  | 1.310798  | 1.689210  |

**E (G781.741033E\_mE12HmFqp\_mEPW)**

|   |           |           |           |
|---|-----------|-----------|-----------|
| C | 0.594097  | 0.095618  | 1.847209  |
| C | 1.902890  | -0.697023 | 2.128228  |
| C | 2.941040  | -0.556381 | 1.036005  |
| C | 0.182963  | 0.308518  | -0.747444 |
| C | -0.625069 | 1.632804  | -0.688352 |
| C | -1.965872 | 1.306253  | 0.047189  |
| H | 1.934384  | -1.965936 | -0.170008 |
| H | -0.036693 | -0.043399 | 2.735783  |
| H | 1.635785  | -1.759198 | 2.244379  |
| C | 2.739980  | -1.225878 | -0.151702 |
| C | 1.632773  | 0.473740  | -1.089202 |
| H | -0.781313 | 2.046636  | -1.694196 |
| C | 2.277689  | -0.332897 | -2.227777 |
| C | 3.437205  | -1.045128 | -1.489390 |
| H | 2.598314  | 0.326124  | -3.050080 |
| H | 4.328136  | -0.410035 | -1.423400 |
| H | -0.245928 | -0.341118 | -1.526385 |
| C | 2.324280  | 1.766801  | -0.797013 |
| H | 2.100089  | 2.188000  | 0.187196  |
| H | 3.405660  | 1.719561  | -0.955100 |
| H | 1.928082  | 2.477707  | -1.545408 |
| H | 1.564232  | -1.066556 | -2.624987 |

|   |           |           |           |
|---|-----------|-----------|-----------|
| H | -0.075185 | 2.391125  | -0.115055 |
| H | 3.727285  | -1.993445 | -1.958026 |
| H | 2.324950  | -0.359923 | 3.084579  |
| H | 0.798940  | 1.175849  | 1.795991  |
| C | -0.198753 | -0.390618 | 0.615429  |
| H | -0.025691 | -1.471241 | 0.521648  |
| C | -2.286778 | 2.412319  | 1.067752  |
| H | -2.434794 | 3.379852  | 0.566387  |
| H | -3.207530 | 2.178097  | 1.618889  |
| H | -1.477278 | 2.535379  | 1.802606  |
| C | -3.135806 | 1.096177  | -0.952738 |
| H | -3.076146 | 1.783296  | -1.808452 |
| H | -4.090555 | 1.308189  | -0.449045 |
| C | -1.722581 | -0.102646 | 0.706647  |
| H | -2.001120 | -0.082437 | 1.771990  |
| C | -3.070650 | -0.382130 | -1.348258 |
| H | -2.303178 | -0.544070 | -2.125090 |
| H | -4.015196 | -0.758126 | -1.765666 |
| C | -2.680231 | -1.120742 | -0.038249 |
| C | -3.937433 | -1.314690 | 0.843971  |
| H | -3.679025 | -1.820991 | 1.785076  |
| H | -4.412757 | -0.358663 | 1.101983  |
| H | -4.684982 | -1.929766 | 0.324050  |
| C | -2.078406 | -2.505822 | -0.330999 |
| H | -1.215595 | -2.457504 | -1.012860 |
| H | -1.764839 | -3.022265 | 0.588470  |
| H | -2.830849 | -3.140567 | -0.818711 |
| C | 4.121053  | 0.316770  | 1.329848  |
| H | 3.807022  | 1.307381  | 1.692456  |
| H | 4.679423  | -0.140737 | 2.163170  |
| H | 4.812023  | 0.438512  | 0.490882  |

**E-TS (G781.727775T-730\_mE12HmFPW)**

|   |           |           |           |
|---|-----------|-----------|-----------|
| C | -0.580120 | 1.897633  | -0.857543 |
| C | -2.016463 | 1.986112  | -1.438518 |
| C | -2.911262 | 1.027563  | -0.695505 |
| C | -0.342488 | -0.201083 | 0.608593  |
| C | 0.489194  | 0.507789  | 1.670286  |
| C | 1.839934  | 0.881902  | 0.960712  |
| H | -2.771934 | -0.343094 | -2.268931 |
| H | 0.094926  | 2.465554  | -1.512261 |
| H | -1.990842 | 1.730812  | -2.507678 |
| C | -3.110809 | -0.191147 | -1.238137 |
| C | -1.262032 | -1.258849 | 0.899863  |
| H | 0.655063  | -0.098464 | 2.567574  |
| C | -2.000048 | -2.074027 | -0.139711 |
| C | -3.403085 | -1.449351 | -0.485866 |
| H | -2.129074 | -3.093506 | 0.250990  |
| H | -3.985775 | -1.295413 | 0.431924  |
| H | 0.119471  | -1.393082 | 0.606366  |
| C | -1.558683 | -1.647436 | 2.326900  |
| H | -1.174371 | -0.952639 | 3.075589  |
| H | -2.654120 | -1.684419 | 2.420490  |

|   |           |           |           |
|---|-----------|-----------|-----------|
| H | -1.202535 | -2.664388 | 2.542401  |
| H | -1.425146 | -2.137007 | -1.072433 |
| H | -0.060188 | 1.404613  | 1.995558  |
| H | -3.937617 | -2.191765 | -1.093360 |
| H | -2.348165 | 3.032979  | -1.355756 |
| H | -0.552200 | 2.411587  | 0.112174  |
| C | 0.036963  | 0.457459  | -0.722537 |
| H | -0.277174 | -0.136898 | -1.589284 |
| C | 2.239047  | 2.335157  | 1.258304  |
| H | 2.420571  | 2.477128  | 2.333485  |
| H | 3.164239  | 2.596151  | 0.727521  |
| H | 1.463908  | 3.050210  | 0.951782  |
| C | 2.958693  | -0.111334 | 1.379578  |
| H | 2.915858  | -0.360221 | 2.449189  |
| H | 3.941823  | 0.349795  | 1.206218  |
| C | 1.582559  | 0.575419  | -0.573465 |
| H | 1.929929  | 1.410400  | -1.198913 |
| C | 2.783231  | -1.320226 | 0.456976  |
| H | 1.957755  | -1.969772 | 0.818030  |
| H | 3.667036  | -1.971549 | 0.414164  |
| C | 2.433750  | -0.708120 | -0.927448 |
| C | 3.731890  | -0.244278 | -1.631117 |
| H | 3.502711  | 0.206342  | -2.606899 |
| H | 4.276816  | 0.504552  | -1.041105 |
| H | 4.407190  | -1.093990 | -1.801284 |
| C | 1.731623  | -1.730233 | -1.837772 |
| H | 0.842290  | -2.181194 | -1.368529 |
| H | 1.423070  | -1.285757 | -2.794402 |
| H | 2.414577  | -2.559601 | -2.066034 |
| C | -3.352842 | 1.440489  | 0.688268  |
| H | -2.503413 | 1.726957  | 1.329593  |
| H | -3.990046 | 2.335389  | 0.620267  |
| H | -3.928941 | 0.669669  | 1.212391  |

**F (G781.749734E\_mE12HmFqn\_mFPW)**

|   |           |           |           |
|---|-----------|-----------|-----------|
| C | -0.537976 | 1.405948  | -1.829826 |
| C | -1.705519 | 2.067480  | -1.061584 |
| C | -2.578257 | 1.048353  | -0.360078 |
| C | -0.599199 | -0.194562 | 0.184576  |
| C | -0.064539 | 0.750448  | 1.236123  |
| C | 1.413941  | 1.097890  | 0.807425  |
| H | -2.349667 | -0.246358 | -2.007584 |
| H | -0.892359 | 1.070306  | -2.813894 |
| H | -2.316929 | 2.657643  | -1.764228 |
| C | -2.767392 | -0.156332 | -1.000615 |
| C | -0.993156 | -1.603228 | 0.592409  |
| H | -0.126741 | 0.335563  | 2.246476  |
| C | -1.978719 | -2.303859 | -0.366475 |
| C | -3.276095 | -1.445254 | -0.481638 |
| H | -2.210782 | -3.311267 | 0.003110  |
| H | -3.791700 | -1.370787 | 0.482967  |
| H | -0.033729 | -2.148697 | 0.486753  |
| C | -1.449882 | -1.741112 | 2.060654  |

|   |           |           |           |
|---|-----------|-----------|-----------|
| H | -0.622672 | -1.599328 | 2.765217  |
| H | -2.239551 | -1.024645 | 2.319284  |
| H | -1.845424 | -2.750170 | 2.227411  |
| H | -1.532270 | -2.418969 | -1.365114 |
| H | -0.643103 | 1.683371  | 1.269850  |
| H | -3.954537 | -1.920290 | -1.204775 |
| H | -1.337791 | 2.794364  | -0.322550 |
| H | 0.227873  | 2.163917  | -2.031689 |
| C | 0.118094  | 0.153610  | -1.109619 |
| H | 0.098241  | -0.688301 | -1.812922 |
| C | 1.647435  | 2.615783  | 0.859534  |
| H | 1.530248  | 2.998133  | 1.883777  |
| H | 2.665322  | 2.858396  | 0.526320  |
| H | 0.947361  | 3.165152  | 0.213524  |
| C | 2.435843  | 0.328016  | 1.688721  |
| H | 2.105661  | 0.247928  | 2.733917  |
| H | 3.385094  | 0.883245  | 1.706221  |
| C | 1.570055  | 0.481622  | -0.638627 |
| H | 1.986623  | 1.225753  | -1.333833 |
| C | 2.633536  | -1.028345 | 1.001489  |
| H | 1.827352  | -1.728668 | 1.279841  |
| H | 3.572354  | -1.518659 | 1.293342  |
| C | 2.599746  | -0.706005 | -0.518204 |
| C | 3.984383  | -0.167321 | -0.958313 |
| H | 3.981235  | 0.085940  | -2.027966 |
| H | 4.274560  | 0.735940  | -0.404864 |
| H | 4.762757  | -0.924708 | -0.793587 |
| C | 2.280121  | -1.944552 | -1.372725 |
| H | 1.339271  | -2.437767 | -1.088458 |
| H | 2.220483  | -1.694102 | -2.441847 |
| H | 3.076199  | -2.692584 | -1.257096 |
| C | -3.320834 | 1.466516  | 0.877477  |
| H | -2.649149 | 1.884087  | 1.640377  |
| H | -4.015018 | 2.276811  | 0.604599  |
| H | -3.908725 | 0.658185  | 1.323197  |

**F (G781.749731E\_fgscsqFPW)**

|   |           |           |           |
|---|-----------|-----------|-----------|
| C | -0.537816 | 1.405863  | -1.829818 |
| C | -1.705627 | 2.067346  | -1.061870 |
| C | -2.578308 | 1.048180  | -0.360266 |
| C | -0.599147 | -0.194390 | 0.184697  |
| C | -0.064386 | 0.750735  | 1.236064  |
| C | 1.414105  | 1.098003  | 0.807280  |
| H | -2.349657 | -0.246540 | -2.007745 |
| H | -0.891882 | 1.070346  | -2.814031 |
| H | -2.317092 | 2.657157  | -1.764761 |
| C | -2.767425 | -0.156506 | -1.000794 |
| C | -0.993292 | -1.602896 | 0.592795  |
| H | -0.126561 | 0.336023  | 2.246499  |
| C | -1.978470 | -2.303795 | -0.366255 |
| C | -3.275986 | -1.445441 | -0.481740 |
| H | -2.210452 | -3.311191 | 0.003398  |
| H | -3.791690 | -1.370931 | 0.482817  |

|   |           |           |           |
|---|-----------|-----------|-----------|
| H | -0.033851 | -2.148456 | 0.487761  |
| C | -1.450645 | -1.740232 | 2.060902  |
| H | -0.623677 | -1.598365 | 2.765727  |
| H | -2.240254 | -1.023505 | 2.318987  |
| H | -1.846442 | -2.749159 | 2.227828  |
| H | -1.531780 | -2.418945 | -1.364782 |
| H | -0.642901 | 1.683695  | 1.269633  |
| H | -3.954278 | -1.920676 | -1.204886 |
| H | -1.338162 | 2.794453  | -0.322941 |
| H | 0.228031  | 2.163921  | -2.031378 |
| C | 0.118118  | 0.153530  | -1.109569 |
| H | 0.098187  | -0.688448 | -1.812793 |
| C | 1.647723  | 2.615880  | 0.859156  |
| H | 1.530533  | 2.998408  | 1.883332  |
| H | 2.665641  | 2.858355  | 0.525942  |
| H | 0.947726  | 3.165219  | 0.213038  |
| C | 2.435974  | 0.328197  | 1.688692  |
| H | 2.105772  | 0.248264  | 2.733893  |
| H | 3.385231  | 0.883413  | 1.706107  |
| C | 1.570137  | 0.481477  | -0.638664 |
| H | 1.986737  | 1.225443  | -1.334025 |
| C | 2.633657  | -1.028272 | 1.001649  |
| H | 1.827549  | -1.728614 | 1.280204  |
| H | 3.572525  | -1.518489 | 1.293505  |
| C | 2.599720  | -0.706243 | -0.518103 |
| C | 3.984354  | -0.167803 | -0.958498 |
| H | 3.981127  | 0.085240  | -2.028204 |
| H | 4.274686  | 0.735541  | -0.405261 |
| H | 4.762683  | -0.925223 | -0.793699 |
| C | 2.279830  | -1.944947 | -1.372304 |
| H | 1.338896  | -2.437894 | -1.087861 |
| H | 2.220227  | -1.694774 | -2.441490 |
| H | 3.075771  | -2.693098 | -1.256492 |
| C | -3.320831 | 1.466347  | 0.877302  |
| H | -2.648997 | 1.883043  | 1.640560  |
| H | -4.014301 | 2.277330  | 0.604658  |
| H | -3.909451 | 0.658259  | 1.322520  |

**F-TS (G781.753429T-330\_fgscsPW)**

|   |           |           |           |
|---|-----------|-----------|-----------|
| C | 0.596319  | -1.522594 | -1.799476 |
| C | 1.645968  | -2.215994 | -0.912748 |
| C | 2.580993  | -1.256602 | -0.237680 |
| C | 0.735144  | 0.361388  | -0.019845 |
| C | 0.332587  | -0.337461 | 1.286430  |
| C | -1.179971 | -0.723179 | 1.129495  |
| H | 2.280451  | 0.155078  | -1.765799 |
| H | 1.080453  | -1.185195 | -2.727453 |
| H | 2.250294  | -2.909292 | -1.527262 |
| C | 2.581302  | 0.050719  | -0.718896 |
| C | 0.890507  | 1.922105  | 0.021209  |
| H | 0.524726  | 0.268380  | 2.176160  |
| C | 2.259625  | 2.374834  | -0.577422 |
| C | 3.286332  | 1.281037  | -0.230522 |

|   |           |           |           |
|---|-----------|-----------|-----------|
| H | 2.543148  | 3.360924  | -0.190152 |
| H | 3.491668  | 1.249280  | 0.849215  |
| H | 0.092998  | 2.302542  | -0.637179 |
| C | 0.720248  | 2.561645  | 1.411064  |
| H | -0.226698 | 2.308950  | 1.896895  |
| H | 1.539112  | 2.287935  | 2.091140  |
| H | 0.744619  | 3.652676  | 1.294437  |
| H | 2.188472  | 2.463568  | -1.671989 |
| H | 0.884534  | -1.270095 | 1.439635  |
| H | 4.241648  | 1.433887  | -0.752997 |
| H | 1.185416  | -2.857513 | -0.144132 |
| H | -0.153501 | -2.260445 | -2.109554 |
| C | -0.114936 | -0.293457 | -1.123905 |
| H | -0.289235 | 0.433436  | -1.927674 |
| C | -1.412618 | -2.109019 | 1.759543  |
| H | -1.203205 | -2.090731 | 2.838944  |
| H | -2.453872 | -2.429976 | 1.627237  |
| H | -0.768681 | -2.876971 | 1.304339  |
| C | -2.155754 | 0.329612  | 1.742427  |
| H | -1.697232 | 0.892320  | 2.567392  |
| H | -3.018088 | -0.192598 | 2.180416  |
| C | -1.456199 | -0.694785 | -0.424304 |
| H | -1.731110 | -1.701454 | -0.777070 |
| C | -2.625068 | 1.213949  | 0.579343  |
| H | -1.911904 | 2.031234  | 0.384369  |
| H | -3.593850 | 1.693230  | 0.777078  |
| C | -2.688544 | 0.259398  | -0.639993 |
| C | -3.974939 | -0.600748 | -0.571320 |
| H | -4.022918 | -1.297357 | -1.420284 |
| H | -4.038417 | -1.195536 | 0.349191  |
| H | -4.865815 | 0.040755  | -0.611852 |
| C | -2.700214 | 1.027172  | -1.973435 |
| H | -1.886835 | 1.763476  | -2.046457 |
| H | -2.630629 | 0.348552  | -2.836266 |
| H | -3.640503 | 1.586595  | -2.071929 |
| C | 3.382729  | -1.706244 | 0.933457  |
| H | 2.847087  | -2.438440 | 1.551467  |
| H | 4.276744  | -2.222785 | 0.539501  |
| H | 3.740047  | -0.875074 | 1.550115  |

**G (G781.768851E\_fgscsqnGPW)**

|   |           |           |           |
|---|-----------|-----------|-----------|
| C | 0.333692  | -1.264059 | -1.972561 |
| C | 1.116936  | -2.307405 | -1.148388 |
| C | 2.098693  | -1.706205 | -0.209784 |
| C | 0.969767  | 0.493956  | -0.206472 |
| C | 0.513425  | 0.456523  | 1.268478  |
| C | -0.963813 | -0.039134 | 1.327474  |
| H | 2.513311  | -0.193279 | -1.540837 |
| H | 0.966313  | -0.866819 | -2.780760 |
| H | 1.699183  | -2.969204 | -1.823121 |
| C | 2.417558  | -0.334121 | -0.451965 |
| C | 1.561931  | 1.877924  | -0.635478 |
| H | 0.619645  | 1.443581  | 1.735871  |

|   |           |           |           |
|---|-----------|-----------|-----------|
| C | 2.921674  | 1.973449  | 0.107582  |
| C | 3.444637  | 0.512887  | 0.290611  |
| H | 2.782727  | 2.449556  | 1.087929  |
| H | 3.494989  | 0.247647  | 1.355182  |
| H | 1.758250  | 1.804266  | -1.720458 |
| C | 0.650547  | 3.087824  | -0.416535 |
| H | -0.275455 | 3.009770  | -0.998947 |
| H | 0.384576  | 3.228569  | 0.638526  |
| H | 1.174069  | 3.995924  | -0.745589 |
| H | 3.628572  | 2.599992  | -0.450741 |
| H | 1.156012  | -0.195507 | 1.879470  |
| H | 4.448369  | 0.362795  | -0.129460 |
| H | 0.468707  | -3.003245 | -0.590389 |
| H | -0.514274 | -1.759041 | -2.462912 |
| C | -0.166788 | -0.114487 | -1.062814 |
| H | -0.536634 | 0.680953  | -1.726926 |
| C | -1.090758 | -1.108054 | 2.430677  |
| H | -0.826094 | -0.688218 | 3.411892  |
| H | -2.110387 | -1.503210 | 2.503866  |
| H | -0.423223 | -1.964420 | 2.241107  |
| C | -1.991064 | 1.127558  | 1.554186  |
| H | -1.504957 | 2.046001  | 1.910387  |
| H | -2.706271 | 0.837518  | 2.336861  |
| C | -1.300894 | -0.588402 | -0.104965 |
| H | -1.323426 | -1.692688 | -0.096166 |
| C | -2.726100 | 1.337166  | 0.216339  |
| H | -2.183894 | 2.056697  | -0.418886 |
| H | -3.739957 | 1.740166  | 0.347806  |
| C | -2.731382 | -0.054934 | -0.462310 |
| C | -3.808002 | -0.962438 | 0.180360  |
| H | -3.749842 | -1.985044 | -0.219724 |
| H | -3.725496 | -1.025914 | 1.271668  |
| H | -4.809903 | -0.572627 | -0.045286 |
| C | -3.032297 | 0.020452  | -1.971235 |
| H | -2.377625 | 0.718896  | -2.509970 |
| H | -2.949357 | -0.967158 | -2.448680 |
| H | -4.061832 | 0.369905  | -2.127757 |
| C | 2.570503  | -2.462511 | 0.965819  |
| H | 2.376720  | -3.538326 | 0.890347  |
| H | 3.623659  | -2.257519 | 1.195673  |
| H | 1.993930  | -2.085971 | 1.835906  |

**G (G781.770143E\_gh12htsqpGPW)**

|   |           |           |           |
|---|-----------|-----------|-----------|
| C | -0.442005 | -0.972240 | 2.153675  |
| C | -1.265947 | -2.047618 | 1.425973  |
| C | -2.211324 | -1.497672 | 0.423189  |
| C | -0.887848 | 0.584809  | 0.158153  |
| C | -0.384201 | 0.283351  | -1.271969 |
| C | 0.906205  | -0.589596 | -1.200636 |
| H | -2.499442 | 0.212601  | 1.522351  |
| H | -1.076819 | -0.444790 | 2.882443  |
| H | -1.877135 | -2.630647 | 2.146244  |
| C | -2.395977 | -0.080341 | 0.463588  |

|   |           |           |           |
|---|-----------|-----------|-----------|
| C | -1.378089 | 2.061629  | 0.343960  |
| H | -0.162802 | 1.233666  | -1.776076 |
| C | -2.691773 | 2.143155  | -0.473642 |
| C | -3.352208 | 0.730325  | -0.406649 |
| H | -2.464892 | 2.402717  | -1.517089 |
| H | -3.459596 | 0.298509  | -1.410805 |
| H | -1.624476 | 2.163390  | 1.416579  |
| C | -0.366154 | 3.159286  | 0.006491  |
| H | 0.543721  | 3.076408  | 0.614054  |
| H | -0.078468 | 3.157985  | -1.052293 |
| H | -0.817109 | 4.138679  | 0.218153  |
| H | -3.350939 | 2.930367  | -0.087011 |
| H | -1.151824 | -0.185341 | -1.906628 |
| H | -4.355077 | 0.749808  | 0.041772  |
| H | -0.643154 | -2.815813 | 0.935731  |
| H | 0.353028  | -1.455931 | 2.735902  |
| C | 0.172049  | 0.040887  | 1.148590  |
| H | 0.538789  | 0.884196  | 1.751041  |
| C | 0.668820  | -2.000496 | -1.769517 |
| H | 0.408552  | -1.953478 | -2.837116 |
| H | 1.572828  | -2.616686 | -1.675460 |
| H | -0.142408 | -2.536800 | -1.257118 |
| C | 2.082976  | 0.103922  | -1.951089 |
| H | 1.733993  | 0.672008  | -2.825020 |
| H | 2.782911  | -0.654080 | -2.331896 |
| C | 1.327557  | -0.597368 | 0.318674  |
| H | 1.456574  | -1.637310 | 0.663020  |
| C | 2.769657  | 0.970642  | -0.890571 |
| H | 2.202400  | 1.902355  | -0.727998 |
| H | 3.790294  | 1.266216  | -1.170288 |
| C | 2.739954  | 0.103189  | 0.394030  |
| C | 3.825523  | -0.998777 | 0.317075  |
| H | 3.814787  | -1.617421 | 1.226137  |
| H | 3.684565  | -1.670173 | -0.540366 |
| H | 4.824857  | -0.551146 | 0.227576  |
| C | 3.000672  | 0.939100  | 1.659160  |
| H | 2.364365  | 1.833377  | 1.717432  |
| H | 2.855509  | 0.350124  | 2.576980  |
| H | 4.040529  | 1.293636  | 1.660867  |
| C | -2.828518 | -2.361155 | -0.602570 |
| H | -2.509590 | -1.999914 | -1.597294 |
| H | -2.567989 | -3.419420 | -0.503923 |
| H | -3.922193 | -2.227289 | -0.595390 |

**G-TS (G781.768362T-731\_gh12htsPW)**

|   |           |           |           |
|---|-----------|-----------|-----------|
| C | 0.431128  | -1.140486 | -1.953539 |
| C | 1.207053  | -2.179997 | -1.121372 |
| C | 2.282046  | -1.535195 | -0.281614 |
| C | 0.849587  | 0.635336  | -0.141998 |
| C | 0.094395  | 0.819087  | 1.215784  |
| C | -0.985115 | -0.282291 | 1.321204  |
| H | 2.646554  | -0.406411 | -1.045679 |
| H | 1.122419  | -0.696013 | -2.691755 |



|   |           |           |           |
|---|-----------|-----------|-----------|
| H | 1.655029  | -2.961497 | -1.749828 |
| C | 2.118279  | -0.174576 | 0.093717  |
| C | 1.512729  | 1.968595  | -0.628417 |
| H | -0.388829 | 1.804671  | 1.177446  |
| C | 2.690475  | 2.156826  | 0.368733  |
| C | 3.140413  | 0.721178  | 0.784090  |
| H | 2.344435  | 2.714912  | 1.248969  |
| H | 3.091145  | 0.561237  | 1.870743  |
| H | 1.937701  | 1.757274  | -1.630784 |
| C | 0.610755  | 3.195729  | -0.764114 |
| H | -0.249461 | 2.999365  | -1.417767 |
| H | 0.233804  | 3.541667  | 0.207216  |
| H | 1.176908  | 4.027135  | -1.204591 |
| H | 3.515803  | 2.728885  | -0.072088 |
| H | 0.754167  | 0.838264  | 2.094481  |
| H | 4.168771  | 0.488005  | 0.479009  |
| H | 0.527300  | -2.696943 | -0.421731 |
| H | -0.351919 | -1.649818 | -2.529992 |
| C | -0.198623 | -0.046568 | -1.071425 |
| H | -0.595139 | 0.727888  | -1.742710 |
| C | -0.475461 | -1.487690 | 2.129564  |
| H | -0.329341 | -1.214043 | 3.184350  |
| H | -1.194814 | -2.317561 | 2.096674  |
| H | 0.490235  | -1.869668 | 1.762261  |
| C | -2.288722 | 0.299956  | 1.930480  |
| H | -2.078554 | 1.018760  | 2.735839  |
| H | -2.889309 | -0.506843 | 2.376144  |
| C | -1.338090 | -0.621136 | -0.173022 |
| H | -1.359476 | -1.715799 | -0.309859 |
| C | -3.024616 | 0.915764  | 0.734110  |
| H | -2.573492 | 1.886264  | 0.464655  |
| H | -4.088733 | 1.105314  | 0.930266  |
| C | -2.808547 | -0.097629 | -0.421480 |
| C | -3.777182 | -1.294575 | -0.260687 |
| H | -3.632076 | -2.023563 | -1.071419 |
| H | -3.630677 | -1.824693 | 0.690328  |
| H | -4.821979 | -0.956656 | -0.296281 |
| C | -3.059989 | 0.543200  | -1.797136 |
| H | -2.506434 | 1.483104  | -1.933951 |
| H | -2.798360 | -0.136725 | -2.621617 |
| H | -4.125910 | 0.787556  | -1.903676 |
| C | 3.471312  | -2.349349 | 0.129623  |
| H | 3.100171  | -3.078283 | 0.869572  |
| H | 3.877722  | -2.928316 | -0.708490 |
| H | 4.261379  | -1.764536 | 0.609266  |

**H (G781.778527E\_gh12htsqnHPW)**

|   |           |           |           |
|---|-----------|-----------|-----------|
| C | 0.456279  | -1.270696 | -1.959088 |
| C | 1.268700  | -2.228117 | -1.073075 |
| C | 2.470475  | -1.507017 | -0.431915 |
| C | 0.921013  | 0.580947  | -0.276647 |
| C | 0.505675  | 0.354747  | 1.280011  |
| C | -0.929230 | -0.264421 | 1.291764  |

|   |           |           |           |
|---|-----------|-----------|-----------|
| H | 3.259090  | -1.404600 | -1.211523 |
| H | 1.112176  | -0.850992 | -2.741402 |
| H | 1.649399  | -3.078161 | -1.655144 |
| C | 2.209718  | -0.078949 | -0.128073 |
| C | 1.287818  | 2.070323  | -0.588898 |
| H | 0.591025  | 1.320025  | 1.792185  |
| C | 2.587568  | 2.288809  | 0.223278  |
| C | 3.281015  | 0.907870  | 0.212073  |
| H | 2.351612  | 2.592132  | 1.253416  |
| H | 3.830425  | 0.640760  | 1.128404  |
| H | 1.546078  | 2.083519  | -1.664441 |
| C | 0.215864  | 3.130879  | -0.351079 |
| H | -0.644351 | 2.993306  | -1.016146 |
| H | -0.145056 | 3.130849  | 0.686008  |
| H | 0.630873  | 4.126753  | -0.554398 |
| H | 3.220087  | 3.074853  | -0.204973 |
| H | 1.195431  | -0.316390 | 1.823800  |
| H | 4.031361  | 0.829372  | -0.597484 |
| H | 0.632468  | -2.660444 | -0.284918 |
| H | -0.343385 | -1.816293 | -2.477652 |
| C | -0.168181 | -0.131904 | -1.122611 |
| H | -0.569589 | 0.622754  | -1.813351 |
| C | -0.937921 | -1.455561 | 2.269989  |
| H | -0.702789 | -1.127255 | 3.292791  |
| H | -1.921324 | -1.938764 | 2.293582  |
| H | -0.201455 | -2.220960 | 1.982141  |
| C | -2.003146 | 0.808037  | 1.696725  |
| H | -1.559906 | 1.692577  | 2.175668  |
| H | -2.673966 | 0.365478  | 2.446805  |
| C | -1.287657 | -0.667860 | -0.179694 |
| H | -1.307685 | -1.766368 | -0.267807 |
| C | -2.781238 | 1.155522  | 0.415739  |
| H | -2.293929 | 1.980775  | -0.124636 |
| H | -3.808233 | 1.484275  | 0.627559  |
| C | -2.739831 | -0.132116 | -0.443139 |
| C | -3.768913 | -1.160480 | 0.086508  |
| H | -3.700360 | -2.106339 | -0.469512 |
| H | -3.640981 | -1.390614 | 1.151597  |
| H | -4.788415 | -0.771598 | -0.039662 |
| C | -3.067985 | 0.135582  | -1.923522 |
| H | -2.474180 | 0.953729  | -2.353173 |
| H | -2.914028 | -0.762549 | -2.539088 |
| H | -4.122954 | 0.424199  | -2.024949 |
| C | 3.130300  | -2.298927 | 0.728087  |
| H | 2.422594  | -2.414828 | 1.559142  |
| H | 3.399534  | -3.298424 | 0.368071  |
| H | 4.038483  | -1.810774 | 1.100494  |

**H (G781.778527E\_hi13hqnHPW)**

|   |          |           |           |
|---|----------|-----------|-----------|
| C | 0.456387 | -1.270584 | -1.959187 |
| C | 1.268866 | -2.227962 | -1.073183 |
| C | 2.470591 | -1.506795 | -0.432013 |
| C | 0.920957 | 0.581030  | -0.276716 |

|   |           |           |           |
|---|-----------|-----------|-----------|
| C | 0.505687  | 0.354514  | 1.280019  |
| C | -0.929128 | -0.264814 | 1.291699  |
| H | 3.259092  | -1.404175 | -1.211724 |
| H | 1.112267  | -0.850811 | -2.741476 |
| H | 1.649623  | -3.077969 | -1.655274 |
| C | 2.209693  | -0.078755 | -0.128086 |
| C | 1.287584  | 2.070489  | -0.588706 |
| H | 0.591000  | 1.319743  | 1.792293  |
| C | 2.587267  | 2.289007  | 0.223563  |
| C | 3.280906  | 0.908172  | 0.212101  |
| H | 2.351213  | 2.592088  | 1.253753  |
| H | 3.830604  | 0.641046  | 1.128239  |
| H | 1.545893  | 2.083854  | -1.664236 |
| C | 0.215476  | 3.130864  | -0.350800 |
| H | -0.644719 | 2.993202  | -1.015876 |
| H | -0.145436 | 3.130687  | 0.686290  |
| H | 0.630323  | 4.126820  | -0.554036 |
| H | 3.219701  | 3.075225  | -0.204488 |
| H | 1.195518  | -0.316602 | 1.823751  |
| H | 4.031007  | 0.829925  | -0.597720 |
| H | 0.632665  | -2.660362 | -0.285044 |
| H | -0.343227 | -1.816230 | -2.477777 |
| C | -0.168181 | -0.131840 | -1.122703 |
| H | -0.569619 | 0.622795  | -1.813449 |
| C | -0.937647 | -1.456237 | 2.269583  |
| H | -0.702554 | -1.128207 | 3.292483  |
| H | -1.920994 | -1.939554 | 2.293028  |
| H | -0.201094 | -2.221462 | 1.981510  |
| C | -2.003137 | 0.807414  | 1.697080  |
| H | -1.559953 | 1.691832  | 2.176300  |
| H | -2.673870 | 0.364533  | 2.447044  |
| C | -1.287656 | -0.667894 | -0.179848 |
| H | -1.307750 | -1.766381 | -0.268188 |
| C | -2.781302 | 1.155279  | 0.416238  |
| H | -2.294085 | 1.980773  | -0.123844 |
| H | -3.808322 | 1.483857  | 0.628207  |
| C | -2.739833 | -0.132050 | -0.443112 |
| C | -3.768906 | -1.160619 | 0.086153  |
| H | -3.700336 | -2.106287 | -0.470189 |
| H | -3.640984 | -1.391109 | 1.151166  |
| H | -4.788414 | -0.771713 | -0.039894 |
| C | -3.067974 | 0.136200  | -1.923392 |
| H | -2.474149 | 0.954494  | -2.352737 |
| H | -2.914038 | -0.761700 | -2.539301 |
| H | -4.122935 | 0.424882  | -2.024709 |
| C | 3.130641  | -2.298717 | 0.727819  |
| H | 2.423032  | -2.414839 | 1.558930  |
| H | 3.400043  | -3.298127 | 0.367692  |
| H | 4.038758  | -1.810436 | 1.100224  |

**H-TS (G781.767828T-498\_hi13hPW)**

|   |           |           |          |
|---|-----------|-----------|----------|
| C | -0.449609 | -0.968780 | 2.144388 |
| C | -1.218376 | -2.047978 | 1.369038 |

|   |           |           |           |
|---|-----------|-----------|-----------|
| C | -2.359718 | -1.448931 | 0.533919  |
| C | -0.812053 | 0.715761  | 0.265776  |
| C | -0.466226 | 0.321231  | -1.134078 |
| C | 0.819505  | -0.485424 | -1.212631 |
| H | -3.108575 | -1.069865 | 1.255515  |
| H | -1.141425 | -0.438527 | 2.819722  |
| H | -1.659219 | -2.777620 | 2.062435  |
| C | -1.997041 | -0.141237 | -0.191323 |
| C | -1.353036 | 2.131032  | 0.531627  |
| H | -0.766192 | 0.950000  | -1.979158 |
| C | -2.544635 | 2.257760  | -0.446096 |
| C | -3.130563 | 0.833959  | -0.582452 |
| H | -2.190372 | 2.629772  | -1.419746 |
| H | -3.557673 | 0.623711  | -1.571262 |
| H | -1.738627 | 2.123927  | 1.567045  |
| C | -0.319770 | 3.252439  | 0.397493  |
| H | 0.497896  | 3.142222  | 1.121393  |
| H | 0.114993  | 3.272417  | -0.612835 |
| H | -0.788163 | 4.228805  | 0.576084  |
| H | -3.295446 | 2.975534  | -0.094455 |
| H | -1.518503 | -0.549449 | -1.292186 |
| H | -3.934908 | 0.665874  | 0.148379  |
| H | -0.538838 | -2.625282 | 0.722841  |
| H | 0.318613  | -1.432309 | 2.778983  |
| C | 0.225051  | 0.040337  | 1.192918  |
| H | 0.687306  | 0.829162  | 1.800834  |
| C | 0.669835  | -1.784745 | -2.020984 |
| H | 0.334153  | -1.576814 | -3.046982 |
| H | 1.629615  | -2.309282 | -2.081699 |
| H | -0.052069 | -2.470229 | -1.555360 |
| C | 1.874766  | 0.490323  | -1.873270 |
| H | 1.410938  | 1.267230  | -2.498237 |
| H | 2.505086  | -0.105063 | -2.547347 |
| C | 1.292635  | -0.655549 | 0.281608  |
| H | 1.339846  | -1.722906 | 0.544934  |
| C | 2.694601  | 1.066717  | -0.710260 |
| H | 2.193582  | 1.950929  | -0.284990 |
| H | 3.694185  | 1.391234  | -1.030360 |
| C | 2.747470  | -0.068531 | 0.340190  |
| C | 3.748779  | -1.164794 | -0.099838 |
| H | 3.768004  | -1.987950 | 0.628135  |
| H | 3.514643  | -1.598815 | -1.080678 |
| H | 4.763693  | -0.749444 | -0.161811 |
| C | 3.181600  | 0.435532  | 1.728216  |
| H | 2.622096  | 1.322238  | 2.054585  |
| H | 3.067598  | -0.346208 | 2.492723  |
| H | 4.242062  | 0.720769  | 1.705870  |
| C | -3.055947 | -2.466911 | -0.380015 |
| H | -2.359914 | -2.868812 | -1.130983 |
| H | -3.426545 | -3.313389 | 0.211080  |
| H | -3.911454 | -2.025121 | -0.907825 |

**I (G781.775876E\_hi13hqpIPW)**

|   |           |           |           |
|---|-----------|-----------|-----------|
| C | 0.372741  | -1.484557 | -1.702320 |
| C | 1.271756  | -2.314809 | -0.784549 |
| C | 2.441343  | -1.484584 | -0.244680 |
| C | 0.803555  | 0.588651  | -0.208605 |
| C | 0.190577  | 0.931142  | 1.039187  |
| C | -1.074414 | 0.249440  | 1.312931  |
| H | 2.992050  | -1.069178 | -1.107248 |
| H | 0.961442  | -1.135888 | -2.565990 |
| H | 1.677576  | -3.176387 | -1.333219 |
| C | 2.010536  | -0.260891 | 0.619361  |
| C | 1.636156  | 1.642157  | -0.974806 |
| H | 0.634847  | 1.632181  | 1.755051  |
| C | 2.749601  | 2.062529  | 0.001737  |
| C | 3.125716  | 0.801720  | 0.817424  |
| H | 2.375996  | 2.858433  | 0.664905  |
| H | 3.270248  | 1.033405  | 1.880260  |
| H | 2.085253  | 1.117972  | -1.835611 |
| C | 0.795850  | 2.814901  | -1.495942 |
| H | 0.030763  | 2.493703  | -2.214729 |
| H | 0.293140  | 3.336791  | -0.667507 |
| H | 1.439259  | 3.543049  | -2.006300 |
| H | 3.610300  | 2.486853  | -0.529699 |
| H | 1.663948  | -0.667052 | 1.586407  |
| H | 4.072033  | 0.375329  | 0.459480  |
| H | 0.697796  | -2.732879 | 0.059891  |
| H | -0.443436 | -2.097888 | -2.108374 |
| C | -0.230222 | -0.278647 | -0.969325 |
| H | -0.670266 | 0.388500  | -1.726104 |
| C | -1.139792 | -0.397171 | 2.710573  |
| H | -0.900900 | 0.330618  | 3.497978  |
| H | -2.142336 | -0.791873 | 2.904544  |
| H | -0.428980 | -1.231477 | 2.782489  |
| C | -2.145384 | 1.455838  | 1.163825  |
| H | -1.690169 | 2.457289  | 1.191437  |
| H | -2.798001 | 1.391163  | 2.044424  |
| C | -1.337412 | -0.663177 | 0.067718  |
| H | -1.243632 | -1.726229 | 0.342750  |
| C | -2.878503 | 1.183761  | -0.160798 |
| H | -2.385130 | 1.724476  | -0.983002 |
| H | -3.915671 | 1.545144  | -0.118242 |
| C | -2.796721 | -0.346397 | -0.397678 |
| C | -3.819021 | -1.084359 | 0.498774  |
| H | -3.679402 | -2.172561 | 0.437875  |
| H | -3.759126 | -0.799582 | 1.556702  |
| H | -4.840964 | -0.860282 | 0.164736  |
| C | -3.086877 | -0.730383 | -1.860144 |
| H | -2.432773 | -0.219512 | -2.579066 |
| H | -2.981890 | -1.813527 | -2.012572 |
| H | -4.120155 | -0.462623 | -2.118969 |
| C | 3.396824  | -2.351955 | 0.595553  |
| H | 2.864699  | -2.812121 | 1.440732  |
| H | 3.799922  | -3.160810 | -0.028399 |

|                                     |           |           |           |
|-------------------------------------|-----------|-----------|-----------|
| H                                   | 4.245716  | -1.784274 | 0.995950  |
| <b>I (G781.762206E_ijsctsqnlPW)</b> |           |           |           |
| C                                   | 0.615136  | 0.926587  | 1.985038  |
| C                                   | 1.253269  | 2.124291  | 1.268697  |
| C                                   | 2.312566  | 1.738968  | 0.192929  |
| C                                   | 0.888457  | -0.449057 | -0.195097 |
| C                                   | 0.195564  | -0.034931 | -1.389219 |
| C                                   | -1.149949 | 0.454399  | -1.186959 |
| H                                   | 3.315673  | 1.957476  | 0.598779  |
| H                                   | 1.361545  | 0.393809  | 2.592459  |
| H                                   | 1.700869  | 2.804945  | 2.005048  |
| C                                   | 2.340542  | 0.236595  | -0.150267 |
| C                                   | 1.307226  | -1.990082 | -0.166229 |
| H                                   | 0.627056  | -0.135285 | -2.391930 |
| C                                   | 2.349045  | -1.993865 | 0.975116  |
| C                                   | 3.153214  | -0.688521 | 0.810978  |
| H                                   | 2.976779  | -2.893753 | 0.922770  |
| H                                   | 4.143518  | -0.868048 | 0.370978  |
| H                                   | 0.408898  | -2.566549 | 0.103299  |
| C                                   | 1.866965  | -2.542534 | -1.484388 |
| H                                   | 1.124442  | -2.537275 | -2.293581 |
| H                                   | 2.754521  | -1.996529 | -1.830273 |
| H                                   | 2.170338  | -3.586103 | -1.331133 |
| H                                   | 1.840858  | -2.013341 | 1.949356  |
| H                                   | 2.771403  | 0.135685  | -1.158289 |
| H                                   | 3.321634  | -0.191624 | 1.774089  |
| H                                   | 0.456729  | 2.708919  | 0.778353  |
| H                                   | -0.149555 | 1.281844  | 2.691234  |
| C                                   | -0.051103 | -0.046340 | 0.994667  |
| H                                   | -0.302890 | -0.965183 | 1.540181  |
| C                                   | -1.576288 | 1.631723  | -2.079258 |
| H                                   | -1.302780 | 1.455175  | -3.128068 |
| H                                   | -2.657706 | 1.788893  | -2.028764 |
| H                                   | -1.083995 | 2.553275  | -1.743277 |
| C                                   | -1.956254 | -0.928674 | -1.601302 |
| H                                   | -1.337907 | -1.680669 | -2.113819 |
| H                                   | -2.706481 | -0.598137 | -2.330659 |
| C                                   | -1.355662 | 0.553460  | 0.357314  |
| H                                   | -1.470057 | 1.606320  | 0.660353  |
| C                                   | -2.538704 | -1.453698 | -0.279596 |
| H                                   | -1.870293 | -2.212268 | 0.154422  |
| H                                   | -3.504639 | -1.947147 | -0.462581 |
| C                                   | -2.665653 | -0.239273 | 0.673645  |
| C                                   | -3.910491 | 0.604391  | 0.306892  |
| H                                   | -3.927247 | 1.544599  | 0.874894  |
| H                                   | -3.972488 | 0.857537  | -0.758608 |
| H                                   | -4.824291 | 0.048498  | 0.555479  |
| C                                   | -2.802074 | -0.657871 | 2.149603  |
| H                                   | -2.012011 | -1.344660 | 2.479755  |
| H                                   | -2.787474 | 0.220884  | 2.809280  |
| H                                   | -3.759913 | -1.171312 | 2.307591  |
| C                                   | 2.135940  | 2.580570  | -1.077022 |

|   |          |          |           |
|---|----------|----------|-----------|
| H | 1.199264 | 2.305364 | -1.598254 |
| H | 2.063694 | 3.651633 | -0.845801 |
| H | 2.962014 | 2.436194 | -1.786537 |

**I-TS (G781.754193T-303\_ajsctsPW)**

|   |           |           |           |
|---|-----------|-----------|-----------|
| C | 0.741539  | -1.670528 | -1.523890 |
| C | 1.667718  | -2.306302 | -0.482543 |
| C | 2.834716  | -1.368101 | -0.102305 |
| C | 0.879656  | 0.293829  | 0.093433  |
| C | 0.178709  | 0.401216  | 1.296260  |
| C | -1.175044 | -0.199455 | 1.286696  |
| H | 3.564980  | -1.405241 | -0.929162 |
| H | 1.336934  | -1.361903 | -2.397772 |
| H | 2.078998  | -3.254941 | -0.854044 |
| C | 2.401926  | 0.133149  | 0.022171  |
| C | 0.787487  | 2.227100  | -0.278526 |
| H | 0.615002  | 0.840343  | 2.200098  |
| C | 2.227233  | 2.408990  | -0.750187 |
| C | 2.849026  | 1.061268  | -1.122471 |
| H | 2.811543  | 2.883955  | 0.051912  |
| H | 3.942385  | 1.116650  | -1.202001 |
| H | 0.058565  | 2.098572  | -1.083851 |
| C | 0.331353  | 3.232047  | 0.756524  |
| H | -0.715690 | 3.116172  | 1.051013  |
| H | 0.969701  | 3.235478  | 1.648787  |
| H | 0.433444  | 4.226716  | 0.292054  |
| H | 2.200686  | 3.113090  | -1.599254 |
| H | 2.826373  | 0.540689  | 0.956479  |
| H | 2.466708  | 0.698015  | -2.088244 |
| H | 1.090909  | -2.563775 | 0.425344  |
| H | -0.000083 | -2.391766 | -1.894165 |
| C | -0.003744 | -0.449168 | -0.932746 |
| H | -0.240697 | 0.227211  | -1.766339 |
| C | -1.183756 | -1.236678 | 2.452660  |
| H | -1.146526 | -0.736030 | 3.428995  |
| H | -2.116416 | -1.811176 | 2.389898  |
| H | -0.344929 | -1.941588 | 2.385939  |
| C | -2.354669 | 0.827616  | 1.443910  |
| H | -2.058625 | 1.735329  | 1.985971  |
| H | -3.146407 | 0.355415  | 2.040705  |
| C | -1.311870 | -0.822411 | -0.153351 |
| H | -1.358752 | -1.921277 | -0.082733 |
| C | -2.830658 | 1.080309  | 0.005641  |
| H | -2.201449 | 1.843497  | -0.484487 |
| H | -3.863114 | 1.454136  | -0.029862 |
| C | -2.671489 | -0.282498 | -0.720680 |
| C | -3.804309 | -1.248509 | -0.294710 |
| H | -3.688673 | -2.220767 | -0.793274 |
| H | -3.824979 | -1.435084 | 0.787310  |
| H | -4.784447 | -0.840558 | -0.576825 |
| C | -2.721320 | -0.133166 | -2.251125 |
| H | -2.038676 | 0.642870  | -2.624510 |
| H | -2.475017 | -1.078349 | -2.755000 |

|   |           |           |           |
|---|-----------|-----------|-----------|
| H | -3.733063 | 0.155375  | -2.567158 |
| C | 3.529378  | -1.848095 | 1.179720  |
| H | 2.846643  | -1.780855 | 2.041905  |
| H | 3.842715  | -2.896664 | 1.088710  |
| H | 4.420666  | -1.247231 | 1.406676  |

**J (G781.791289E\_ijsctsqpJPW)**

|   |           |           |           |
|---|-----------|-----------|-----------|
| C | 0.652031  | -2.506028 | 0.428775  |
| C | 2.151705  | -2.402217 | 0.760331  |
| C | 2.892056  | -1.396021 | -0.148410 |
| C | 0.864119  | 0.040087  | 0.283844  |
| C | 0.087462  | 1.262115  | 0.522319  |
| C | -1.427868 | 0.828213  | 0.630286  |
| H | 2.674440  | -1.650652 | -1.203124 |
| H | 0.491773  | -3.194707 | -0.409783 |
| H | 2.615347  | -3.394247 | 0.679867  |
| C | 2.327314  | 0.017298  | 0.123356  |
| C | 0.530349  | 2.429820  | -0.445502 |
| H | 0.432072  | 1.610078  | 1.522379  |
| C | 2.065984  | 2.471674  | -0.555767 |
| C | 2.682550  | 1.123928  | -0.936861 |
| H | 2.495503  | 2.820246  | 0.398335  |
| H | 3.775821  | 1.187807  | -0.998405 |
| H | 0.125439  | 2.183830  | -1.442052 |
| C | -0.039456 | 3.775759  | 0.018580  |
| H | -1.132301 | 3.762389  | 0.097642  |
| H | 0.367425  | 4.051072  | 1.002222  |
| H | 0.233661  | 4.565308  | -0.693822 |
| H | 2.338792  | 3.223437  | -1.311651 |
| H | 2.739623  | 0.395534  | 1.082911  |
| H | 2.319896  | 0.792587  | -1.922823 |
| H | 2.282698  | -2.080308 | 1.808529  |
| H | 0.094010  | -2.918871 | 1.281184  |
| C | 0.026933  | -1.126989 | 0.086255  |
| H | 0.031810  | -1.052142 | -1.043165 |
| C | -1.986828 | 1.336211  | 1.973930  |
| H | -1.999504 | 2.434762  | 2.005334  |
| H | -3.014586 | 0.988964  | 2.134332  |
| H | -1.380531 | 0.980616  | 2.820346  |
| C | -2.339941 | 1.261826  | -0.568062 |
| H | -1.942876 | 2.107958  | -1.139053 |
| H | -3.308877 | 1.595402  | -0.172149 |
| C | -1.406539 | -0.755776 | 0.549523  |
| H | -1.563739 | -1.211125 | 1.542035  |
| C | -2.531498 | 0.010518  | -1.439787 |
| H | -1.688172 | -0.097205 | -2.146658 |
| H | -3.442955 | 0.048221  | -2.051579 |
| C | -2.536066 | -1.177016 | -0.444432 |
| C | -3.887531 | -1.261935 | 0.302231  |
| H | -3.862008 | -2.055392 | 1.062086  |
| H | -4.159909 | -0.327314 | 0.807101  |
| H | -4.694482 | -1.499347 | -0.403871 |
| C | -2.289820 | -2.523677 | -1.146724 |



|   |           |           |           |
|---|-----------|-----------|-----------|
| H | -1.378170 | -2.518060 | -1.763488 |
| H | -2.214298 | -3.351351 | -0.427787 |
| H | -3.124299 | -2.749939 | -1.823829 |
| C | 4.411515  | -1.447803 | 0.063535  |
| H | 4.670036  | -1.211268 | 1.106378  |
| H | 4.794656  | -2.452564 | -0.154273 |
| H | 4.944874  | -0.743650 | -0.587676 |

## References

- 1 R. D. Gietz and R. H. Schiestl, *Nat. Protoc.* 2007, **2**, 31-34.
- 2 J. S. Dickschat, K. A. K. Pahirulzaman, P. Rabe and T. A. Klapschinski, *ChemBioChem* 2014, **15**, 810-814.
- 3 M. M. Bradford, *Anal. Biochem.* 1976, **72**, 248-254.
- 4 G. R. Fulmer, A. J. M. Miller, N. H. Sherden, H. E. Gottlieb, A. Nudelman, B. M. Stoltz, J. E. Bercaw and K. I. Goldberg, *Organometallics* 2010, **29**, 2176-2179.
- 5 S. Grimme, S. Ehrlich and L. Goerigk, *J. Comp. Chem.* 2011, **32**, 1456-1465.
- 6 M. J. Frisch, G. W. Trucks, H. B. Schlegel, G. E. Scuseria, M. A. Robb, J. R. Cheeseman, G. Scalmani, V. Barone, G. A. Petersson, H. Nakatsuji, X. Li, M. Caricato, A. V. Marenich, J. Bloino, B. G. Janesko, R. Gomperts, B. Mennucci, H. P. Hratchian, J. V. Ortiz, A. F. Izmaylov, J. L. Sonnenberg, D. Williams-Young, F. Ding, F. Lipparini, F. Egidi, J. Goings, B. Peng, A. Petrone, T. Henderson, D. Ranasinghe, V. G. Zakrzewski, J. Gao, N. Rega, G. Zheng, W. Liang, M. Hada, M. Ehara, K. Toyota, R. Fukuda, J. Hasegawa, M. Ishida, T. Nakajima, Y. Honda, O. Kitao, H. Nakai, T. Vreven, K. Throssell, J. A. Montgomery, Jr., J. E. Peralta, F. Ogliaro, M. J. Bearpark, J. J. Heyd, E. N. Brothers, K. N. Kudin, V. N. Staroverov, T. A. Keith, R. Kobayashi, J. Normand, K. Raghavachari, A. P. Rendell, J. C. Burant, S. S. Iyengar, J. Tomasi, M. Cossi, J. M. Millam, M. Klene, C. Adamo, R. Cammi, J. W. Ochterski, R. L. Martin, K. Morokuma, O. Farkas, J. B. Foresman, and D. J. Fox, Gaussian 16, Revision C.01, Gaussian, Inc., Wallingford CT, 2019.
- 7 S. Grimme, *Chem. Eur. J.* 2012, **18**, 9955-9964.
- 8 G. Luchini, J. V. Alegre-Requena, Y. Guan, I. Funes-Ardoiz, R. S. Paton, GoodVibes v3.0.1, 2019.
- 9 C. Adamo, V. Barone, *J. Chem. Phys.* 1998, **108**, 664-675.
- 10 S. P. T. Matsuda, W. K. Wilson, Q. Xiong, *Org. Biomol. Chem.* 2006, **4**, 530-543.
- 11 Y. J. Hong, D. J. Tantillo, *J. Org. Chem.* 2018, **83**, 3780-3793.
- 12 L. Lauterbach, B. Goldfuss, J. S. Dickschat, *Angew. Chem. Int. Ed.* 2020, **59**, 11943-11947.
- 13 H. Xu, B. Goldfuss, J. S. Dickschat, *Chem. Eur. J.* 2021, **27**, 9758-9762.
- 14 P. Pracht, F. Bohle, S. Grimme, *Phys. Chem. Chem. Phys.* 2020, **22**, 7169-7192.
- 15 S. Grimme, *J. Chem. Theory Comput.* 2019, **15**, 2847-2862.
- 16 P. Pracht, S. Grimme, *Chem. Sci.* 2021, **12**, 6551-6568.
- 17 P. Pracht, C.A. Bauer, S. Grimme, *J. Comput. Chem.* 2017, **38**, 2618-2631.
- 18 S. Spicher, C. Plett, P. Pracht, A. Hansen, S. Grimme, *J. Chem. Theory Comput.* 2022, **18**, 3174-3189.
- 19 F. Neese, "The ORCA program system" Wiley Interdisciplinary Reviews: Computational Molecular Science, 2012, **2**, 73-78.
- 20 Z. Quan and J. S. Dickschat, *Org. Biomol. Chem.* 2020, **18**, 6072-6076.
- 21 P. Rabe, J. Rinkel, E. Dolja, T. Schmitz, B. Nubbemeyer, T. H. Luu and J. S. Dickschat, *Angew. Chem. Int. Ed.* 2017, **56**, 2776-2779.
- 22 P. Rabe, L. Barra, J. Rinkel, R. Riclea, C. A. Citron, T. A. Klapschinski, A. Janusko and J. S. Dickschat, *Angew. Chem. Int. Ed.* 2015, **54**, 13448-13451.
- 23 H. Li and J. S. Dickschat, *Org. Chem. Front.* 2022, **9**, 795-801.
- 24 G. Bian, J. Rinkel, Z. Wang, L. Lauterbach, A. Hou, Y. Yuan, Z. Deng, T. Liu and J. S. Dickschat, *Angew. Chem. Int. Ed.* 2018, **57**, 15887-15890.
- 25 T. A. Klapschinski, P. Rabe and J. S. Dickschat, *Angew. Chem. Int. Ed.* 2016, **55**, 10141-10144.
- 26 J. Rinkel, P. Rabe, X. Chen, T. G. Köllner, F. Chen and J. S. Dickschat, *Chem. Eur. J.* 2017, **23**, 10501-10505.
- 27 J. Rinkel and J. S. Dickschat, *Org. Lett.* 2019, **21**, 2426-2429.
- 28 F. M. Hahn, A. P. Hurlburt and C. D. Poulter, *J. Bacteriol.* 1999, **181**, 4499-4504.

- 29 L. Lauterbach, J. Rinkel and J. S. Dickschat, *Angew. Chem. Int. Ed.* 2018, **57**, 8280-8283.
- 30 P. Rabe, J. Rinkel, B. Nubbemeyer, T. G. Köllner, F. Chen and J. S. Dickschat, *Angew. Chem. Int. Ed.*, 2016, **55**, 15420-15423.
- 31 C. A. Citron, J. Gleitzmann, G. Laurenzano, R. Pukall and J. S. Dickschat, *ChemBioChem*, 2012, **13**, 202-214.
- 32 H. Utsunomia, J. Kawata, W. Chanoki, N. Shirakawa and M. Miyazawa, *J. Oleo Sci.*, 2005, **54**, 609-612.
